# Supplementary material
Source: PubMed Central journal article supplement (PMC5605940)
Supplement: mbo004173493st1.pdf [file mbo004173493st1.pdf]

| SRA accession | isolate name | State | <i>emm</i> subtype | MLST | <i>tee</i> Type | <i>gacI</i> | <i>emm</i> like gene | surface protein genes (Fn-binding and R28) | <i>has A</i> | <i>sdA</i> | <i>sic</i> | null <i>rocA</i> | Pnga3 | NADase 330G | Exotoxin genes | PBP2X type | resistance       | Total contigs | N50    | Length of longest contig | Total bases in contigs |
|---------------|--------------|-------|--------------------|------|-----------------|-------------|----------------------|--------------------------------------------|--------------|------------|------------|------------------|-------|-------------|----------------|------------|------------------|---------------|--------|--------------------------|------------------------|
| SAMN07153479  | 20155058     | MN    | 1                  | 28   | 1               | +           | -                    | <i>fbaA</i>                                | +            | +          | +          | -                | +     | +           | A,G,I,Z        | 1          | -                | 53            | 67319  | 161424                   | 1810947                |
| SAMN07154018  | 20160928     | TN    | 1                  | 28   | 1               | +           | -                    | <i>fbaA</i>                                | +            | +          | +          | -                | +     | +           | A,G,I,Z        | 1          | -                | 42            | 83989  | 302862                   | 1808729                |
| SAMN07152967  | 20151644     | GA    | 1                  | 28   | 1               | +           | -                    | <i>fbaA</i>                                | +            | +          | +          | -                | +     | +           | A,G,I,Z        | 1          | -                | 53            | 68410  | 194104                   | 1813886                |
| SAMN07152968  | 20151645     | GA    | 1                  | 28   | 1               | +           | -                    | <i>fbaA</i>                                | +            | +          | +          | -                | +     | +           | A,G,I,Z        | 1          | -                | 55            | 107087 | 271175                   | 1816470                |
| SAMN07152971  | 20151904     | GA    | 1                  | 28   | 1               | +           | -                    | <i>fbaA</i>                                | +            | +          | +          | -                | +     | +           | A,G,I,Z        | 1          | -                | 36            | 151216 | 327636                   | 1814064                |
| SAMN07152974  | 20152165     | GA    | 1                  | 28   | 1               | +           | -                    | <i>fbaA</i>                                | +            | +          | +          | -                | +     | +           | A,G,I,Z        | 1          | -                | 66            | 84061  | 248899                   | 1819322                |
| SAMN07152975  | 20152167     | GA    | 1                  | 28   | 1               | +           | -                    | <i>fbaA</i>                                | +            | +          | +          | -                | +     | +           | A,G,I,Z        | 1          | -                | 41            | 123312 | 273452                   | 1812444                |
| SAMN07152981  | 20152184     | GA    | 1                  | 28   | 1               | +           | -                    | <i>fbaA</i>                                | +            | +          | +          | -                | +     | +           | A,G,I,Z        | 1          | -                | 48            | 112508 | 246025                   | 1815756                |
| SAMN07152984  | 20152228     | NY    | 1                  | 28   | 1               | +           | -                    | <i>fbaA</i>                                | +            | +          | +          | -                | +     | +           | A,G,I,Z        | 1          | -                | 53            | 92579  | 208329                   | 1818222                |
| SAMN07152985  | 20152229     | NY    | 1                  | 28   | 1               | +           | -                    | <i>fbaA</i>                                | +            | +          | +          | -                | +     | +           | A,G,I,Z        | 1          | -                | 46            | 121855 | 229217                   | 1813717                |
| SAMN07152988  | 20152232     | NY    | 1                  | 28   | 1               | +           | -                    | <i>fbaA</i>                                | +            | +          | +          | -                | +     | +           | A,G,I,Z        | 1          | -                | 58            | 94924  | 196326                   | 1819553                |
| SAMN07152991  | 20152235     | NY    | 1                  | 28   | 1               | +           | -                    | <i>fbaA</i>                                | +            | +          | +          | -                | +     | +           | A,G,I,Z        | 1          | -                | 48            | 64121  | 203931                   | 1810923                |
| SAMN07152993  | 20152237     | NY    | 1                  | 28   | 1               | +           | -                    | <i>fbaA</i>                                | +            | +          | +          | -                | +     | +           | A,G,I,Z        | 1          | -                | 75            | 50273  | 123144                   | 1817169                |
| SAMN07152994  | 20152238     | NY    | 1                  | 28   | 1               | +           | -                    | <i>fbaA</i>                                | +            | +          | +          | -                | +     | +           | A,G,I,Z        | 1          | -                | 123           | 25412  | 74127                    | 1826381                |
| SAMN07153010  | 20152513     | MN    | 1                  | 28   | 1               | +           | -                    | <i>fbaA</i>                                | +            | +          | +          | -                | +     | +           | A,G,I,Z        | 1          | -                | 120           | 30540  | 65819                    | 1825362                |
| SAMN07153011  | 20152515     | MN    | 1                  | 28   | 1               | +           | -                    | <i>fbaA</i>                                | +            | +          | +          | -                | +     | +           | A,G,I,Z        | 1          | -                | 115           | 30992  | 100414                   | 1824399                |
| SAMN07153014  | 20152518     | MN    | 1                  | 28   | 1               | +           | -                    | <i>fbaA</i>                                | +            | +          | +          | -                | +     | +           | A,G,I,Z        | 1          | -                | 73            | 55125  | 161228                   | 1821969                |
| SAMN07153020  | 20152524     | MN    | 1                  | 28   | 1               | +           | -                    | <i>fbaA</i>                                | +            | +          | +          | -                | +     | +           | A,G,I,Z        | 1          | -                | 34            | 169471 | 327619                   | 1814673                |
| SAMN07153022  | 20152526     | MN    | 1                  | 28   | 1               | +           | -                    | <i>fbaA</i>                                | +            | +          | +          | -                | +     | +           | A,G,I,Z        | 1          | -                | 46            | 98384  | 203927                   | 1818861                |
| SAMN07153024  | 20152612     | GA    | 1                  | 28   | 1               | +           | -                    | <i>fbaA</i>                                | +            | -          | +          | -                | +     | +           | A,G,I,Z        | 1          | -                | 35            | 149434 | 327637                   | 1774459                |
| SAMN07153025  | 20152730     | NM    | 1                  | 28   | 1               | +           | -                    | <i>fbaA</i>                                | +            | +          | +          | -                | +     | +           | A,G,I          | 1          | <i>parC-D10G</i> | 27            | 271151 | 424316                   | 1814797                |
| SAMN07153048  | 20152758     | NM    | 1                  | 28   | 1               | +           | -                    | <i>fbaA</i>                                | +            | +          | +          | -                | +     | +           | A,G,I,Z        | 1          | -                | 44            | 151282 | 221668                   | 1816481                |
| SAMN07153057  | 20152767     | NM    | 1                  | 28   | 1               | +           | -                    | <i>fbaA</i>                                | +            | +          | +          | -                | +     | +           | A,G,I,Z        | 1          | -                | 32            | 203900 | 327708                   | 1814289                |
| SAMN07153058  | 20152787     | GA    | 1                  | 28   | 1               | +           | -                    | <i>fbaA</i>                                | +            | +          | +          | -                | +     | +           | A,G,I,Z        | 1          | -                | 37            | 205636 | 273452                   | 1816921                |
| SAMN07153059  | 20152788     | GA    | 1                  | 28   | 1               | +           | -                    | <i>fbaA</i>                                | +            | +          | +          | -                | +     | +           | A,G,I,Z        | 1          | -                | 36            | 221788 | 280624                   | 1817087                |
| SAMN07153069  | 20152837     | GA    | 1                  | 28   | 1               | +           | -                    | <i>fbaA</i>                                | +            | +          | +          | -                | +     | +           | A,G,I,Z        | 1          | -                | 33            | 203892 | 327616                   | 1815231                |
| SAMN07153085  | 20152993     | CT    | 1                  | 28   | 1               | +           | -                    | <i>fbaA</i>                                | +            | +          | +          | -                | +     | +           | A,G,I,Z        | 1          | -                | 66            | 66409  | 163661                   | 1816686                |
| SAMN07153090  | 20153043     | GA    | 1                  | 28   | 1               | +           | -                    | <i>fbaA</i>                                | +            | +          | +          | -                | +     | +           | A,G,I,Z        | 1          | -                | 43            | 116892 | 173793                   | 1810243                |
| SAMN07153092  | 20153045     | GA    | 1                  | 28   | 1               | +           | -                    | <i>fbaA</i>                                | +            | +          | +          | -                | +     | +           | A,G,I,Z        | 1          | -                | 56            | 66394  | 155768                   | 1813813                |
| SAMN07153093  | 20153046     | GA    | 1                  | 28   | 1               | +           | -                    | <i>fbaA</i>                                | +            | +          | +          | -                | +     | +           | A,G,I,Z        | 1          | -                | 101           | 33377  | 83921                    | 1825398                |
| SAMN07153094  | 20153047     | GA    | 1                  | 28   | 1               | +           | -                    | <i>fbaA</i>                                | +            | +          | +          | -                | +     | +           | A,G,I,Z        | 1          | -                | 34            | 271055 | 424287                   | 1806098                |
| SAMN07153098  | 20153090     | TN    | 1                  | 28   | 1               | +           | -                    | <i>fbaA</i>                                | +            | +          | +          | -                | +     | +           | A,G,I,Z        | 1          | -                | 33            | 113356 | 327634                   | 1808491                |
| SAMN07153099  | 20153091     | TN    | 1                  | 28   | 1               | +           | -                    | <i>fbaA</i>                                | +            | +          | +          | -                | +     | +           | A,G,I,Z        | 1          | -                | 46            | 113309 | 273468                   | 1811875                |
| SAMN07153100  | 20153093     | TN    | 1                  | 28   | 1               | +           | -                    | <i>fbaA</i>                                | +            | +          | +          | -                | +     | +           | A,G,I,Z        | 1          | -                | 36            | 123244 | 203872                   | 1808200                |
| SAMN07153101  | 20153094     | TN    | 1                  | 28   | 1               | +           | -                    | <i>fbaA</i>                                | +            | +          | +          | -                | +     | +           | A,G,I,Z        | 1          | -                | 29            | 151249 | 327613                   | 1807734                |
| SAMN07153102  | 20153095     | TN    | 1                  | 28   | 1               | +           | -                    | <i>fbaA</i>                                | +            | -          | +          | -                | +     | +           | A,G,I,Z        | 1          | -                | 31            | 151253 | 328014                   | 1767656                |
| SAMN07153103  | 20153096     | TN    | 1                  | 28   | 1               | +           | -                    | <i>fbaA</i>                                | +            | +          | +          | -                | +     | +           | A,G,I,Z        | 1          | -                | 32            | 143130 | 220404                   | 1808589                |
| SAMN07153117  | 20153111     | NY    | 1                  | 28   | 1               | +           | -                    | <i>fbaA</i>                                | +            | +          | +          | -                | +     | +           | A,G,I,Z        | 1          | -                | 22            | 203799 | 327675                   | 1809459                |
| SAMN07153118  | 20153112     | NY    | 1                  | 28   | 1               | +           | -                    | <i>fbaA</i>                                | +            | +          | +          | -                | +     | +           | A,G,I,Z        | 1          | -                | 37            | 108477 | 271123                   | 1809584                |
| SAMN07153120  | 20153145     | GA    | 1                  | 28   | 1               | +           | -                    | <i>fbaA</i>                                | +            | +          | +          | -                | +     | +           | A,G,I,Z        | 1          | -                | 37            | 97474  | 273496                   | 1812097                |
| SAMN07153121  | 20153146     | GA    | 1                  | 28   | 1               | +           | -                    | <i>fbaA</i>                                | +            | +          | +          | -                | +     | +           | A,G,I,Z        | 1          | -                | 32            | 203786 | 816889                   | 1805312                |
| SAMN07153126  | 20153439     | GA    | 1                  | 28   | 1               | +           | -                    | <i>fbaA</i>                                | +            | +          | +          | -                | +     | +           | A,G,I,Z        | 1          | -                | 32            | 151216 | 327572                   | 1805838                |

|              |          |    |   |    |   |   |   |             |   |   |   |   |   |   |         |    |   |    |        |        |         |
|--------------|----------|----|---|----|---|---|---|-------------|---|---|---|---|---|---|---------|----|---|----|--------|--------|---------|
| SAMN07153127 | 20153440 | GA | 1 | 28 | 1 | - | - | <i>fbaA</i> | + | + | + | - | + | + | A,G,I,Z | 1  | - | 37 | 151279 | 327598 | 1811860 |
| SAMN07153128 | 20153480 | NY | 1 | 28 | 1 | + | - | <i>fbaA</i> | + | + | + | - | + | + | A,G,I,Z | 1  | - | 28 | 119358 | 280614 | 1812116 |
| SAMN07153129 | 20153482 | NY | 1 | 28 | 1 | + | - | <i>fbaA</i> | + | + | + | - | + | + | A,G,I,Z | 1  | - | 46 | 115656 | 273499 | 1814734 |
| SAMN07153133 | 20153486 | NY | 1 | 28 | 1 | + | - | <i>fbaA</i> | + | + | + | - | + | + | A,G,I,Z | 1  | - | 65 | 67866  | 146213 | 1815133 |
| SAMN07153149 | 20153554 | GA | 1 | 28 | 1 | + | - | <i>fbaA</i> | + | + | + | - | + | + | A,G,I,Z | 1  | - | 31 | 151265 | 327601 | 1808648 |
| SAMN07153150 | 20153556 | GA | 1 | 28 | 1 | + | - | <i>fbaA</i> | + | + | + | - | + | + | A,G,I,Z | 1  | - | 43 | 147935 | 217889 | 1810668 |
| SAMN07153153 | 20153560 | GA | 1 | 28 | 1 | + | - | <i>fbaA</i> | + | + | + | - | + | + | A,G,I,Z | 1  | - | 45 | 97806  | 273472 | 1813127 |
| SAMN07153154 | 20153561 | GA | 1 | 28 | 1 | + | - | <i>fbaA</i> | + | + | + | - | + | + | A,G,I,Z | 1  | - | 37 | 135021 | 216414 | 1810528 |
| SAMN07153156 | 20153571 | NM | 1 | 28 | 1 | + | - | <i>fbaA</i> | + | + | + | - | + | + | A,G,I,Z | 1  | - | 42 | 203716 | 273284 | 1805662 |
| SAMN07153181 | 20153610 | CO | 1 | 28 | 1 | + | - | <i>fbaA</i> | + | + | + | - | + | + | A,G,I,Z | 10 | - | 38 | 113331 | 273459 | 1810420 |
| SAMN07153182 | 20153611 | CO | 1 | 28 | 1 | + | - | <i>fbaA</i> | + | + | + | - | + | + | A,G,I,Z | 1  | - | 38 | 134069 | 245989 | 1822941 |
| SAMN07153183 | 20153612 | CO | 1 | 28 | 1 | + | - | <i>fbaA</i> | + | + | + | - | + | + | A,G,I,Z | 1  | - | 60 | 67490  | 142728 | 1826639 |
| SAMN07153193 | 20153622 | CO | 1 | 28 | 1 | + | - | <i>fbaA</i> | + | + | + | - | + | + | A,G,I,Z | 1  | - | 35 | 97461  | 424299 | 1810946 |
| SAMN07153196 | 20153864 | GA | 1 | 28 | 1 | + | - | <i>fbaA</i> | + | + | + | - | + | + | A,G,I,Z | 1  | - | 36 | 161103 | 328069 | 1813290 |
| SAMN07153197 | 20153865 | GA | 1 | 28 | 1 | + | - | <i>fbaA</i> | + | + | + | - | + | + | A,G,I,Z | 1  | - | 33 | 221784 | 394923 | 1808747 |
| SAMN07153200 | 20154009 | CA | 1 | 28 | 1 | + | - | <i>fbaA</i> | + | + | + | - | + | + | A,G,I   | 1  | - | 37 | 246023 | 424556 | 1812137 |
| SAMN07153203 | 20154012 | CA | 1 | 28 | 1 | + | - | <i>fbaA</i> | + | + | + | - | + | + | A,G,I,Z | 1  | - | 34 | 203867 | 327622 | 1808952 |
| SAMN07153223 | 20154033 | CA | 1 | 28 | 1 | + | - | <i>fbaA</i> | + | + | + | - | + | + | A,G,I,Z | 1  | - | 34 | 144668 | 315981 | 1809829 |
| SAMN07153224 | 20154034 | CA | 1 | 28 | 1 | + | - | <i>fbaA</i> | + | + | + | - | + | + | A,G,I,Z | 1  | - | 36 | 204352 | 310663 | 1811812 |
| SAMN07153242 | 20154052 | CA | 1 | 28 | 1 | + | - | <i>fbaA</i> | + | - | - | - | + | + | A,G,I,Z | 1  | - | 37 | 151299 | 317579 | 1770883 |
| SAMN07153246 | 20154127 | MN | 1 | 28 | 1 | + | - | <i>fbaA</i> | + | + | + | - | + | + | A,G,I,Z | 1  | - | 30 | 271084 | 478743 | 1808461 |
| SAMN07153247 | 20154128 | MN | 1 | 28 | 1 | + | - | <i>fbaA</i> | + | + | + | - | + | + | A,G,I,Z | 1  | - | 34 | 203915 | 327674 | 1825990 |
| SAMN07153253 | 20154134 | MN | 1 | 28 | 1 | + | - | <i>fbaA</i> | + | + | + | - | + | + | A,G,I,Z | 1  | - | 33 | 123532 | 327009 | 1809081 |
| SAMN07153275 | 20154157 | MN | 1 | 28 | 1 | + | - | <i>fbaA</i> | + | + | + | - | + | + | A,G,I,Z | 1  | - | 36 | 127902 | 221763 | 1809930 |
| SAMN07153277 | 20154159 | MN | 1 | 28 | 1 | + | - | <i>fbaA</i> | + | + | + | - | + | + | A,G,I,Z | 1  | - | 32 | 221743 | 478810 | 1824619 |
| SAMN07153278 | 20154160 | MN | 1 | 28 | 1 | + | - | <i>fbaA</i> | + | + | + | - | + | + | A,G,I,Z | 1  | - | 38 | 118782 | 424613 | 1803493 |
| SAMN07153281 | 20154163 | MN | 1 | 28 | 1 | + | - | <i>fbaA</i> | + | + | + | - | + | + | A,G,I,Z | 1  | - | 31 | 221856 | 479225 | 1807505 |
| SAMN07153282 | 20154164 | MN | 1 | 28 | 1 | + | - | <i>fbaA</i> | + | + | + | - | + | + | A,G,I,Z | 1  | - | 34 | 203839 | 327641 | 1823510 |
| SAMN07153283 | 20154165 | MN | 1 | 28 | 1 | + | - | <i>fbaA</i> | + | + | + | - | + | + | A,G,I,Z | 1  | - | 32 | 203831 | 327578 | 1808173 |
| SAMN07153303 | 20154377 | NY | 1 | 28 | 1 | + | - | <i>fbaA</i> | + | + | + | - | + | + | A,G,I,Z | 1  | - | 41 | 123251 | 273443 | 1811295 |
| SAMN07153314 | 20154544 | CT | 1 | 28 | 1 | + | - | <i>fbaA</i> | + | - | + | - | + | + | A,G,I,Z | 1  | - | 45 | 118834 | 328622 | 1763797 |
| SAMN07153316 | 20154546 | CT | 1 | 28 | 1 | + | - | <i>fbaA</i> | + | - | + | - | + | + | A,G,I,Z | 1  | - | 57 | 76428  | 149288 | 1764409 |
| SAMN07153321 | 20154551 | CT | 1 | 28 | 1 | + | - | <i>fbaA</i> | + | + | + | - | + | + | A,G,I,Z | 1  | - | 34 | 147742 | 246232 | 1804804 |
| SAMN07153326 | 20154556 | CT | 1 | 28 | 1 | + | - | <i>fbaA</i> | + | + | + | - | + | + | A,G,I,Z | 1  | - | 58 | 55928  | 166493 | 1815603 |
| SAMN07153329 | 20154559 | CT | 1 | 28 | 1 | + | - | <i>fbaA</i> | + | + | + | - | + | + | A,G,I,Z | 1  | - | 40 | 195112 | 327647 | 1809766 |
| SAMN07153333 | 20154564 | CT | 1 | 28 | 1 | + | - | <i>fbaA</i> | + | + | + | - | + | + | A,G,I,Z | 1  | - | 36 | 221595 | 751723 | 1804813 |
| SAMN07153335 | 20154566 | CT | 1 | 28 | 1 | + | - | <i>fbaA</i> | + | + | - | - | + | + | A,G,I,Z | 1  | - | 26 | 271163 | 424317 | 1809097 |
| SAMN07153344 | 20154597 | TN | 1 | 28 | 1 | + | - | <i>fbaA</i> | + | + | + | - | + | + | A,G,I,Z | 1  | - | 38 | 119412 | 273433 | 1810146 |
| SAMN07153350 | 20154603 | TN | 1 | 28 | 1 | + | - | <i>fbaA</i> | + | + | + | - | + | + | A,G,I,Z | 1  | - | 30 | 203875 | 424342 | 1808049 |
| SAMN07153353 | 20154606 | TN | 1 | 28 | 1 | + | - | <i>fbaA</i> | + | + | + | - | + | + | A,G,I,Z | 1  | - | 34 | 151283 | 327643 | 1810579 |
| SAMN07153363 | 20154617 | TN | 1 | 28 | 1 | + | - | <i>fbaA</i> | + | + | + | - | + | + | A,G,I,Z | 1  | - | 28 | 271153 | 357196 | 1808315 |
| SAMN07153365 | 20154619 | GA | 1 | 28 | 1 | + | - | <i>fbaA</i> | + | - | + | - | + | + | A,G,I,Z | 1  | - | 44 | 115502 | 265929 | 1771493 |
| SAMN07153366 | 20154620 | GA | 1 | 28 | 1 | + | - | <i>fbaA</i> | + | + | + | - | + | + | A,G,I,Z | 1  | - | 38 | 151281 | 271179 | 1812496 |
| SAMN07153386 | 20154788 | CO | 1 | 28 | 1 | + | - | <i>fbaA</i> | + | + | + | - | + | + | A,G,I,Z | 1  | - | 32 | 221647 | 424233 | 1804731 |
| SAMN07153393 | 20154795 | CO | 1 | 28 | 1 | + | - | <i>fbaA</i> | + | + | + | - | + | + | A,G,I,Z | 10 | - | 34 | 203883 | 327644 | 1809349 |

|              |          |    |   |    |   |   |   |             |   |   |   |   |   |   |           |    |   |    |        |        |         |
|--------------|----------|----|---|----|---|---|---|-------------|---|---|---|---|---|---|-----------|----|---|----|--------|--------|---------|
| SAMN07153399 | 20154801 | CO | 1 | 28 | 1 | + | - | <i>fbaA</i> | + | + | + | - | + | + | A,G,I,Z   | 1  | - | 28 | 221719 | 327595 | 1808283 |
| SAMN07153405 | 20154807 | CO | 1 | 28 | 1 | + | - | <i>fbaA</i> | + | + | + | - | + | + | A,G,I,Z   | 10 | - | 41 | 98479  | 221864 | 1811919 |
| SAMN07153409 | 20154812 | CO | 1 | 28 | 1 | + | - | <i>fbaA</i> | + | + | + | - | + | + | A,G,I,Z   | 1  | - | 49 | 69945  | 163003 | 1813653 |
| SAMN07153421 | 20154945 | OR | 1 | 28 | 1 | + | - | <i>fbaA</i> | + | + | + | - | + | + | A,G,I,Z   | 1  | - | 35 | 120239 | 195250 | 1810778 |
| SAMN07153424 | 20154948 | OR | 1 | 28 | 1 | + | - | <i>fbaA</i> | + | + | + | - | + | + | A,G,I,Z   | 1  | - | 29 | 178171 | 300847 | 1809895 |
| SAMN07153430 | 20154962 | NY | 1 | 28 | 1 | + | - | <i>fbaA</i> | + | + | + | - | + | + | A,G,I,Z   | 1  | - | 29 | 221753 | 424310 | 1809893 |
| SAMN07153432 | 20154964 | NY | 1 | 28 | 1 | + | - | <i>fbaA</i> | + | + | + | - | + | + | A,G,I,Z   | 1  | - | 32 | 208307 | 273456 | 1810099 |
| SAMN07153445 | 20155022 | MN | 1 | 28 | 1 | + | - | <i>fbaA</i> | + | + | + | - | + | + | A,G,I,Z   | 1  | - | 93 | 118723 | 424553 | 1808821 |
| SAMN07153446 | 20155023 | MN | 1 | 28 | 1 | + | - | <i>fbaA</i> | + | + | + | - | + | + | G,I,Z     | 1  | - | 36 | 151276 | 273456 | 1801784 |
| SAMN07153449 | 20155026 | MN | 1 | 28 | 1 | + | - | <i>fbaA</i> | + | + | + | - | + | + | A,G,I,Z   | 1  | - | 33 | 151293 | 327670 | 1824811 |
| SAMN07153454 | 20155032 | MN | 1 | 28 | 1 | + | - | <i>fbaA</i> | + | + | - | - | + | + | A,G,I,Z   | 1  | - | 25 | 203864 | 327619 | 1812896 |
| SAMN07153465 | 20155043 | MN | 1 | 28 | 1 | + | - | <i>fbaA</i> | + | + | + | - | + | + | A,G,I,Z   | 1  | - | 32 | 221760 | 394877 | 1809137 |
| SAMN07153471 | 20155049 | MN | 1 | 28 | 1 | + | - | <i>fbaA</i> | + | + | + | - | + | + | A,G,I,Z   | 1  | - | 30 | 221700 | 424197 | 1806876 |
| SAMN07153473 | 20155052 | MN | 1 | 28 | 1 | + | - | <i>fbaA</i> | + | + | + | - | + | + | A,G,I,Z   | 1  | - | 39 | 114038 | 273425 | 1824676 |
| SAMN07153474 | 20155053 | MN | 1 | 28 | 1 | + | - | <i>fbaA</i> | + | + | + | - | + | + | A,G,I,Z   | 1  | - | 33 | 221711 | 478726 | 1845988 |
| SAMN07153478 | 20155057 | MN | 1 | 28 | 1 | + | - | <i>fbaA</i> | + | + | + | - | + | + | A,G,I,Z   | 1  | - | 46 | 181372 | 334762 | 1805334 |
| SAMN07153490 | 20155069 | MN | 1 | 28 | 1 | + | - | <i>fbaA</i> | + | + | + | - | + | + | A,G,I,Z   | 1  | - | 42 | 97706  | 203803 | 1806894 |
| SAMN07153493 | 20155193 | GA | 1 | 28 | 1 | + | - | <i>fbaA</i> | + | + | + | - | + | + | A,G,I,Z   | 1  | - | 85 | 50469  | 169828 | 1818315 |
| SAMN07153496 | 20155196 | GA | 1 | 28 | 1 | + | - | <i>fbaA</i> | + | + | + | - | + | + | A,G,I,Z   | 1  | - | 46 | 84022  | 276018 | 1813180 |
| SAMN07153498 | 20155198 | GA | 1 | 28 | 1 | + | - | <i>fbaA</i> | + | + | + | - | + | + | A,G,I,Z   | 1  | - | 53 | 97803  | 162161 | 1810913 |
| SAMN07153499 | 20155199 | GA | 1 | 28 | 1 | + | - | <i>fbaA</i> | + | + | + | - | + | + | A,G,I,Z   | 1  | - | 48 | 97425  | 151241 | 1811598 |
| SAMN07153508 | 20155211 | GA | 1 | 28 | 1 | + | - | <i>fbaA</i> | + | + | + | - | + | + | A,G,I,Z   | 1  | - | 70 | 56385  | 131951 | 1815630 |
| SAMN07153514 | 20155355 | CT | 1 | 28 | 1 | + | - | <i>fbaA</i> | + | + | + | - | + | + | A,G,I,Z   | 1  | - | 29 | 221743 | 327691 | 1809159 |
| SAMN07153517 | 20155358 | CT | 1 | 28 | 1 | + | - | <i>fbaA</i> | + | + | + | - | + | + | A,G,I,Z   | 1  | - | 36 | 178143 | 246547 | 1810653 |
| SAMN07153521 | 20155362 | CT | 1 | 28 | 1 | + | - | <i>fbaA</i> | + | + | + | - | + | + | A,G,I     | 1  | - | 30 | 221783 | 327623 | 1826212 |
| SAMN07153522 | 20155363 | CT | 1 | 28 | 1 | + | - | <i>fbaA</i> | + | + | + | - | + | + | A,G,I,Z   | 1  | - | 33 | 151279 | 221771 | 1809781 |
| SAMN07153527 | 20155368 | CT | 1 | 28 | 1 | + | - | <i>fbaA</i> | + | + | + | - | + | + | A,G,I,Z   | 1  | - | 38 | 150177 | 327641 | 1811725 |
| SAMN07153528 | 20155369 | CT | 1 | 28 | 1 | + | - | <i>fbaA</i> | + | + | + | - | + | + | A,G,I,Z   | 1  | - | 26 | 271099 | 424731 | 1806981 |
| SAMN07153529 | 20155370 | CT | 1 | 28 | 1 | - | - | <i>fbaA</i> | + | + | - | - | + | + | A,G,I,Z   | 1  | - | 37 | 221771 | 327632 | 1807533 |
| SAMN07153536 | 20155377 | CT | 1 | 28 | 1 | - | - | <i>fbaA</i> | + | - | + | - | + | + | A,G,I,Z   | 1  | - | 36 | 181743 | 327557 | 1771030 |
| SAMN07153541 | 20155382 | CT | 1 | 28 | 1 | + | - | <i>fbaA</i> | + | + | + | - | + | + | A,G,I,Z   | 1  | - | 34 | 221671 | 478717 | 1823275 |
| SAMN07153553 | 20155405 | NY | 1 | 28 | 1 | + | - | <i>fbaA</i> | + | + | + | - | + | + | A,G,I,Z   | 1  | - | 39 | 92515  | 293130 | 1806796 |
| SAMN07153559 | 20155411 | NY | 1 | 28 | 1 | + | - | <i>fbaA</i> | + | + | + | - | + | + | A,G,I,Z   | 1  | - | 45 | 194686 | 327618 | 1813465 |
| SAMN07153564 | 20155416 | NY | 1 | 28 | 1 | + | - | <i>fbaA</i> | + | + | + | - | + | + | A,G,I,Z   | 1  | - | 43 | 98316  | 275729 | 1811371 |
| SAMN07153566 | 20155418 | NY | 1 | 28 | 1 | + | - | <i>fbaA</i> | + | + | + | - | + | + | A,G,I,Z   | 1  | - | 36 | 146407 | 273386 | 1807867 |
| SAMN07153567 | 20155575 | TN | 1 | 28 | 1 | + | - | <i>fbaA</i> | + | + | + | - | + | + | A,G,I,Z   | 1  | - | 31 | 138258 | 273400 | 1812225 |
| SAMN07153569 | 20155577 | TN | 1 | 28 | 1 | + | - | <i>fbaA</i> | + | + | + | - | + | + | A,G,I,Z   | 1  | - | 38 | 128863 | 273472 | 1826891 |
| SAMN07153583 | 20155591 | TN | 1 | 28 | 1 | + | - | <i>fbaA</i> | + | + | + | - | + | + | A,G,I,Z   | 1  | - | 31 | 151229 | 273360 | 1805695 |
| SAMN07153585 | 20155593 | TN | 1 | 28 | 1 | + | - | <i>fbaA</i> | + | - | + | - | + | + | A,G,I,Z   | 1  | - | 38 | 100650 | 273488 | 1770692 |
| SAMN07153588 | 20155599 | MD | 1 | 28 | 1 | + | - | <i>fbaA</i> | + | - | + | - | + | + | A,G,I,Z   | 1  | - | 34 | 151245 | 327597 | 1767713 |
| SAMN07153593 | 20155604 | MD | 1 | 28 | 1 | + | - | <i>fbaA</i> | + | + | + | - | + | + | A,G,I,Z   | 1  | - | 32 | 149586 | 421047 | 1804879 |
| SAMN07153597 | 20155608 | MD | 1 | 28 | 1 | + | - | <i>fbaA</i> | + | + | + | - | + | + | A,G,I,Z   | 1  | - | 31 | 222043 | 327578 | 1814048 |
| SAMN07153602 | 20155613 | MD | 1 | 28 | 1 | + | - | <i>fbaA</i> | + | - | + | - | + | + | A,G,I,Z   | 1  | - | 35 | 163078 | 327645 | 1768953 |
| SAMN07153606 | 20155618 | MD | 1 | 28 | 1 | + | - | <i>fbaA</i> | + | + | + | - | + | + | A,C,G,I,Z | 1  | - | 50 | 92583  | 266091 | 1852676 |
| SAMN07153608 | 20155620 | MD | 1 | 28 | 1 | + | - | <i>fbaA</i> | + | - | + | - | + | + | A,G,I,Z   | 1  | - | 31 | 163110 | 327657 | 1768843 |

|              |          |    |   |    |   |   |   |             |   |   |   |   |   |   |           |   |   |    |        |        |         |
|--------------|----------|----|---|----|---|---|---|-------------|---|---|---|---|---|---|-----------|---|---|----|--------|--------|---------|
| SAMN07153609 | 20155621 | MD | 1 | 28 | 1 | + | - | <i>fbaA</i> | + | - | + | - | + | + | A,G,I,Z   | 1 | - | 29 | 163086 | 327653 | 1767629 |
| SAMN07153610 | 20155622 | MD | 1 | 28 | 1 | + | - | <i>fbaA</i> | + | + | + | - | + | + | A,G,I,Z   | 1 | - | 26 | 271147 | 424331 | 1808097 |
| SAMN07153611 | 20155623 | MD | 1 | 28 | 1 | + | - | -           | + | + | + | - | + | + | A,G,I,Z   | 1 | - | 33 | 123081 | 424680 | 1804885 |
| SAMN07153612 | 20155624 | MD | 1 | 28 | 1 | + | - | <i>fbaA</i> | + | + | + | - | + | + | A,G,I,Z   | 1 | - | 34 | 123239 | 203891 | 1807650 |
| SAMN07153614 | 20155626 | MD | 1 | 28 | 1 | + | - | <i>fbaA</i> | + | - | + | - | + | + | A,G,I,Z   | 1 | - | 35 | 138025 | 202396 | 1768870 |
| SAMN07153615 | 20155627 | MD | 1 | 28 | 1 | + | - | <i>fbaA</i> | + | + | + | - | + | + | A,G,I,Z   | 1 | - | 33 | 123267 | 258444 | 1807511 |
| SAMN07153617 | 20155629 | MD | 1 | 28 | 1 | + | - | <i>fbaA</i> | + | + | + | - | + | + | A,G,I,Z   | 1 | - | 31 | 119292 | 324180 | 1806322 |
| SAMN07153619 | 20155631 | MD | 1 | 28 | 1 | + | - | <i>fbaA</i> | + | + | + | - | + | + | A,G,I,Z   | 1 | - | 40 | 118990 | 256844 | 1808305 |
| SAMN07153622 | 20155634 | MD | 1 | 28 | 1 | + | - | <i>fbaA</i> | + | + | + | - | + | + | A,G,I,Z   | 1 | - | 36 | 123246 | 273472 | 1809776 |
| SAMN07153624 | 20155636 | MD | 1 | 28 | 1 | + | - | <i>fbaA</i> | + | - | + | - | + | + | A,G,I,Z   | 1 | - | 36 | 163098 | 327620 | 1769670 |
| SAMN07153631 | 20155643 | MD | 1 | 28 | 1 | - | - | <i>fbaA</i> | + | - | + | - | + | + | A,G,I,Z   | 1 | - | 29 | 160838 | 273441 | 1766145 |
| SAMN07153632 | 20155644 | MD | 1 | 28 | 1 | + | - | <i>fbaA</i> | + | + | + | - | + | + | A,G,I,Z   | 1 | - | 34 | 203830 | 327481 | 1808332 |
| SAMN07153633 | 20155645 | MD | 1 | 28 | 1 | + | - | <i>fbaA</i> | + | + | + | - | + | + | A,G,I,Z   | 1 | - | 30 | 221772 | 424322 | 1808489 |
| SAMN07153643 | 20155655 | MD | 1 | 28 | 1 | + | - | <i>fbaA</i> | + | + | + | - | + | + | A,G,I,Z   | 1 | - | 28 | 271155 | 424360 | 1808500 |
| SAMN07153647 | 20155659 | MD | 1 | 28 | 1 | + | - | <i>fbaA</i> | + | + | + | - | + | + | A,G,I,Z   | 1 | - | 31 | 203876 | 327634 | 1809296 |
| SAMN07153648 | 20155660 | MD | 1 | 28 | 1 | + | - | <i>fbaA</i> | + | + | + | - | + | + | A,G,I,Z   | 1 | - | 27 | 221658 | 751726 | 1803671 |
| SAMN07153650 | 20155662 | MD | 1 | 28 | 1 | + | - | <i>fbaA</i> | + | + | + | - | + | + | A,G,I,Z   | 1 | - | 31 | 203719 | 327631 | 1809626 |
| SAMN07153653 | 20156013 | GA | 1 | 28 | 1 | + | - | <i>fbaA</i> | + | + | + | - | + | + | A,G,I,Z   | 1 | - | 38 | 221656 | 424777 | 1808082 |
| SAMN07153677 | 20156156 | NY | 1 | 28 | 1 | + | - | <i>fbaA</i> | + | + | + | - | + | + | A,G,I,Z   | 1 | - | 31 | 203864 | 327634 | 1808053 |
| SAMN07153680 | 20156159 | NY | 1 | 28 | 1 | + | - | <i>fbaA</i> | + | + | + | - | + | + | A,G,I,Z   | 1 | - | 32 | 200805 | 327442 | 1803840 |
| SAMN07153689 | 20156168 | MN | 1 | 28 | 1 | + | - | <i>fbaA</i> | + | + | + | - | + | + | A,G,I,Z   | 1 | - | 37 | 114289 | 273591 | 1810076 |
| SAMN07153693 | 20156172 | MN | 1 | 28 | 1 | + | - | <i>fbaA</i> | + | + | + | - | + | + | A,G,I,Z   | 1 | - | 36 | 131818 | 273473 | 1810378 |
| SAMN07153697 | 20156176 | MN | 1 | 28 | 1 | + | - | <i>fbaA</i> | + | + | + | - | + | + | A,G,I,Z   | 1 | - | 30 | 123284 | 264007 | 1809364 |
| SAMN07153701 | 20156180 | MN | 1 | 28 | 1 | + | - | <i>fbaA</i> | + | + | + | - | + | + | A,G,I,Z   | 1 | - | 41 | 113445 | 323542 | 1800670 |
| SAMN07153712 | 20156191 | MN | 1 | 28 | 1 | + | - | <i>fbaA</i> | + | + | + | - | + | + | A,G,I,Z   | 1 | - | 30 | 168167 | 310758 | 1807589 |
| SAMN07153727 | 20156325 | GA | 1 | 28 | 1 | + | - | <i>fbaA</i> | + | + | + | - | + | + | A,G,I,K,Z | 1 | - | 49 | 202427 | 422628 | 1860817 |
| SAMN07153736 | 20156389 | CA | 1 | 28 | 1 | + | - | <i>fbaA</i> | + | + | + | - | + | + | A,G,I,Z   | 1 | - | 37 | 203590 | 424552 | 1800843 |
| SAMN07153740 | 20156393 | CA | 1 | 28 | 1 | + | - | <i>fbaA</i> | + | + | + | - | + | + | A,G,I,Z   | 1 | - | 44 | 92535  | 204678 | 1810248 |
| SAMN07153742 | 20156395 | CA | 1 | 28 | 1 | + | - | <i>fbaA</i> | + | + | + | - | + | + | A,G,I,Z   | 1 | - | 36 | 203623 | 424465 | 1801725 |
| SAMN07153744 | 20156397 | CA | 1 | 28 | 1 | + | - | <i>fbaA</i> | + | + | + | - | + | + | A,G,I,Z   | 1 | - | 29 | 178191 | 273464 | 1809572 |
| SAMN07153751 | 20156404 | CA | 1 | 28 | 1 | + | - | <i>fbaA</i> | + | + | + | - | + | + | A,G,I,Z   | 1 | - | 34 | 229382 | 424332 | 1810004 |
| SAMN07153760 | 20156416 | CA | 1 | 28 | 1 | - | - | <i>fbaA</i> | + | + | + | - | + | + | A,G,I,Z   | 1 | - | 41 | 124873 | 203931 | 1810906 |
| SAMN07153761 | 20156417 | CA | 1 | 28 | 1 | + | - | <i>fbaA</i> | + | + | + | - | + | + | A,G,I,Z   | 1 | - | 44 | 84312  | 332501 | 1811093 |
| SAMN07153762 | 20156418 | CA | 1 | 28 | 1 | + | - | <i>fbaA</i> | + | + | + | - | + | + | A,G,I,Z   | 1 | - | 40 | 119062 | 273743 | 1810795 |
| SAMN07153787 | 20156443 | CA | 1 | 28 | 1 | + | - | <i>fbaA</i> | + | + | + | - | + | + | A,G,I,Z   | 1 | - | 70 | 53215  | 92896  | 1817089 |
| SAMN07153797 | 20156453 | CA | 1 | 28 | 1 | + | - | <i>fbaA</i> | + | + | + | - | + | + | A,G,I,Z   | 1 | - | 40 | 122956 | 273659 | 1808188 |
| SAMN07153817 | 20156630 | TN | 1 | 28 | 1 | + | - | <i>fbaA</i> | + | + | + | - | + | + | A,G,I,Z   | 1 | - | 28 | 216784 | 327696 | 1809261 |
| SAMN07153819 | 20156632 | TN | 1 | 28 | 1 | + | - | <i>fbaA</i> | + | + | + | - | + | + | A,G,I,Z   | 1 | - | 30 | 222057 | 327638 | 1810003 |
| SAMN07153821 | 20156634 | TN | 1 | 28 | 1 | + | - | <i>fbaA</i> | + | + | + | - | + | + | A,G,I,Z   | 1 | - | 35 | 153082 | 327675 | 1808578 |
| SAMN07153825 | 20156638 | NY | 1 | 28 | 1 | + | - | <i>fbaA</i> | + | + | + | - | + | + | A,G,I,Z   | 1 | - | 37 | 204341 | 327694 | 1810784 |
| SAMN07153826 | 20156639 | NY | 1 | 28 | 1 | + | - | <i>fbaA</i> | + | + | - | - | + | + | A,G,I,Z   | 1 | - | 75 | 221634 | 478628 | 1816153 |
| SAMN07153836 | 20156712 | CT | 1 | 28 | 1 | + | - | <i>fbaA</i> | + | + | + | - | + | + | A,G,I,Z   | 1 | - | 32 | 221704 | 424330 | 1806952 |
| SAMN07153840 | 20156716 | CT | 1 | 28 | 1 | + | - | <i>fbaA</i> | + | + | + | - | + | + | A,G,I,Z   | 1 | - | 35 | 203844 | 273401 | 1809930 |
| SAMN07153845 | 20156721 | CT | 1 | 28 | 1 | + | - | <i>fbaA</i> | + | + | + | - | + | + | G,I,Z     | 1 | - | 50 | 66381  | 218999 | 1773881 |
| SAMN07153846 | 20156723 | CT | 1 | 28 | 1 | + | - | <i>fbaA</i> | + | - | + | - | + | + | A,G,I,Z   | 1 | - | 55 | 67842  | 150155 | 1774200 |

|              |          |    |   |    |   |   |   |                   |   |   |   |   |   |   |         |    |                                       |    |        |        |         |
|--------------|----------|----|---|----|---|---|---|-------------------|---|---|---|---|---|---|---------|----|---------------------------------------|----|--------|--------|---------|
| SAMN07153860 | 20156784 | MD | 1 | 28 | 1 | + | - | <i>fbaA</i>       | + | - | + | - | + | + | A,G,I,Z | 1  | -                                     | 57 | 68821  | 163122 | 1772904 |
| SAMN07153862 | 20156786 | MD | 1 | 28 | 1 | + | - | <i>fbaA</i>       | + | + | + | - | + | + | A,G,I,Z | 1  | -                                     | 52 | 88870  | 203920 | 1814353 |
| SAMN07153864 | 20156788 | MD | 1 | 28 | 1 | + | - | <i>fbaA</i>       | + | - | + | - | + | + | A,G,I,Z | 1  | -                                     | 39 | 123148 | 424840 | 1770229 |
| SAMN07153865 | 20156789 | MD | 1 | 28 | 1 | + | - | <i>fbaA</i>       | + | + | + | - | + | + | A,G,I,Z | 1  | -                                     | 34 | 203843 | 327549 | 1812918 |
| SAMN07153869 | 20156793 | MD | 1 | 28 | 1 | + | - | <i>fbaA</i>       | + | + | + | - | + | + | A,G,I,Z | 1  | -                                     | 40 | 118978 | 298927 | 1813370 |
| SAMN07153878 | 20160004 | CO | 1 | 28 | 1 | + | - | <i>fbaA</i>       | + | + | + | - | + | + | A,G,I,Z | 10 | -                                     | 36 | 123152 | 424849 | 1805954 |
| SAMN07153880 | 20160006 | CO | 1 | 28 | 1 | + | - | <i>fbaA</i>       | + | + | + | - | + | + | A,G,I,Z | 10 | -                                     | 97 | 123152 | 424844 | 1824323 |
| SAMN07153895 | 20160022 | CO | 1 | 28 | 1 | + | - | <i>fbaA</i>       | + | + | + | - | + | + | A,G,I,Z | 1  | -                                     | 40 | 123199 | 273787 | 1813959 |
| SAMN07153899 | 20160026 | CO | 1 | 28 | 1 | + | - | <i>fbaA</i>       | + | + | + | - | + | + | A,G,I,Z | 1  | -                                     | 32 | 221747 | 478792 | 1813575 |
| SAMN07153918 | 20160137 | NM | 1 | 28 | 1 | + | - | <i>fbaA</i>       | + | + | + | - | + | + | A,G,I,Z | 1  | <i>parC-D10G</i>                      | 31 | 203903 | 275738 | 1808914 |
| SAMN07153930 | 20160174 | GA | 1 | 28 | 1 | + | - | <i>fbaA</i>       | + | + | + | - | + | + | A,G,I,Z | 1  | -                                     | 33 | 204409 | 298895 | 1809432 |
| SAMN07153934 | 20160178 | GA | 1 | 28 | 1 | + | - | <i>fbaA</i>       | + | + | + | - | + | + | A,G,I,Z | 1  | -                                     | 42 | 138047 | 276170 | 1813897 |
| SAMN07153937 | 20160182 | GA | 1 | 28 | 1 | + | - | <i>fbaA</i>       | + | + | + | - | + | + | A,G,I,Z | 1  | -                                     | 30 | 222738 | 327599 | 1809681 |
| SAMN07153963 | 20160320 | MN | 1 | 28 | 1 | + | - | <i>fbaA</i>       | + | + | + | - | + | + | A,G,I,Z | 1  | -                                     | 32 | 221608 | 478681 | 1806412 |
| SAMN07153977 | 20160334 | MN | 1 | 28 | 1 | + | - | <i>fbaA</i>       | + | + | + | - | + | + | A,G,I,Z | 1  | -                                     | 34 | 204386 | 327618 | 1810472 |
| SAMN07153978 | 20160335 | MN | 1 | 28 | 1 | + | - | <i>fbaA</i>       | + | + | + | - | + | + | A,G,I,Z | 1  | -                                     | 33 | 204372 | 327627 | 1809737 |
| SAMN07153980 | 20160451 | GA | 1 | 28 | 1 | + | - | <i>fbaA</i>       | + | + | + | - | + | + | A,G,I,Z | 1  | -                                     | 33 | 203835 | 273403 | 1808852 |
| SAMN07153982 | 20160453 | GA | 1 | 28 | 1 | + | - | <i>fbaA</i>       | + | + | + | - | + | + | A,G,I,Z | 1  | -                                     | 28 | 222744 | 327603 | 1809643 |
| SAMN07153983 | 20160454 | GA | 1 | 28 | 1 | + | - | <i>fbaA</i>       | + | + | + | - | + | + | A,G,I,Z | 1  | -                                     | 36 | 221759 | 327629 | 1810402 |
| SAMN07154012 | 20160758 | MD | 1 | 28 | 1 | + | - | <i>fbaA</i>       | + | + | + | - | + | + | A,G,I,Z | 1  | -                                     | 34 | 203754 | 356796 | 1806605 |
| SAMN07154019 | 20160929 | TN | 1 | 28 | 1 | + | - | <i>fbaA</i>       | + | + | + | - | + | + | A,G,I,Z | 1  | -                                     | 24 | 203864 | 327634 | 1812855 |
| SAMN07154058 | 20160985 | GA | 1 | 28 | 1 | + | - | <i>fbaA</i>       | + | + | + | - | + | + | A,G,I,Z | 1  | -                                     | 36 | 204320 | 327592 | 1810395 |
| SAMN07154060 | 20160987 | GA | 1 | 28 | 1 | + | - | <i>fbaA</i>       | - | + | + | - | + | + | A,G,I,Z | 1  | -                                     | 29 | 221728 | 424343 | 1806779 |
| SAMN07154064 | 20161022 | NM | 1 | 28 | 1 | + | - | <i>fbaA</i>       | + | + | + | - | + | + | A,G,I,Z | 1  | -                                     | 27 | 222060 | 327609 | 1809226 |
| SAMN07154073 | 20161067 | CO | 1 | 28 | 1 | + | - | <i>fbaA</i>       | + | + | + | - | + | + | A,G,I,Z | 1  | -                                     | 29 | 221755 | 327626 | 1808979 |
| SAMN07154083 | 20161077 | CO | 1 | 28 | 1 | + | - | <i>fbaA</i>       | + | + | + | - | + | + | A,G,I,Z | 1  | -                                     | 28 | 188996 | 327606 | 1774413 |
| SAMN07154090 | 20161084 | CO | 1 | 28 | 1 | + | - | <i>fbaA</i>       | + | + | + | - | + | + | A,G,I,Z | 10 | -                                     | 38 | 203919 | 278721 | 1810279 |
| SAMN07154092 | 20161086 | CO | 1 | 28 | 1 | + | - | <i>fbaA</i>       | + | + | + | - | + | + | A,G,I,Z | 1  | -                                     | 31 | 178090 | 395140 | 1809119 |
| SAMN07154106 | 20161198 | OR | 1 | 28 | 1 | + | - | <i>fbaA</i>       | + | + | + | - | + | + | A,G,I,Z | 1  | -                                     | 30 | 271169 | 478825 | 1809596 |
| SAMN07154136 | 20161337 | NM | 1 | 28 | 1 | + | - | <i>fbaA</i>       | + | + | + | - | + | + | A,G,I,Z | 1  | -                                     | 39 | 221332 | 478585 | 1804247 |
| SAMN07154140 | 20161424 | MN | 1 | 28 | 1 | + | - | <i>fbaA</i>       | + | + | + | - | + | + | A,G,I,Z | 1  | -                                     | 39 | 204177 | 352176 | 1804981 |
| SAMN07154147 | 20161431 | MN | 1 | 28 | 1 | + | - | <i>fbaA</i>       | + | + | + | - | + | + | A,G,I,Z | 1  | -                                     | 33 | 203747 | 327542 | 1805920 |
| SAMN07154150 | 20161434 | MN | 1 | 28 | 1 | + | - | <i>fbaA</i>       | + | + | + | - | + | + | A,G,I,Z | 1  | <i>tetM, ant6-la, aph3-III, sat4A</i> | 32 | 267002 | 479239 | 1881571 |
| SAMN07154160 | 20161444 | MN | 1 | 28 | 1 | + | - | <i>fbaA</i>       | + | + | + | - | + | + | A,G,I,Z | 1  | -                                     | 33 | 151270 | 273543 | 1809262 |
| SAMN07154161 | 20161445 | MN | 1 | 28 | 1 | + | - | <i>fbaA</i>       | + | + | + | - | + | + | A,G,I,Z | 1  | -                                     | 33 | 203838 | 327585 | 1808757 |
| SAMN07154166 | 20161450 | MN | 1 | 28 | 1 | + | - | <i>fbaA</i>       | + | + | + | - | + | + | A,G,I,Z | 1  | -                                     | 27 | 222088 | 327643 | 1813789 |
| SAMN07154170 | 20161531 | GA | 1 | 28 | 1 | + | - | <i>fbaA</i>       | + | + | + | - | + | + | A,G,I,Z | 1  | -                                     | 40 | 221663 | 327587 | 1809151 |
| SAMN07154171 | 20161532 | GA | 1 | 28 | 1 | + | - | <i>fbaA</i>       | + | + | + | - | + | + | A,G,I,Z | 1  | -                                     | 45 | 119072 | 203688 | 1808021 |
| SAMN07154175 | 20161536 | GA | 1 | 28 | 1 | + | - | <i>fbaA</i>       | + | + | + | - | + | + | A,G,I,Z | 1  | -                                     | 64 | 203538 | 424386 | 1799498 |
| SAMN07154177 | 20161538 | GA | 1 | 28 | 1 | + | - | <i>fbaA</i>       | + | + | + | - | + | + | A,G,I,Z | 1  | -                                     | 52 | 118750 | 328200 | 1802424 |
| SAMN07154185 | 20161719 | MD | 1 | 28 | 1 | + | - | <i>fbaA</i>       | + | + | + | - | + | + | A,G,I,Z | 1  | -                                     | 70 | 54471  | 173985 | 1810434 |
| SAMN07154207 | 20161827 | OR | 1 | 28 | 1 | + | - | <i>fbaA, sfb1</i> | + | + | + | - | + | + | A,G,I,Z | 1  | -                                     | 61 | 83300  | 203797 | 1809010 |
| SAMN07154210 | 20161830 | OR | 1 | 28 | 1 | + | - | <i>fbaA</i>       | + | + | + | - | + | + | A,G,I,Z | 1  | -                                     | 64 | 66482  | 123200 | 1811648 |
| SAMN07154221 | 20161859 | TN | 1 | 28 | 1 | + | - | <i>fbaA</i>       | + | + | + | - | + | + | A,G,I,Z | 1  | -                                     | 26 | 222025 | 478769 | 1807582 |
| SAMN07154222 | 20161860 | TN | 1 | 28 | 1 | + | - | <i>fbaA</i>       | + | + | + | - | + | + | A,G,I,Z | 1  | -                                     | 29 | 221747 | 478792 | 1807730 |

|              |          |    |      |     |   |   |   |             |   |   |   |   |   |   |         |    |                                    |     |        |        |         |
|--------------|----------|----|------|-----|---|---|---|-------------|---|---|---|---|---|---|---------|----|------------------------------------|-----|--------|--------|---------|
| SAMN07154223 | 20161861 | TN | 1    | 28  | 1 | + | - | <i>fbaA</i> | + | + | + | - | + | + | A,G,I,Z | 1  | -                                  | 31  | 221778 | 751833 | 1809083 |
| SAMN07154227 | 20161865 | TN | 1    | 28  | 1 | + | - | <i>fbaA</i> | + | + | + | - | + | + | A,G,I,Z | 1  | -                                  | 33  | 119038 | 222186 | 1808705 |
| SAMN07154276 | 20162143 | CA | 1    | 28  | 1 | + | - | <i>fbaA</i> | + | + | + | - | + | + | A,G,I,Z | 1  | -                                  | 90  | 41113  | 127767 | 1809815 |
| SAMN07154286 | 20162154 | CA | 1    | 28  | 1 | + | - | <i>fbaA</i> | + | + | + | - | + | + | A,G,I,Z | 1  | -                                  | 38  | 123107 | 424822 | 1811230 |
| SAMN07154291 | 20162159 | CA | 1    | 28  | 1 | + | - | <i>fbaA</i> | + | + | + | - | + | + | A,G,I,Z | 1  | -                                  | 42  | 123152 | 424833 | 1812716 |
| SAMN07154292 | 20162270 | NM | 1    | 28  | 1 | + | - | <i>fbaA</i> | + | + | + | - | + | + | A,G,I,Z | 1  | -                                  | 56  | 92281  | 186355 | 1808941 |
| SAMN07154294 | 20162272 | NM | 1    | 28  | 1 | + | - | <i>fbaA</i> | + | + | + | - | + | + | A,G,I,Z | 1  | -                                  | 208 | 100362 | 145116 | 1830745 |
| SAMN07154319 | 20162427 | MN | 1    | 28  | 1 | + | - | <i>fbaA</i> | + | + | + | - | + | + | A,G,I,Z | 1  | -                                  | 65  | 123037 | 424625 | 1812676 |
| SAMN07154323 | 20162432 | MN | 1    | 28  | 1 | + | - | <i>fbaA</i> | + | + | + | - | + | + | A,G,I,Z | 1  | -                                  | 42  | 203810 | 327596 | 1829657 |
| SAMN07154327 | 20162597 | NM | 1    | 28  | 1 | + | - | <i>fbaA</i> | + | + | + | - | + | + | A,G,I,Z | 1  | -                                  | 29  | 221944 | 478689 | 1810838 |
| SAMN07154328 | 20162598 | NM | 1    | 28  | 1 | + | - | <i>fbaA</i> | + | + | + | - | + | + | A,G,I,Z | 1  | -                                  | 28  | 203804 | 410805 | 1816403 |
| SAMN07154340 | 20162640 | CO | 1    | 28  | 1 | + | - | <i>fbaA</i> | + | + | + | - | + | + | A,G,I,Z | 1  | -                                  | 36  | 123131 | 424801 | 1811304 |
| SAMN07154354 | 20162654 | CO | 1    | 28  | 1 | + | - | <i>fbaA</i> | + | + | + | - | + | + | A,G,I,Z | 1  | -                                  | 41  | 203799 | 394853 | 1814367 |
| SAMN07154360 | 20162660 | CO | 1    | 28  | 1 | + | - | <i>fbaA</i> | + | + | + | - | + | + | A,G,I,Z | 1  | -                                  | 33  | 221751 | 478801 | 1814371 |
| SAMN07154364 | 20162664 | CO | 1    | 28  | 1 | + | - | <i>fbaA</i> | + | + | + | - | + | + | A,G,I,Z | 1  | -                                  | 46  | 134837 | 376635 | 1823587 |
| SAMN07154372 | 20162672 | CO | 1    | 28  | 1 | + | - | <i>fbaA</i> | + | + | + | - | + | + | A,G,I,Z | 1  | -                                  | 35  | 123201 | 273728 | 1806803 |
| SAMN07154376 | 20162676 | CO | 1    | 28  | 1 | + | - | <i>fbaA</i> | + | + | + | - | + | + | A,G,I,Z | 10 | -                                  | 45  | 122977 | 273561 | 1809366 |
| SAMN07154385 | 20163038 | TN | 1    | 28  | 1 | + | - | <i>fbaA</i> | + | + | + | - | + | + | A,G,I,Z | 1  | -                                  | 37  | 115341 | 273440 | 1813214 |
| SAMN07154401 | 20164741 | TN | 1    | 28  | 1 | + | - | <i>fbaA</i> | + | + | + | - | + | + | A,G,I,Z | 1  | -                                  | 74  | 116871 | 273279 | 1816463 |
| SAMN07154403 | 20164911 | CO | 1    | 28  | 1 | + | - | <i>fbaA</i> | + | + | + | - | + | + | A,G,I,Z | 1  | -                                  | 262 | 53294  | 141374 | 1835710 |
| SAMN07154406 | 20164914 | CO | 1    | 28  | 1 | + | - | <i>fbaA</i> | + | + | + | - | + | + | A,G,I,Z | 1  | <i>ermB, tetM, aph3-III, sat4A</i> | 45  | 115611 | 273758 | 1878159 |
| SAMN07154408 | 20164916 | CO | 1    | 28  | 1 | - | - | <i>fbaA</i> | + | + | + | - | + | + | A,G,I,Z | 1  | -                                  | 36  | 102540 | 424813 | 1805644 |
| SAMN07154414 | 20164922 | CO | 1    | 28  | 1 | + | - | <i>fbaA</i> | + | + | + | - | + | + | A,G,I,Z | 1  | <i>ermB, tetM, aph3-III, sat4A</i> | 56  | 86700  | 127048 | 1878654 |
| SAMN07154416 | 20164924 | CO | 1    | 28  | 1 | + | - | <i>fbaA</i> | + | + | + | - | + | + | A,G,I,Z | 1  | -                                  | 62  | 203712 | 328847 | 1817630 |
| SAMN07153186 | 20153615 | CO | 1    | 785 | 1 | + | - | <i>fbaA</i> | + | + | + | - | + | + | A,G,I,Z | 1  | -                                  | 30  | 159215 | 327621 | 1807830 |
| SAMN07153119 | 20153143 | GA | 1    | 852 | 1 | + | - | <i>fbaA</i> | + | - | + | - | + | + | A,G,I,Z | 1  | -                                  | 39  | 115633 | 394928 | 1769388 |
| SAMN07153123 | 20153148 | GA | 1    | 852 | 1 | + | - | <i>fbaA</i> | + | - | + | - | + | + | A,G,I,Z | 1  | -                                  | 47  | 92591  | 263351 | 1774005 |
| SAMN07153327 | 20154557 | CT | 1    | 856 | 1 | + | - | <i>fbaA</i> | + | + | + | - | + | + | A,G,I,Z | 1  | -                                  | 37  | 123276 | 273472 | 1809648 |
| SAMN07153172 | 20153601 | CO | 1    | 858 | 1 | + | - | <i>fbaA</i> | + | + | + | - | + | + | A,G,I,Z | 1  | -                                  | 27  | 222787 | 327663 | 1809664 |
| SAMN07153385 | 20154787 | CO | 1    | 858 | 1 | + | - | <i>fbaA</i> | + | + | + | - | + | + | A,G,I,Z | 1  | -                                  | 32  | 132416 | 271125 | 1810934 |
| SAMN07153417 | 20154821 | CO | 1    | 858 | 1 | + | - | <i>fbaA</i> | + | + | + | - | + | + | A,G,I,Z | 1  | -                                  | 25  | 223131 | 327687 | 1815016 |
| SAMN07154071 | 20161065 | CO | 1    | 858 | 1 | + | - | <i>fbaA</i> | + | + | + | - | + | + | A,G,I,Z | 1  | -                                  | 28  | 222755 | 327624 | 1809175 |
| SAMN07154329 | 20162629 | CO | 1    | 858 | 1 | + | - | <i>fbaA</i> | + | + | + | - | + | + | A,G,I,Z | 1  | -                                  | 26  | 271113 | 478787 | 1813298 |
| SAMN07154344 | 20162644 | CO | 1    | 858 | 1 | + | - | <i>fbaA</i> | + | + | + | - | + | + | A,G,I,Z | 1  | -                                  | 29  | 203817 | 327672 | 1812082 |
| SAMN07154382 | 20163035 | TN | 1    | 858 | 1 | + | - | <i>fbaA</i> | + | + | + | - | + | + | A,G,I,Z | 1  | <i>tetM</i>                        | 42  | 98603  | 273773 | 1827661 |
| SAMN07154405 | 20164913 | CO | 1    | 858 | 1 | + | - | <i>fbaA</i> | + | + | + | - | + | + | A,G,I,Z | 1  | -                                  | 32  | 203877 | 327612 | 1813504 |
| SAMN07153758 | 20156414 | CA | 1    | 897 | 1 | + | - | <i>fbaA</i> | + | + | + | - | + | + | A,G,I,Z | 1  | -                                  | 44  | 121875 | 273472 | 1812187 |
| SAMN07154381 | 20163034 | TN | 1    | 898 | 1 | + | - | <i>fbaA</i> | + | + | + | - | + | + | A,G,I,Z | 1  | -                                  | 59  | 70682  | 118577 | 1803913 |
| SAMN07153401 | 20154803 | CO | 1    | 899 | 1 | + | - | <i>fbaA</i> | + | + | + | - | + | + | A,G,I,Z | 1  | -                                  | 41  | 212191 | 270979 | 1806558 |
| SAMN07153505 | 20155207 | GA | 1.18 | 28  | 1 | + | - | <i>fbaA</i> | + | + | + | - | + | + | A,G,I,Z | 1  | -                                  | 33  | 123120 | 424239 | 1804634 |
| SAMN07153091 | 20153044 | GA | 1.19 | 28  | 1 | + | - | <i>fbaA</i> | + | + | + | - | + | + | A,G,I   | 1  | <i>23S1-G10A</i>                   | 50  | 98618  | 222777 | 1814611 |
| SAMN07153305 | 20154379 | OR | 1.25 | 28  | 1 | + | - | <i>fbaA</i> | + | + | + | - | + | + | A,G,I,Z | 1  | -                                  | 34  | 119410 | 273750 | 1806998 |
| SAMN07153003 | 20152306 | OR | 1.25 | 28  | 1 | + | - | <i>fbaA</i> | + | + | + | - | + | + | A,G,I,Z | 1  | -                                  | 64  | 67409  | 149428 | 1817209 |
| SAMN07153005 | 20152309 | OR | 1.25 | 28  | 1 | + | - | <i>fbaA</i> | + | + | + | - | + | + | A,G,I,Z | 1  | -                                  | 82  | 46708  | 111508 | 1819137 |
| SAMN07153034 | 20152743 | NM | 1.25 | 28  | 1 | + | - | <i>fbaA</i> | + | + | + | - | + | + | A,G,I,Z | 1  | -                                  | 38  | 137923 | 273461 | 1816672 |

|              |          |    |      |    |   |   |   |             |   |   |   |   |   |   |         |   |                 |    |        |        |         |
|--------------|----------|----|------|----|---|---|---|-------------|---|---|---|---|---|---|---------|---|-----------------|----|--------|--------|---------|
| SAMN07153077 | 20152976 | OR | 1.25 | 28 | 1 | + | - | <i>fbaA</i> | + | + | + | - | + | + | A,G,I,Z | 1 | -               | 32 | 199106 | 327635 | 1816692 |
| SAMN07153081 | 20152980 | OR | 1.25 | 28 | 1 | + | - | <i>fbaA</i> | + | + | + | - | + | + | A,G,I,Z | 1 | -               | 34 | 204429 | 280603 | 1816780 |
| SAMN07153164 | 20153579 | NM | 1.25 | 28 | 1 | + | - | <i>fbaA</i> | + | + | + | - | + | + | A,G,I,Z | 1 | -               | 35 | 195205 | 327627 | 1811372 |
| SAMN07153165 | 20153580 | NM | 1.25 | 28 | 1 | + | - | <i>fbaA</i> | + | + | + | - | + | + | A,G,I,Z | 1 | -               | 37 | 221591 | 478636 | 1806648 |
| SAMN07153294 | 20154295 | NM | 1.25 | 28 | 1 | + | - | <i>fbaA</i> | + | + | + | - | + | + | A,G,I,Z | 1 | -               | 34 | 221703 | 414043 | 1808870 |
| SAMN07153309 | 20154383 | OR | 1.25 | 28 | 1 | + | - | <i>fbaA</i> | + | + | + | - | + | + | A,G,I,Z | 1 | -               | 31 | 221603 | 478653 | 1804850 |
| SAMN07153423 | 20154947 | OR | 1.25 | 28 | 1 | + | - | <i>fbaA</i> | + | + | + | - | + | + | A,G,I,Z | 1 | -               | 34 | 138284 | 273460 | 1810223 |
| SAMN07153427 | 20154951 | OR | 1.25 | 28 | 1 | + | - | <i>fbaA</i> | + | + | + | - | + | + | A,G,I,Z | 1 | -               | 33 | 204357 | 327591 | 1807852 |
| SAMN07153460 | 20155038 | MN | 1.25 | 28 | 1 | + | - | <i>fbaA</i> | + | + | + | - | + | + | A,G,I,Z | 1 | -               | 32 | 270900 | 478557 | 1803775 |
| SAMN07153548 | 20155389 | OR | 1.25 | 28 | 1 | + | - | <i>fbaA</i> | + | + | + | - | + | + | A,G,I,Z | 1 | -               | 29 | 222083 | 328947 | 1807972 |
| SAMN07153550 | 20155391 | OR | 1.25 | 28 | 1 | + | - | <i>fbaA</i> | + | + | + | - | + | + | A,G,I,Z | 1 | -               | 33 | 204588 | 327649 | 1809097 |
| SAMN07153635 | 20155647 | MD | 1.25 | 28 | 1 | + | - | <i>fbaA</i> | + | + | + | - | + | + | A,G,I,Z | 1 | -               | 38 | 169540 | 314668 | 1810194 |
| SAMN07153670 | 20156109 | NM | 1.25 | 28 | 1 | + | - | <i>fbaA</i> | + | + | + | - | + | + | A,G,I,Z | 1 | -               | 36 | 204271 | 327623 | 1809884 |
| SAMN07153741 | 20156394 | CA | 1.25 | 28 | 1 | + | - | <i>fbaA</i> | + | + | + | - | + | + | A,G,I,Z | 1 | -               | 47 | 102738 | 203898 | 1812305 |
| SAMN07153759 | 20156415 | CA | 1.25 | 28 | 1 | + | - | <i>fbaA</i> | + | + | + | - | + | + | A,G,I,Z | 1 | -               | 41 | 121024 | 269477 | 1811108 |
| SAMN07153768 | 20156424 | CA | 1.25 | 28 | 1 | + | - | <i>fbaA</i> | + | + | + | - | + | + | A,G,I,Z | 1 | -               | 39 | 113411 | 215002 | 1811815 |
| SAMN07153770 | 20156426 | CA | 1.25 | 28 | 1 | + | - | <i>fbaA</i> | + | + | + | - | + | + | A,G,I,Z | 1 | -               | 41 | 150007 | 221791 | 1812463 |
| SAMN07153807 | 20156596 | OR | 1.25 | 28 | 1 | + | - | <i>fbaA</i> | + | + | + | - | + | + | A,G,I,Z | 1 | -               | 29 | 271168 | 478825 | 1809820 |
| SAMN07153887 | 20160014 | CO | 1.25 | 28 | 1 | + | - | <i>fbaA</i> | + | + | + | - | + | + | A,G,I,Z | 1 | -               | 35 | 151349 | 246086 | 1811503 |
| SAMN07153962 | 20160319 | MN | 1.25 | 28 | 1 | + | - | <i>fbaA</i> | + | + | + | - | + | + | A,G,I,Z | 1 | -               | 33 | 220214 | 478701 | 1816681 |
| SAMN07154065 | 20161023 | NM | 1.25 | 28 | 1 | + | - | <i>fbaA</i> | + | + | + | - | + | + | A,G,I,Z | 1 | -               | 39 | 151258 | 327585 | 1810778 |
| SAMN07154105 | 20161197 | OR | 1.25 | 28 | 1 | + | - | <i>fbaA</i> | + | + | + | - | + | + | A,G,I,Z | 1 | -               | 34 | 221771 | 327717 | 1811340 |
| SAMN07154110 | 20161202 | OR | 1.25 | 28 | 1 | + | - | <i>fbaA</i> | + | + | + | - | + | + | A,G,I,Z | 1 | <i>parC-S6F</i> | 28 | 222078 | 327657 | 1808460 |
| SAMN07154263 | 20162130 | CA | 1.25 | 28 | 1 | + | - | <i>fbaA</i> | + | + | + | - | + | + | A,G,I,Z | 1 | -               | 35 | 221619 | 521341 | 1807323 |
| SAMN07154282 | 20162150 | CA | 1.25 | 28 | 1 | + | - | <i>fbaA</i> | + | + | + | - | + | + | A,G,I,Z | 1 | -               | 38 | 123088 | 273284 | 1809927 |
| SAMN07154349 | 20162649 | CO | 1.25 | 28 | 1 | + | - | <i>fbaA</i> | + | + | + | - | + | + | A,G,I,Z | 1 | -               | 36 | 119176 | 424890 | 1812879 |
| SAMN07153033 | 20152742 | NM | 1.29 | 28 | 1 | + | - | <i>fbaA</i> | + | + | - | - | + | + | A,G,I,Z | 1 | -               | 37 | 203908 | 280565 | 1813684 |
| SAMN07153191 | 20153620 | CO | 1.29 | 28 | 1 | + | - | <i>fbaA</i> | + | + | + | - | + | + | A,G,I,Z | 1 | -               | 29 | 222760 | 327617 | 1810483 |
| SAMN07153263 | 20154145 | MN | 1.29 | 28 | 1 | + | - | <i>fbaA</i> | + | + | + | - | + | + | A,G,I,Z | 1 | -               | 34 | 151280 | 273452 | 1811761 |
| SAMN07153687 | 20156166 | MN | 1.29 | 28 | 1 | + | - | <i>fbaA</i> | + | + | + | - | + | + | A,G,I,Z | 1 | -               | 34 | 203895 | 280531 | 1811758 |
| SAMN07153691 | 20156170 | MN | 1.29 | 28 | 1 | + | - | <i>fbaA</i> | + | + | + | - | + | + | A,G,I,Z | 1 | -               | 31 | 151282 | 273583 | 1809228 |
| SAMN07154163 | 20161447 | MN | 1.3  | 28 | 1 | + | - | <i>fbaA</i> | + | + | + | - | + | + | A,G,I,Z | 1 | -               | 38 | 151282 | 327603 | 1809255 |
| SAMN07153147 | 20153552 | GA | 1.33 | 28 | 1 | + | - | <i>fbaA</i> | + | + | + | - | + | + | A,G,I,Z | 1 | -               | 41 | 111516 | 203928 | 1812713 |
| SAMN07153377 | 20154661 | GA | 1.49 | 28 | 1 | + | - | <i>fbaA</i> | + | + | + | - | + | + | A,G,I,Z | 1 | -               | 38 | 119492 | 256655 | 1807482 |
| SAMN07153065 | 20152794 | GA | 1.49 | 28 | 1 | + | - | <i>fbaA</i> | + | + | + | - | + | + | A,G,I,Z | 1 | -               | 32 | 221775 | 327642 | 1816193 |
| SAMN07153088 | 20153041 | GA | 1.49 | 28 | 1 | + | - | <i>fbaA</i> | + | + | + | - | + | + | A,G,I,Z | 1 | -               | 33 | 128009 | 273476 | 1815142 |
| SAMN07153299 | 20154325 | GA | 1.49 | 28 | 1 | + | - | <i>fbaA</i> | + | + | + | - | + | + | A,G,I,Z | 1 | -               | 31 | 131476 | 327930 | 1809838 |
| SAMN07153300 | 20154326 | GA | 1.49 | 28 | 1 | + | - | <i>fbaA</i> | + | + | + | - | + | + | A,G,I,Z | 1 | -               | 40 | 115597 | 221539 | 1810400 |
| SAMN07153331 | 20154562 | CT | 1.49 | 28 | 1 | + | - | <i>fbaA</i> | + | + | + | - | + | + | A,G,I,Z | 1 | -               | 32 | 219487 | 327641 | 1810911 |
| SAMN07153369 | 20154623 | GA | 1.49 | 28 | 1 | + | - | <i>fbaA</i> | + | + | + | - | + | + | A,G,I,Z | 1 | -               | 31 | 149636 | 246804 | 1814372 |
| SAMN07153370 | 20154624 | GA | 1.49 | 28 | 1 | + | - | <i>fbaA</i> | + | + | + | - | + | + | A,G,I,Z | 1 | -               | 40 | 97810  | 273476 | 1816587 |
| SAMN07153436 | 20154968 | NY | 1.49 | 28 | 1 | + | - | <i>fbaA</i> | + | + | + | - | + | + | A,G,I,Z | 1 | -               | 31 | 221762 | 327621 | 1809626 |
| SAMN07153578 | 20155586 | TN | 1.49 | 28 | 1 | + | - | <i>fbaA</i> | + | + | + | - | + | + | A,G,I,Z | 1 | -               | 40 | 176480 | 327280 | 1807207 |
| SAMN07153657 | 20156020 | GA | 1.49 | 28 | 1 | + | - | <i>fbaA</i> | + | + | + | - | + | + | A,G,I,Z | 1 | -               | 31 | 151309 | 222086 | 1809159 |
| SAMN07154181 | 20161542 | GA | 1.49 | 28 | 1 | + | - | <i>fbaA</i> | + | - | + | - | + | + | A,G,I,Z | 1 | -               | 34 | 162999 | 364224 | 1771625 |

|              |          |    |      |    |   |   |                 |                       |   |   |   |   |   |   |             |    |   |    |        |        |         |
|--------------|----------|----|------|----|---|---|-----------------|-----------------------|---|---|---|---|---|---|-------------|----|---|----|--------|--------|---------|
| SAMN07153143 | 20153539 | OR | 1.6  | 28 | 1 | + | -               | <i>fbaA</i>           | + | + | + | - | + | + | A,G,J,Z     | 1  | - | 42 | 98289  | 267126 | 1812284 |
| SAMN07154173 | 20161534 | GA | 1.6  | 28 | 1 | + | -               | <i>fbaA</i>           | + | + | + | - | + | + | A,G,J,Z     | 1  | - | 34 | 204341 | 327543 | 1814807 |
| SAMN07153651 | 20156011 | GA | 1.98 | 28 | 1 | + | -               | <i>fbaA</i>           | + | + | + | - | + | + | A,C,G,J,S,Z | 1  | - | 36 | 122585 | 327582 | 1854982 |
| SAMN07154342 | 20162642 | CO | 1.99 | 28 | 1 | + | -               | <i>fbaA</i>           | + | + | + | - | + | + | A,G,J,Z     | 1  | - | 36 | 203864 | 327600 | 1814811 |
| SAMN07153002 | 20152305 | OR | 2    | 55 | 2 | + | <i>enn, mrp</i> | <i>fbaA, R28, sof</i> | + | - | - | - | - | + | C,G,K       | 1  | - | 98 | 46442  | 98001  | 1964926 |
| SAMN07153066 | 20152795 | GA | 2    | 55 | 2 | + | <i>enn, mrp</i> | <i>fbaA, R28, sof</i> | + | - | - | - | - | + | C,G,K       | 1  | - | 44 | 81274  | 259933 | 1996878 |
| SAMN07153122 | 20153147 | GA | 2    | 55 | 2 | + | <i>enn, mrp</i> | <i>fbaA, R28, sof</i> | + | - | - | - | - | + | C,G,K       | 12 | - | 42 | 94989  | 260539 | 1950617 |
| SAMN07153168 | 20153583 | NM | 2    | 55 | 2 | + | <i>enn, mrp</i> | <i>fbaA, sof</i>      | + | + | - | - | - | + | C,G         | 1  | - | 27 | 189945 | 262343 | 1874908 |
| SAMN07153206 | 20154015 | CA | 2    | 55 | 2 | + | <i>enn, mrp</i> | <i>fbaA, R28, sof</i> | + | - | - | - | - | + | C,G,K       | 1  | - | 42 | 103404 | 183565 | 1905166 |
| SAMN07153250 | 20154131 | MN | 2    | 55 | 2 | + | <i>enn, mrp</i> | <i>fbaA, R28, sof</i> | + | - | - | - | - | + | C,G,K       | 1  | - | 34 | 149595 | 378275 | 1904291 |
| SAMN07153267 | 20154149 | MN | 2    | 55 | 2 | + | <i>enn, mrp</i> | <i>fbaA, R28, sof</i> | + | - | - | - | - | + | C,G,K       | 1  | - | 38 | 122963 | 293488 | 1945178 |
| SAMN07153268 | 20154150 | MN | 2    | 55 | 2 | + | <i>enn, mrp</i> | <i>fbaA, R28, sof</i> | + | - | - | - | - | + | C,G,K       | 1  | - | 31 | 184095 | 343564 | 1902830 |
| SAMN07153273 | 20154155 | MN | 2    | 55 | 2 | + | <i>enn, mrp</i> | <i>fbaA, R28, sof</i> | + | - | - | - | - | + | C,G,K       | 1  | - | 30 | 163153 | 299380 | 1886551 |
| SAMN07153367 | 20154621 | GA | 2    | 55 | 2 | + | <i>enn, mrp</i> | <i>fbaA, R28, sof</i> | + | - | - | - | - | + | C,G,K       | 1  | - | 32 | 127600 | 456003 | 1943592 |
| SAMN07153374 | 20154629 | GA | 2    | 55 | 2 | + | <i>enn, mrp</i> | <i>fbaA, R28, sof</i> | + | - | - | - | - | + | C,G,K       | 1  | - | 42 | 93197  | 188030 | 1944669 |
| SAMN07153456 | 20155034 | MN | 2    | 55 | 2 | + | <i>enn, mrp</i> | <i>fbaA, R28, sof</i> | + | - | - | - | - | + | C,G,K       | 1  | - | 31 | 184121 | 370017 | 1903573 |
| SAMN07153482 | 20155061 | MN | 2    | 55 | 2 | + | <i>enn, mrp</i> | <i>fbaA, R28, sof</i> | + | + | - | - | - | + | C,G         | 1  | - | 28 | 184103 | 421706 | 1958475 |
| SAMN07153537 | 20155378 | CT | 2    | 55 | 2 | + | <i>enn, mrp</i> | <i>fbaA, R28, sof</i> | + | - | - | - | - | + | C,G,K       | 1  | - | 26 | 183575 | 259856 | 1901272 |
| SAMN07153538 | 20155379 | CT | 2    | 55 | 2 | + | <i>enn, mrp</i> | <i>fbaA, R28, sof</i> | + | - | - | - | - | + | C,G,K       | 1  | - | 21 | 252574 | 513175 | 1906462 |
| SAMN07153604 | 20155616 | MD | 2    | 55 | 2 | + | <i>enn, mrp</i> | <i>fbaA, R28, sof</i> | + | - | - | - | - | + | C,G,K       | 1  | - | 26 | 183337 | 428944 | 1954281 |
| SAMN07153630 | 20155642 | MD | 2    | 55 | 2 | + | <i>enn, mrp</i> | <i>fbaA, R28, sof</i> | + | - | - | - | - | + | C,G,K       | 1  | - | 38 | 96070  | 277607 | 1957445 |
| SAMN07153729 | 20156360 | NM | 2    | 55 | 2 | + | <i>enn, mrp</i> | <i>fbaA, R28, sof</i> | + | - | - | - | - | + | C,G,K       | 27 | - | 32 | 127608 | 426902 | 1947924 |
| SAMN07153771 | 20156427 | CA | 2    | 55 | 2 | + | <i>enn, mrp</i> | <i>fbaA, R28, sof</i> | + | - | - | - | - | + | C,G,K       | 1  | - | 37 | 102289 | 236034 | 1884367 |
| SAMN07153790 | 20156446 | CA | 2    | 55 | 2 | + | <i>enn, mrp</i> | <i>fbaA, R28, sof</i> | + | - | - | - | - | + | C,G,K       | 1  | - | 58 | 77810  | 183243 | 1910418 |
| SAMN07153931 | 20160175 | GA | 2    | 55 | 2 | + | <i>enn, mrp</i> | <i>fbaA, R28, sof</i> | + | - | - | - | - | + | C,G,K       | 1  | - | 41 | 92848  | 265406 | 1945470 |
| SAMN07154093 | 20161087 | CO | 2    | 55 | 2 | + | <i>enn, mrp</i> | <i>fbaA, R28, sof</i> | + | - | - | - | - | + | C,G         | 1  | - | 22 | 163180 | 343583 | 1857695 |
| SAMN07154125 | 20161240 | NY | 2    | 55 | 2 | + | <i>enn, mrp</i> | <i>fbaA, R28, sof</i> | + | - | - | - | - | + | C,G,K       | 1  | - | 33 | 184112 | 405115 | 1943595 |
| SAMN07154132 | 20161333 | NM | 2    | 55 | 2 | + | <i>mrp</i>      | <i>fbaA, R28, sof</i> | + | - | - | - | - | + | C,G,K       | 1  | - | 32 | 163132 | 339732 | 1954631 |
| SAMN07154172 | 20161533 | GA | 2    | 55 | 2 | + | <i>enn, mrp</i> | <i>fbaA, R28, sof</i> | + | - | - | - | - | + | C,G,K       | 12 | - | 41 | 110673 | 308584 | 1991061 |
| SAMN07154232 | 20161871 | TN | 2    | 55 | 2 | + | <i>enn, mrp</i> | <i>fbaA, R28, sof</i> | + | - | - | - | - | + | C,G,H,I,K   | 12 | - | 28 | 287790 | 460316 | 1953231 |
| SAMN07154322 | 20162430 | MN | 2    | 55 | 2 | + | <i>mrp</i>      | <i>fbaA, R28, sof</i> | + | - | - | - | - | + | C,G,K       | 1  | - | 49 | 116357 | 313546 | 1955242 |
| SAMN07154409 | 20164917 | CO | 2    | 55 | 2 | + | <i>enn, mrp</i> | <i>fbaA, R28, sof</i> | + | - | - | - | - | + | C,G,K       | 1  | - | 31 | 183798 | 472301 | 1936612 |
| SAMN07153694 | 20156173 | MN | 3.1  | 15 | 3 | + | -               | <i>prtF2</i>          | + | - | - | + | + | + | G,K,S       | 1  | - | 45 | 133133 | 328250 | 1832148 |
| SAMN07154316 | 20162424 | MN | 3.1  | 15 | 3 | + | -               | <i>prtF2</i>          | + | - | - | + | + | + | G,K,S       | 1  | - | 59 | 83016  | 182778 | 1837709 |
| SAMN07152972 | 20151906 | GA | 3.1  | 15 | 3 | + | -               | <i>prtF2</i>          | + | - | - | + | + | + | A,C,G,K     | 1  | - | 44 | 79041  | 196532 | 1840231 |
| SAMN07152973 | 20152164 | GA | 3.1  | 15 | 3 | + | -               | <i>prtF2</i>          | + | - | - | + | + | + | A,C,G,K,Z   | 1  | - | 93 | 42131  | 159004 | 1902974 |
| SAMN07153047 | 20152757 | NM | 3.1  | 15 | 3 | + | -               | <i>prtF2</i>          | + | - | - | + | + | + | A,C,G,K,Z   | 1  | - | 34 | 103286 | 485897 | 1844834 |
| SAMN07153169 | 20153597 | CO | 3.1  | 15 | 3 | + | -               | <i>prtF2</i>          | + | - | - | + | + | + | A,G,K,S     | 1  | - | 46 | 103261 | 442149 | 1869778 |
| SAMN07153252 | 20154133 | MN | 3.1  | 15 | 3 | + | -               | <i>prtF2</i>          | + | - | - | + | + | + | G,K,S       | 1  | - | 37 | 171332 | 442171 | 1835912 |
| SAMN07153284 | 20154166 | MN | 3.1  | 15 | 3 | + | -               | <i>prtF2</i>          | + | - | - | + | + | + | A,G,K,S     | 1  | - | 39 | 171204 | 442141 | 1866805 |
| SAMN07153397 | 20154799 | CO | 3.1  | 15 | 3 | + | -               | -                     | + | - | - | + | + | + | G,K,S,Z     | 1  | - | 43 | 163280 | 381188 | 1835917 |
| SAMN07153453 | 20155031 | MN | 3.1  | 15 | 3 | + | -               | <i>prtF2</i>          | + | - | - | + | + | + | A,G,K,S,Z   | 1  | - | 43 | 163319 | 442160 | 1869597 |
| SAMN07153463 | 20155041 | MN | 3.1  | 15 | 3 | + | -               | <i>prtF2</i>          | + | - | - | + | + | + | A,G,K       | 1  | - | 24 | 171740 | 442101 | 1792966 |
| SAMN07153467 | 20155045 | MN | 3.1  | 15 | 3 | + | -               | <i>prtF2</i>          | + | - | - | + | + | + | A,G,K,S     | 1  | - | 47 | 163294 | 440880 | 1871155 |
| SAMN07153475 | 20155054 | MN | 3.1  | 15 | 3 | + | -               | <i>prtF2</i>          | + | - | - | + | + | + | G,K,S,Z     | 1  | - | 41 | 144824 | 442177 | 1837016 |



|              |          |    |     |    |   |   |   |                 |                        |   |   |   |   |   |   |           |    |                             |     |        |        |         |
|--------------|----------|----|-----|----|---|---|---|-----------------|------------------------|---|---|---|---|---|---|-----------|----|-----------------------------|-----|--------|--------|---------|
| SAMN07153488 | 20155067 | MN | 3.1 | 15 | 3 | + | - |                 | <i>prtF2</i>           | + | - | - | + | + | + | G,K,S     | 1  | -                           | 43  | 138950 | 516641 | 1831897 |
| SAMN07153544 | 20155385 | CT | 3.1 | 15 | 3 | + | - |                 | <i>prtF2</i>           | + | - | - | + | + | + | A,C,G,K   | 1  | <i>mef, tetM, cat, msrD</i> | 34  | 133211 | 296910 | 1897585 |
| SAMN07153595 | 20155606 | MD | 3.1 | 15 | 3 | + | - |                 | <i>prtF2</i>           | + | - | - | + | + | + | A,G,S     | 1  | -                           | 42  | 165503 | 300881 | 1830462 |
| SAMN07153596 | 20155607 | MD | 3.1 | 15 | 3 | + | - |                 | <i>prtF2</i>           | + | - | - | + | + | + | A,G,K,S   | 1  | -                           | 40  | 171188 | 442095 | 1866135 |
| SAMN07153613 | 20155625 | MD | 3.1 | 15 | 3 | + | - | <i>enn</i>      | <i>prtF2</i>           | + | - | - | + | + | + | A,G,S     | 1  | -                           | 41  | 108094 | 159454 | 1826431 |
| SAMN07153616 | 20155628 | MD | 3.1 | 15 | 3 | + | - |                 | <i>prtF2</i>           | + | - | - | + | + | + | A,G,S     | 1  | -                           | 53  | 144278 | 228974 | 1830049 |
| SAMN07153618 | 20155630 | MD | 3.1 | 15 | 3 | + | - |                 | <i>prtF2</i>           | + | - | - | + | + | + | A,G,S     | 1  | -                           | 49  | 85621  | 262218 | 1829608 |
| SAMN07153623 | 20155635 | MD | 3.1 | 15 | 3 | + | - |                 | <i>prtF2</i>           | + | - | - | + | + | + | G,K,S     | 1  | -                           | 36  | 171284 | 432202 | 1835606 |
| SAMN07153634 | 20155646 | MD | 3.1 | 15 | 3 | + | - |                 | <i>prtF2</i>           | + | - | - | + | + | + | A,G,S     | 1  | -                           | 38  | 117131 | 432305 | 1826787 |
| SAMN07153638 | 20155650 | MD | 3.1 | 15 | 3 | + | - |                 | <i>prtF2</i>           | + | - | - | + | + | + | A,G,S     | 1  | -                           | 43  | 133220 | 241365 | 1829936 |
| SAMN07153683 | 20156162 | MN | 3.1 | 15 | 3 | + | - |                 | <i>prtF2</i>           | + | - | - | + | + | + | G,K,S     | 1  | -                           | 36  | 163336 | 442216 | 1845100 |
| SAMN07153705 | 20156184 | MN | 3.1 | 15 | 3 | + | - |                 | <i>prtF2</i>           | + | - | - | + | + | + | G,K,S     | 1  | -                           | 37  | 132761 | 442163 | 1839929 |
| SAMN07153763 | 20156419 | CA | 3.1 | 15 | 3 | + | - |                 | <i>prtF2</i>           | + | - | - | + | + | + | A,C,G,K,Z | 1  | <i>mef, tetM, cat, msrD</i> | 52  | 97856  | 194179 | 1901872 |
| SAMN07153844 | 20156720 | CT | 3.1 | 15 | 3 | + | - |                 | <i>prtF2</i>           | + | - | - | + | + | + | A,C,G,K   | 1  | <i>mef, tetM, cat, msrD</i> | 65  | 64659  | 131148 | 1868235 |
| SAMN07153854 | 20156778 | MD | 3.1 | 15 | 3 | + | - |                 | <i>prtF2</i>           | + | - | - | + | + | + | A,G,S     | 1  | -                           | 62  | 70591  | 181689 | 1831736 |
| SAMN07153855 | 20156779 | MD | 3.1 | 15 | 3 | + | - |                 | <i>prtF2</i>           | + | - | - | + | + | + | A,G,S,Z   | 1  | -                           | 55  | 81549  | 276975 | 1831261 |
| SAMN07153856 | 20156780 | MD | 3.1 | 15 | 3 | + | - |                 | <i>prtF2</i>           | + | - | - | + | + | + | A,G,S,Z   | 1  | -                           | 64  | 77089  | 251003 | 1832821 |
| SAMN07153964 | 20160321 | MN | 3.1 | 15 | 3 | + | - |                 | <i>prtF2</i>           | + | - | - | + | + | + | A,C,G,K   | 1  | -                           | 38  | 130914 | 230352 | 1837291 |
| SAMN07154007 | 20160753 | MD | 3.1 | 15 | 3 | + | - |                 | <i>prtF2</i>           | + | - | - | + | + | + | A,G,S,Z   | 1  | -                           | 29  | 197243 | 442167 | 1831544 |
| SAMN07154145 | 20161429 | MN | 3.1 | 15 | 3 | + | - |                 | <i>prtF2</i>           | + | - | - | + | + | + | G,K,S     | 1  | -                           | 39  | 171268 | 248054 | 1833542 |
| SAMN07154154 | 20161438 | MN | 3.1 | 15 | 3 | + | - |                 | <i>prtF2</i>           | + | - | - | + | + | + | G,K,S     | 1  | -                           | 31  | 171196 | 516997 | 1836932 |
| SAMN07154217 | 20161837 | OR | 3.1 | 15 | 3 | + | - |                 | <i>prtF2</i>           | + | - | - | + | + | + | A,C,G,K   | 1  | -                           | 77  | 53596  | 188923 | 1855190 |
| SAMN07154295 | 20162273 | NM | 3.1 | 15 | 3 | + | - |                 | <i>prtF2</i>           | + | - | - | + | + | + | A,C,G,K   | 1  | <i>mef, msrD</i>            | 33  | 181441 | 276238 | 1847988 |
| SAMN07154357 | 20162657 | CO | 3.1 | 15 | 3 | + | - |                 | <i>prtF2</i>           | + | - | - | + | + | + | G,K,S,Z   | 1  | -                           | 83  | 65933  | 218874 | 1834605 |
| SAMN07154373 | 20162673 | CO | 3.1 | 15 | 3 | + | - |                 | <i>prtF2</i>           | + | - | - | + | + | + | G,K,S     | 1  | -                           | 59  | 171136 | 442094 | 1836920 |
| SAMN07154340 | 20154813 | CO | 3.4 | 15 | 3 | + | - |                 | <i>prtF2</i>           | + | - | - | + | + | + | A,G,S     | 1  | -                           | 43  | 170631 | 417268 | 1829038 |
| SAMN07154178 | 20161539 | GA | 4   | 39 | 4 | + | + | <i>enn, mrp</i> | <i>fbaA, sfb1, sof</i> | - | - | - | - | + | + | C,S,Z     | 1  | -                           | 52  | 83574  | 164443 | 1840159 |
| SAMN07154199 | 20161733 | MD | 4   | 39 | 4 | + | + | <i>enn, mrp</i> | <i>fbaA, sfb1, sof</i> | - | - | - | - | + | + | C,S,Z     | 1  | -                           | 48  | 87016  | 202090 | 1833918 |
| SAMN07154216 | 20161836 | OR | 4   | 39 | 4 | + | + | <i>enn, mrp</i> | <i>fbaA, sfb1, sof</i> | - | - | - | - | + | + | C,S,Z     | 1  | -                           | 51  | 106534 | 250445 | 1834189 |
| SAMN07152965 | 20151534 | GA | 4   | 39 | 4 | + | + | <i>enn, mrp</i> | <i>fbaA, sfb1, sof</i> | - | - | - | - | + | + | C,S,Z     | 1  | -                           | 76  | 53314  | 131001 | 1843597 |
| SAMN07152978 | 20152180 | GA | 4   | 39 | 4 | + | + | <i>enn, mrp</i> | <i>fbaA, sfb1, sof</i> | - | - | - | - | + | + | C,S,Z     | 10 | <i>ermT</i>                 | 79  | 47834  | 120353 | 1847182 |
| SAMN07153016 | 20152520 | MN | 4   | 39 | 4 | + | + | <i>enn, mrp</i> | <i>fbaA, sfb1, sof</i> | - | - | - | - | + | + | C,S,Z     | 10 | <i>ermT</i>                 | 129 | 25524  | 97171  | 1815323 |
| SAMN07153060 | 20152789 | GA | 4   | 39 | 4 | + | + | <i>enn, mrp</i> | <i>fbaA, sfb1, sof</i> | - | - | - | - | + | + | C,S,Z     | 1  | <i>ermT</i>                 | 44  | 100034 | 211433 | 1805769 |
| SAMN07153072 | 20152971 | OR | 4   | 39 | 4 | + | + | <i>enn, mrp</i> | <i>fbaA, sfb1, sof</i> | - | - | - | - | + | + | C,S,Z     | 1  | -                           | 45  | 99791  | 230601 | 1843532 |
| SAMN07153104 | 20153097 | TN | 4   | 39 | 4 | + | + | <i>enn, mrp</i> | <i>fbaA, sfb1, sof</i> | - | - | - | - | + | + | C,S,Z     | 1  | -                           | 65  | 106982 | 250369 | 1867189 |
| SAMN07153130 | 20153483 | NY | 4   | 39 | 4 | + | + | <i>enn, mrp</i> | <i>fbaA, sfb1, sof</i> | - | - | - | - | + | + | C,S,Z     | 1  | -                           | 41  | 162815 | 335289 | 1901186 |
| SAMN07153234 | 20154044 | CA | 4   | 39 | 4 | + | + | <i>enn, mrp</i> | <i>fbaA, sfb1, sof</i> | - | - | - | - | + | + | C,S,Z     | 1  | -                           | 42  | 140968 | 250196 | 1837793 |
| SAMN07153254 | 20154135 | MN | 4   | 39 | 4 | + | + | <i>enn, mrp</i> | <i>fbaA, sfb1, sof</i> | - | - | - | - | + | + | C,S,Z     | 1  | -                           | 38  | 106568 | 250329 | 1835306 |
| SAMN07153257 | 20154138 | MN | 4   | 39 | 4 | + | + | <i>enn, mrp</i> | <i>fbaA, sfb1, sof</i> | - | - | - | - | + | + | A,C,S,Z   | 1  | <i>ermT</i>                 | 53  | 99795  | 211400 | 1880269 |
| SAMN07153285 | 20154167 | MN | 4   | 39 | 4 | + | + | <i>enn, mrp</i> | <i>fbaA, sfb1, sof</i> | - | - | - | - | + | + | C,S,Z     | 10 | <i>ermT</i>                 | 41  | 84212  | 211387 | 1796799 |
| SAMN07153304 | 20154378 | NY | 4   | 39 | 4 | + | + | <i>enn, mrp</i> | <i>fbaA, sfb1, sof</i> | - | - | - | - | + | + | C,S,Z     | 1  | -                           | 40  | 144161 | 250181 | 1790442 |
| SAMN07153306 | 20154380 | OR | 4   | 39 | 4 | + | + | <i>enn, mrp</i> | <i>fbaA, sfb1, sof</i> | - | - | - | - | + | + | C,S,Z     | 1  | -                           | 61  | 66140  | 127740 | 1841726 |
| SAMN07153357 | 20154610 | TN | 4   | 39 | 4 | + | + | <i>enn, mrp</i> | <i>fbaA, sfb1, sof</i> | - | - | - | - | + | + | C,S,Z     | 1  | -                           | 36  | 157496 | 250262 | 1832435 |
| SAMN07153402 | 20154804 | CO | 4   | 39 | 4 | + | + | <i>enn, mrp</i> | <i>fbaA, sfb1, sof</i> | - | - | - | - | + | + | C,S,Z     | 1  | -                           | 39  | 156694 | 282138 | 1834462 |
| SAMN07153404 | 20154806 | CO | 4   | 39 | 4 | + | + | <i>enn, mrp</i> | <i>fbaA, sfb1, sof</i> | - | - | - | - | + | + | C,S,Z     | 10 | <i>ermT</i>                 | 34  | 121213 | 250380 | 1802947 |

|              |          |    |       |     |   |   |          |                 |   |   |   |   |   |   |           |    |          |     |        |        |         |
|--------------|----------|----|-------|-----|---|---|----------|-----------------|---|---|---|---|---|---|-----------|----|----------|-----|--------|--------|---------|
| SAMN07153433 | 20154965 | NY | 4     | 39  | 4 | + | enn, mrp | fbaA, sfb1, sof | - | - | - | - | + | + | C,S,Z     | 10 | ermT     | 42  | 108750 | 236040 | 1800306 |
| SAMN07153455 | 20155033 | MN | 4     | 39  | 4 | + | enn, mrp | fbaA, sfb1, sof | - | - | - | - | + | + | C,S,Z     | 10 | ermT     | 34  | 156720 | 282037 | 1801197 |
| SAMN07153472 | 20155050 | MN | 4     | 39  | 4 | + | enn, mrp | fbaA, sfb1, sof | - | - | - | - | + | + | C,S,Z     | 1  | ermT     | 39  | 121282 | 250211 | 1798541 |
| SAMN07153484 | 20155063 | MN | 4     | 39  | 4 | + | enn, mrp | fbaA, sfb1, sof | - | - | - | - | + | + | C,S,Z     | 10 | ermT     | 41  | 79543  | 183846 | 1798643 |
| SAMN07153491 | 20155070 | MN | 4     | 39  | 4 | + | enn, mrp | fbaA, sfb1, sof | - | - | - | - | + | + | C,S,Z     | 10 | ermT     | 52  | 84241  | 163123 | 1799007 |
| SAMN07153506 | 20155208 | GA | 4     | 39  | 4 | + | enn, mrp | fbaA, sfb1, sof | - | - | - | - | + | + | C,S,Z     | 1  | -        | 58  | 66103  | 206580 | 1838294 |
| SAMN07153555 | 20155407 | NY | 4     | 39  | 4 | + | enn, mrp | fbaA, sfb1, sof | - | - | - | - | + | + | C,S,Z     | 1  | -        | 45  | 156720 | 282036 | 1793421 |
| SAMN07153594 | 20155605 | MD | 4     | 39  | 4 | + | enn, mrp | fbaA, sfb1, sof | - | - | - | - | + | + | C,S,Z     | 1  | -        | 33  | 163192 | 279631 | 1835938 |
| SAMN07153637 | 20155649 | MD | 4     | 39  | 4 | + | enn, mrp | fbaA, sfb1, sof | - | - | - | - | + | + | C,S,Z     | 1  | -        | 41  | 100050 | 250261 | 1835356 |
| SAMN07153642 | 20155654 | MD | 4     | 39  | 4 | + | enn, mrp | fbaA, sfb1, sof | - | - | - | - | + | + | C,S,Z     | 10 | ermT     | 64  | 54182  | 211411 | 1805278 |
| SAMN07153700 | 20156179 | MN | 4     | 39  | 4 | + | enn, mrp | fbaA, sfb1, sof | - | - | - | - | + | + | C,S,Z     | 10 | ermT     | 43  | 84803  | 211287 | 1799230 |
| SAMN07153703 | 20156182 | MN | 4     | 39  | 4 | + | enn, mrp | fbaA, sfb1, sof | - | - | - | - | + | + | C,S,Z     | 1  | ermT     | 49  | 80016  | 250235 | 1801716 |
| SAMN07153788 | 20156444 | CA | 4     | 39  | 4 | + | enn, mrp | fbaA, sfb1      | - | - | - | - | + | + | C,S,Z     | 1  | -        | 48  | 78936  | 168115 | 1833899 |
| SAMN07153814 | 20156626 | TN | 4     | 39  | 4 | + | enn, mrp | fbaA, sfb1, sof | - | - | - | - | + | + | C,S       | 7  | -        | 38  | 156812 | 250376 | 1836342 |
| SAMN07153861 | 20156785 | MD | 4     | 39  | 4 | + | enn, mrp | fbaA, sfb1, sof | - | - | - | - | + | + | C,S,Z     | 10 | ermT     | 42  | 106548 | 211152 | 1797658 |
| SAMN07153961 | 20160318 | MN | 4     | 39  | 4 | + | enn, mrp | fbaA, sfb1, sof | - | - | - | - | + | + | C,S,Z     | 10 | ermT     | 32  | 119938 | 250310 | 1797907 |
| SAMN07154015 | 20160761 | MD | 4     | 39  | 4 | + | enn, mrp | fbaA, sfb1, sof | - | - | - | - | + | + | C,S,Z     | 10 | ermT     | 41  | 163192 | 250532 | 1801665 |
| SAMN07154036 | 20160950 | CT | 4     | 39  | 4 | + | enn, mrp | fbaA, sfb1, sof | - | - | - | - | + | + | C,S,Z     | 1  | -        | 42  | 90265  | 166390 | 1838665 |
| SAMN07154066 | 20161024 | NM | 4     | 39  | 4 | + | enn, mrp | fbaA, sfb1, sof | - | - | - | - | + | + | C,S,Z     | 1  | -        | 36  | 174676 | 334446 | 1833025 |
| SAMN07154076 | 20161070 | CO | 4     | 39  | 4 | + | enn, mrp | fbaA, sfb1, sof | - | - | - | - | + | + | C,S,Z     | 10 | ermT     | 35  | 156780 | 334552 | 1797492 |
| SAMN07154102 | 20161096 | CO | 4     | 39  | 4 | + | enn, mrp | fbaA, sfb1, sof | - | - | - | - | + | + | C,S,Z     | 1  | -        | 34  | 156728 | 334310 | 1795661 |
| SAMN07154112 | 20161204 | OR | 4     | 39  | 4 | + | enn, mrp | fbaA, sfb1, sof | - | - | - | - | + | + | C,S,Z     | 1  | -        | 53  | 76856  | 211456 | 1835795 |
| SAMN07154143 | 20161427 | MN | 4     | 39  | 4 | + | enn, mrp | fbaA, sfb1, sof | - | - | - | - | + | + | C,S,Z     | 10 | ermT     | 33  | 163021 | 334401 | 1799514 |
| SAMN07154156 | 20161440 | MN | 4     | 39  | 4 | + | enn, mrp | fbaA, sfb1, sof | - | - | - | - | + | + | C,S,Z     | 10 | ermT     | 33  | 156732 | 334530 | 1802051 |
| SAMN07154186 | 20161720 | MD | 4     | 39  | 4 | + | enn, mrp | fbaA, sfb1, sof | - | - | - | - | + | + | C,S,Z     | 1  | -        | 41  | 163189 | 250241 | 1842086 |
| SAMN07154189 | 20161723 | MD | 4     | 39  | 4 | + | enn, mrp | fbaA, sfb1, sof | - | - | - | - | + | + | C,S,Z     | 1  | -        | 64  | 64800  | 139033 | 1832129 |
| SAMN07154198 | 20161732 | MD | 4     | 39  | 4 | + | enn, mrp | fbaA, sfb1, sof | - | - | - | - | + | + | C,S,Z     | 1  | ermT     | 237 | 15376  | 64754  | 1867894 |
| SAMN07154255 | 20162122 | CA | 4     | 39  | 4 | + | enn, mrp | fbaA, sfb1, sof | - | - | - | - | + | + | C,S,Z     | 1  | -        | 38  | 144186 | 212372 | 1797685 |
| SAMN07154305 | 20162413 | MN | 4     | 39  | 4 | + | enn, mrp | fbaA, sfb1, sof | - | - | - | - | + | + | C,S,Z     | 1  | -        | 55  | 126048 | 298289 | 1839547 |
| SAMN07154307 | 20162415 | MN | 4     | 39  | 4 | + | enn, mrp | fbaA, sfb1, sof | - | - | - | - | + | + | C,S,Z     | 1  | ermT     | 53  | 106422 | 211264 | 1801732 |
| SAMN07154370 | 20162670 | CO | 4     | 39  | 4 | + | enn, mrp | fbaA, sfb1, sof | - | - | - | - | + | + | C,S,Z     | 1  | -        | 55  | 133609 | 334483 | 1840101 |
| SAMN07154400 | 20164740 | TN | 4     | 39  | 4 | + | enn, mrp | fbaA, sfb1, sof | - | - | - | - | + | + | C,S,Z     | 1  | -        | 48  | 163019 | 250179 | 1837094 |
| SAMN07154410 | 20164918 | CO | 4     | 911 | 4 | + | enn, mrp | fbaA, sfb1, sof | - | - | - | - | + | + | C,S,Z     | 1  | ermT     | 51  | 156608 | 250227 | 1798305 |
| SAMN07153469 | 20155047 | MN | 5.128 | 99  | 5 | + | -        | prtF2           | + | - | - | - | - | - | C,G,Z     | 1  | -        | 45  | 223264 | 265587 | 1809101 |
| SAMN07153468 | 20155046 | MN | 5.18  | 99  | 5 | + | -        | prtF2           | + | - | - | - | - | - | C,G,Z     | 1  | -        | 36  | 199675 | 265631 | 1807952 |
| SAMN07153395 | 20154797 | CO | 6.101 | 382 | 6 | + | -        | sfb1            | + | - | - | - | - | + | A,C,G,Z   | 8  | parC-S6A | 44  | 123262 | 244770 | 1788174 |
| SAMN07153064 | 20152793 | GA | 6.102 | 382 | 6 | + | -        | sfb1            | + | - | - | - | - | + | A,C,G,K,Z | 8  | parC-S6A | 48  | 156751 | 167801 | 1835064 |
| SAMN07153035 | 20152745 | NM | 6.103 | 382 | 6 | + | -        | sfb1            | + | - | - | - | - | + | A,C,G,K,Z | 8  | parC-S6A | 60  | 89798  | 163225 | 1875120 |
| SAMN07153019 | 20152523 | MN | 6.4   | 382 | 6 | + | -        | sfb1            | + | - | - | - | - | + | A,G,H,I,Z | 8  | parC-S6A | 43  | 134173 | 244705 | 1792214 |
| SAMN07153261 | 20154143 | MN | 6.4   | 382 | 6 | + | -        | sfb1            | + | - | - | - | - | + | A,C,G,Z   | 8  | parC-S6A | 39  | 105471 | 163205 | 1747600 |
| SAMN07153274 | 20154156 | MN | 6.4   | 382 | 6 | + | -        | sfb1            | + | - | - | - | - | + | A,C,G,K,Z | 8  | parC-S6A | 51  | 105395 | 202705 | 1864329 |
| SAMN07153320 | 20154550 | CT | 6.4   | 382 | 6 | + | -        | sfb1            | + | - | - | - | - | + | A,C,G,K,Z | 8  | parC-S6A | 57  | 66182  | 155393 | 1790906 |
| SAMN07153354 | 20154607 | TN | 6.4   | 382 | 6 | + | -        | sfb1            | + | - | - | - | - | + | A,C,G,K,Z | 8  | parC-S6A | 50  | 134031 | 244637 | 1864189 |
| SAMN07153376 | 20154635 | GA | 6.4   | 382 | 6 | + | -        | sfb1            | + | - | - | - | - | + | A,G,Z     | 8  | parC-S6A | 45  | 107720 | 167662 | 1764189 |
| SAMN07153470 | 20155048 | MN | 6.4   | 382 | 6 | + | -        | sfb1            | + | - | - | - | - | + | A,C,G,Z   | 8  | parC-S6A | 33  | 134307 | 244709 | 1745620 |

|              |          |    |      |     |    |   |                 |                               |   |   |   |   |   |   |           |   |                                                    |     |        |        |         |
|--------------|----------|----|------|-----|----|---|-----------------|-------------------------------|---|---|---|---|---|---|-----------|---|----------------------------------------------------|-----|--------|--------|---------|
| SAMN07153476 | 20155055 | MN | 6.4  | 382 | 6  | + | -               | <i>sfb1</i>                   | + | - | - | - | - | + | A,C,G,K,Z | 8 | <i>parC-S6A</i>                                    | 44  | 144389 | 244686 | 1787514 |
| SAMN07153481 | 20155060 | MN | 6.4  | 382 | 6  | + | -               | <i>sfb1</i>                   | + | - | - | - | - | + | A,C,G,Z   | 8 | <i>parC-S6A</i>                                    | 43  | 134215 | 244617 | 1781878 |
| SAMN07153525 | 20155366 | CT | 6.4  | 382 | 6  | + | -               | <i>sfb1</i>                   | + | - | - | - | - | + | A,C,G,K,Z | 8 | <i>parC-S6A</i>                                    | 39  | 107652 | 244730 | 1786864 |
| SAMN07153644 | 20155656 | MD | 6.4  | 382 | 6  | + | -               | <i>sfb1</i>                   | + | - | - | - | - | + | A,C,G,K,Z | 8 | <i>parC-S6A</i>                                    | 44  | 99640  | 197696 | 1789703 |
| SAMN07153704 | 20156183 | MN | 6.4  | 382 | 6  | + | -               | <i>sfb1</i>                   | + | - | - | - | - | + | A,C,G,Z   | 8 | <i>parC-S6A</i>                                    | 32  | 156814 | 244689 | 1744866 |
| SAMN07153832 | 20156707 | CT | 6.4  | 382 | 6  | + | -               | <i>sfb1</i>                   | + | - | - | - | - | + | A,C,G,K,Z | 8 | <i>parC-S6A</i>                                    | 36  | 107653 | 242866 | 1791074 |
| SAMN07153928 | 20160172 | GA | 6.4  | 382 | 6  | + | -               | <i>sfb1</i>                   | + | - | - | - | - | + | A,C,G,K,Z | 8 | <i>parC-S6A</i>                                    | 51  | 67594  | 113103 | 1827621 |
| SAMN07153988 | 20160492 | NM | 6.4  | 382 | 6  | + | -               | <i>sfb1</i>                   | + | - | - | - | - | + | A,C,G,K,Z | 8 | <i>parC-S6A</i>                                    | 42  | 105479 | 244758 | 1829711 |
| SAMN07154176 | 20161537 | GA | 6.4  | 382 | 6  | + | -               | <i>sfb1</i>                   | + | - | - | - | - | + | A,C,G,K,Z | 8 | <i>parC-S6A</i>                                    | 134 | 50555  | 143292 | 1864540 |
| SAMN07154206 | 20161742 | CT | 6.4  | 382 | 6  | + | -               | <i>sfb1</i>                   | + | - | - | - | - | + | A,C,G,K,Z | 8 | <i>parC-S6A</i>                                    | 57  | 51324  | 149800 | 1794045 |
| SAMN07153362 | 20154616 | TN | 6.64 | 382 | 6  | + | -               | <i>sfb1</i>                   | + | - | - | - | - | + | A,C,G,K,Z | 8 | <i>parC-S6A</i>                                    | 83  | 43148  | 194582 | 1872011 |
| SAMN07153656 | 20156019 | GA | 6.8  | 382 | 6  | + | -               | <i>sfb1</i>                   | + | - | - | - | - | + | A,C,G,K,Z | 8 | <i>parC-S6A</i>                                    | 40  | 134276 | 244670 | 1787053 |
| SAMN07153857 | 20156781 | MD | 8    | 59  | 8  | + | <i>enn, mrp</i> | <i>fbaA, sfb1, sof</i>        | + | - | - | - | - | + | G,H,L,M,Z | 1 | <i>ermTTR, tetT</i>                                | 71  | 95900  | 286332 | 1952326 |
| SAMN07154195 | 20161729 | MD | 8    | 59  | 8  | + | <i>enn, mrp</i> | <i>fbaA, sfb1, sof</i>        | + | - | - | - | - | + | G,H,L,M,Z | 1 | <i>ermTTR, tetT</i>                                | 151 | 36943  | 106446 | 1955413 |
| SAMN07153806 | 20156595 | OR | 8    | 869 | -  | + | <i>enn, mrp</i> | <i>fbaA, prtF2, sfb1, sof</i> | + | - | - | - | - | + | G,L,M,Z   | 1 | -                                                  | 28  | 195820 | 280583 | 1784283 |
| SAMN07153532 | 20155373 | CT | 9    | 75  | 9  | + | <i>enn, mrp</i> | <i>fbaA, prtF2, sfb1, sof</i> | + | - | - | - | - | + | G,S,Z     | 1 | <i>ermB, tetM</i>                                  | 43  | 98762  | 205879 | 1956457 |
| SAMN07154097 | 20161091 | CO | 9    | 75  | 9  | + | <i>enn, mrp</i> | <i>fbaA, prtF2, sfb1, sof</i> | + | - | - | - | - | + | G,S,Z     | 1 | <i>ermB, tetM</i>                                  | 36  | 136501 | 284071 | 1945651 |
| SAMN07154205 | 20161741 | CT | 9    | 75  | 9  | + | <i>enn, mrp</i> | <i>fbaA, prtF2, sfb1, sof</i> | + | - | - | - | - | + | G,S,Z     | 1 | <i>ermB, tetM</i>                                  | 117 | 38005  | 138859 | 1959191 |
| SAMN07154362 | 20162662 | CO | 9    | 75  | 9  | + | <i>enn, mrp</i> | <i>fbaA, prtF2, sfb1, sof</i> | + | - | - | - | - | + | G,S,Z     | 1 | <i>ermB, tetM</i>                                  | 32  | 162616 | 284017 | 1935711 |
| SAMN07154383 | 20163036 | TN | 9    | 75  | 9  | + | <i>enn, mrp</i> | <i>fbaA, prtF2, sfb1, sof</i> | + | - | - | - | - | + | G,S,Z     | 1 | -                                                  | 38  | 121495 | 284093 | 1929796 |
| SAMN07153837 | 20156713 | CT | 9.2  | 75  | 9  | + | <i>enn, mrp</i> | <i>fbaA, prtF2, sfb1, sof</i> | + | - | - | - | - | + | C,G,L,M,Z | 1 | -                                                  | 74  | 48988  | 149883 | 1941528 |
| SAMN07153503 | 20155204 | GA | 9.2  | 891 | 9  | + | <i>enn, mrp</i> | <i>fbaA, prtF2, sfb1, sof</i> | + | - | - | - | - | + | G,Z       | 1 | -                                                  | 55  | 79652  | 144752 | 1796984 |
| SAMN07153592 | 20155603 | MD | 9.2  | 891 | 9  | + | <i>enn, mrp</i> | <i>fbaA, prtF2, sfb1, sof</i> | + | - | - | - | - | + | G,Z       | 1 | -                                                  | 25  | 201794 | 283609 | 1790088 |
| SAMN07154046 | 20160970 | NY | 9.2  | 891 | 9  | + | <i>enn, mrp</i> | <i>fbaA, prtF2, sfb1, sof</i> | + | - | - | - | - | + | G,L,M,Z   | 1 | -                                                  | 31  | 156064 | 213383 | 1870505 |
| SAMN07154299 | 20162407 | MN | 9.2  | 891 | 9  | + | <i>enn, mrp</i> | <i>fbaA, prtF2, sfb1, sof</i> | + | - | - | - | - | + | G,L,M,Z   | 1 | -                                                  | 35  | 162868 | 263966 | 1877462 |
| SAMN07154044 | 20160958 | OR | 11   | 403 | 11 | + | <i>enn, mrp</i> | <i>fbaA, prtF2, sfb1, sof</i> | + | - | - | - | - | + | C,G,Z     | 1 | <i>gyrA-S11F, parC-S6Y</i>                         | 38  | 168572 | 503775 | 1788944 |
| SAMN07153029 | 20152737 | NM | 11   | 403 | 11 | + | <i>enn, mrp</i> | <i>fbaA, prtF2, sfb1, sof</i> | + | - | - | - | - | + | C,G,H,I,Z | 1 | <i>ermB, tetM, aph3-III, sat4A</i>                 | 28  | 183307 | 364499 | 1868840 |
| SAMN07153083 | 20152991 | CT | 11   | 403 | 11 | + | <i>enn, mrp</i> | <i>fbaA, prtF2, sfb1, sof</i> | + | - | - | - | - | + | C,G,H,I,Z | 1 | <i>ermB, tetM, parC-S6F</i>                        | 32  | 110306 | 243821 | 1862313 |
| SAMN07153157 | 20153572 | NM | 11   | 403 | 11 | + | <i>enn, mrp</i> | <i>fbaA, prtF2, sfb1, sof</i> | + | - | - | - | - | + | C,G,H,I,Z | 1 | <i>ermB, tetM, aph3-III, sat4A</i>                 | 27  | 243698 | 477271 | 1860533 |
| SAMN07153194 | 20153862 | GA | 11   | 403 | 11 | + | <i>enn, mrp</i> | <i>fbaA, prtF2, sfb1, sof</i> | + | - | - | - | - | + | C,G,S,Z   | 1 | -                                                  | 36  | 243746 | 476274 | 1847362 |
| SAMN07153216 | 20154025 | CA | 11   | 403 | 11 | + | <i>enn, mrp</i> | <i>fbaA, prtF2, sfb1, sof</i> | + | - | - | - | - | + | C,G,H,I,Z | 1 | <i>ermB, tetM</i>                                  | 29  | 133992 | 478574 | 1903912 |
| SAMN07153276 | 20154158 | MN | 11   | 403 | 11 | + | <i>enn, mrp</i> | <i>fbaA, prtF2, sfb1, sof</i> | + | - | - | - | - | + | C,G,H,I,Z | 1 | <i>ermB, tetM, aph3-III, sat4A</i>                 | 28  | 250094 | 477314 | 1880521 |
| SAMN07153301 | 20154375 | NY | 11   | 403 | 11 | + | <i>enn, mrp</i> | <i>fbaA, prtF2, sfb1, sof</i> | + | - | - | - | - | + | C,G,Z     | 1 | <i>parC-D10N</i>                                   | 38  | 137118 | 254493 | 1757900 |
| SAMN07153312 | 20154386 | OR | 11   | 403 | 11 | + | <i>enn, mrp</i> | <i>fbaA, prtF2, sfb1, sof</i> | + | - | - | - | - | + | C,G,Z     | 1 | -                                                  | 43  | 101222 | 214980 | 1761357 |
| SAMN07153315 | 20154545 | CT | 11   | 403 | 11 | + | <i>enn, mrp</i> | <i>fbaA, prtF2, sfb1, sof</i> | + | - | - | - | - | + | C,G,Z     | 1 | -                                                  | 27  | 183201 | 474691 | 1793925 |
| SAMN07153323 | 20154553 | CT | 11   | 403 | 11 | + | <i>mrp</i>      | <i>fbaA, prtF2, sfb1, sof</i> | + | - | - | - | - | + | C,G,H,I,Z | 1 | <i>ermB, tetM</i>                                  | 42  | 157926 | 341671 | 1855798 |
| SAMN07153324 | 20154554 | CT | 11   | 403 | 11 | + | <i>mrp</i>      | <i>fbaA, prtF2, sfb1, sof</i> | + | - | - | - | - | + | C,G,H,I,Z | 1 | <i>ermB, tetM</i>                                  | 30  | 144548 | 478460 | 1858670 |
| SAMN07153339 | 20154592 | TN | 11   | 403 | 11 | + | <i>enn, mrp</i> | <i>fbaA, prtF2, sfb1, sof</i> | + | - | - | - | - | + | C,G,H,I,Z | 1 | <i>ermB, tetM, aph3-III, sat4A</i>                 | 30  | 243919 | 478202 | 1863178 |
| SAMN07153348 | 20154601 | TN | 11   | 403 | 11 | + | <i>enn, mrp</i> | <i>fbaA, prtF2, sfb1, sof</i> | + | - | - | - | - | + | C,G,H,I,Z | 1 | <i>ermB, tetM, aph3-III, sat4A</i>                 | 35  | 144471 | 478551 | 1864885 |
| SAMN07153371 | 20154626 | GA | 11   | 403 | 11 | + | <i>enn, mrp</i> | <i>fbaA, prtF2, sfb1, sof</i> | + | - | - | - | - | + | C,G,H,I,Z | 1 | <i>ermB, ermTR, tetM, ant6-la, aph3-III, sat4A</i> | 55  | 106148 | 257324 | 1937217 |
| SAMN07153523 | 20155364 | CT | 11   | 403 | 11 | + | <i>mrp</i>      | <i>fbaA, prtF2, sfb1, sof</i> | + | - | - | - | - | + | C,G,H,I,Z | 1 | <i>ermB, tetM</i>                                  | 17  | 243770 | 478517 | 1862058 |
| SAMN07153530 | 20155371 | CT | 11   | 403 | 11 | + | <i>mrp</i>      | <i>fbaA, prtF2, sfb1, sof</i> | + | - | - | - | - | + | C,G,H,I,Z | 1 | <i>ermB, tetM</i>                                  | 21  | 243770 | 478498 | 1857713 |
| SAMN07153531 | 20155372 | CT | 11   | 403 | 11 | + | <i>mrp</i>      | <i>fbaA, prtF2, sfb1, sof</i> | + | - | - | - | - | + | C,G,H,I,Z | 1 | <i>ermB, tetM</i>                                  | 26  | 216889 | 478506 | 1857836 |
| SAMN07153542 | 20155383 | CT | 11   | 403 | 11 | + | <i>enn, mrp</i> | <i>fbaA, prtF2, sfb1, sof</i> | + | - | - | - | - | + | C,G,H,I,Z | 1 | <i>ermB, ermTR, tetM</i>                           | 25  | 145034 | 478516 | 1874752 |
| SAMN07153543 | 20155384 | CT | 11   | 403 | -  | + | <i>enn, mrp</i> | <i>fbaA, prtF2, sof</i>       | + | - | - | - | - | + | C,G,H,I,Z | 1 | <i>ermB, tetM</i>                                  | 22  | 229120 | 478581 | 1846995 |

|              |          |    |       |     |    |   |                 |                               |   |   |   |   |   |   |           |   |                                           |     |        |        |         |
|--------------|----------|----|-------|-----|----|---|-----------------|-------------------------------|---|---|---|---|---|---|-----------|---|-------------------------------------------|-----|--------|--------|---------|
| SAMN07153587 | 20155597 | MD | 11    | 403 | 11 | + | <i>enn, mrp</i> | <i>fbaA, prtF2, sfb1, sof</i> | + | - | - | - | - | + | C,G,H,I,Z | 1 | <i>ermB, tetM, aph3-III, sat4A</i>        | 56  | 68179  | 221400 | 1901792 |
| SAMN07153636 | 20155648 | MD | 11    | 403 | 11 | + | <i>enn, mrp</i> | <i>fbaA, prtF2, sfb1, sof</i> | + | - | - | - | - | + | C,G,H,I,Z | 1 | <i>ermB, tetM, aph3-III, sat4A</i>        | 39  | 145819 | 309346 | 1897900 |
| SAMN07153661 | 20156100 | NM | 11    | 403 | 11 | + | <i>enn, mrp</i> | <i>fbaA, prtF2, sfb1, sof</i> | + | - | - | - | - | + | C,G,Z     | 1 | -                                         | 27  | 250069 | 704431 | 1753400 |
| SAMN07153811 | 20156623 | TN | 11    | 403 | 11 | + | <i>enn, mrp</i> | <i>fbaA, prtF2, sfb1, sof</i> | + | - | - | - | - | + | C,G,H,I,Z | 1 | <i>ermB, tetM, aph3-III, sat4A</i>        | 76  | 243443 | 531673 | 1859029 |
| SAMN07153831 | 20156706 | CT | 11    | 403 | 11 | + | <i>enn, mrp</i> | <i>fbaA, prtF2, sfb1, sof</i> | + | - | - | - | - | + | C,G,H,I,Z | 1 | <i>ermB, tetM</i>                         | 23  | 243809 | 465369 | 1859062 |
| SAMN07153834 | 20156709 | CT | 11    | 403 | 11 | + | <i>enn, mrp</i> | <i>fbaA, prtF2, sfb1, sof</i> | + | - | - | - | - | + | C,G,Z     | 1 | <i>ermB, lsaC, tetM, aph3-III, sat4A</i>  | 24  | 250065 | 735489 | 1825556 |
| SAMN07153839 | 20156715 | CT | 11    | 403 | 11 | + | <i>enn, mrp</i> | <i>fbaA, prtF2, sfb1, sof</i> | + | - | - | - | - | + | C,G,H,I,Z | 1 | <i>ermB, tetM</i>                         | 48  | 76510  | 166815 | 1863266 |
| SAMN07153851 | 20156728 | CT | 11    | 403 | 11 | + | <i>enn, mrp</i> | <i>fbaA, prtF2, sfb1, sof</i> | + | - | - | - | - | + | C,G,H,I,Z | 1 | <i>ermB, tetM</i>                         | 24  | 243710 | 476479 | 1860247 |
| SAMN07153871 | 20156795 | MD | 11    | 403 | 11 | + | <i>enn, mrp</i> | <i>fbaA, prtF2, sfb1, sof</i> | + | - | - | - | - | + | C,G,H,I,Z | 1 | <i>ermB, tetM</i>                         | 25  | 243795 | 478559 | 1864746 |
| SAMN07153877 | 20160003 | CO | 11    | 403 | 11 | + | <i>enn, mrp</i> | <i>fbaA, prtF2, sfb1, sof</i> | + | - | - | - | - | + | C,G,H,I,Z | 1 | <i>ermB, tetM, aph3-III, sat4A</i>        | 26  | 243669 | 745099 | 1860590 |
| SAMN07153939 | 20160244 | OR | 11    | 403 | 11 | + | <i>enn, mrp</i> | <i>fbaA, prtF2, sfb1, sof</i> | + | - | - | - | - | + | C,G,H,I,Z | 1 | <i>ermB, tetM, aph3-III, sat4A</i>        | 25  | 222303 | 478465 | 1864024 |
| SAMN07154002 | 20160748 | MD | 11    | 403 | 11 | + | <i>enn, mrp</i> | <i>fbaA, prtF2, sfb1, sof</i> | + | - | - | - | - | + | C,G,Z     | 1 | <i>ermTR</i>                              | 23  | 301801 | 704473 | 1791042 |
| SAMN07154013 | 20160759 | MD | 11    | 403 | 11 | + | <i>enn, mrp</i> | <i>fbaA, prtF2, sfb1, sof</i> | + | - | - | - | - | + | C,G,H,I,Z | 1 | <i>ermB, tetM, aph3-III, sat4A</i>        | 32  | 127854 | 512536 | 1896295 |
| SAMN07154022 | 20160933 | TN | 11    | 403 | 11 | + | <i>enn, mrp</i> | <i>fbaA, prtF2, sfb1, sof</i> | - | - | - | - | - | + | C,G,Z     | 1 | <i>parC-S6Y</i>                           | 30  | 226131 | 478549 | 1757139 |
| SAMN07154035 | 20160949 | CT | 11    | 403 | 11 | + | <i>enn, mrp</i> | <i>fbaA, prtF2, sfb1, sof</i> | + | - | - | - | - | + | C,G,H,I,Z | 1 | <i>ermB, ermTR, tetM, aph3-III, sat4A</i> | 36  | 243825 | 478546 | 1915973 |
| SAMN07154047 | 20160971 | NY | 11    | 403 | 11 | + | <i>enn, mrp</i> | <i>fbaA, prtF2, sfb1, sof</i> | + | - | - | - | - | + | C,G,H,I,Z | 1 | <i>ermB, tetM</i>                         | 25  | 239241 | 478554 | 1900298 |
| SAMN07154100 | 20161094 | CO | 11    | 403 | 11 | + | <i>enn, mrp</i> | <i>fbaA, prtF2, sfb1, sof</i> | + | - | - | - | - | + | C,G,H,I,Z | 1 | <i>ermB, tetM</i>                         | 19  | 243794 | 478217 | 1858076 |
| SAMN07154134 | 20161335 | NM | 11    | 403 | 11 | + | <i>enn, mrp</i> | <i>fbaA, prtF2, sfb1, sof</i> | + | - | - | - | - | + | C,G,Z     | 1 | -                                         | 29  | 213535 | 466022 | 1789116 |
| SAMN07154174 | 20161535 | GA | 11    | 403 | 11 | + | <i>enn, mrp</i> | <i>fbaA, prtF2, sfb1, sof</i> | + | - | - | - | - | + | C,G,H,I,Z | 1 | <i>ermB, tetM, aph3-III, sat4A</i>        | 36  | 135647 | 376986 | 1865913 |
| SAMN07154249 | 20162116 | CA | 11    | 403 | 11 | + | <i>enn, mrp</i> | <i>fbaA, prtF2, sfb1, sof</i> | + | - | - | - | - | + | C,G,H,I,Z | 1 | <i>ermB, tetM</i>                         | 33  | 185098 | 410358 | 1919739 |
| SAMN07154365 | 20162665 | CO | 11    | 403 | 11 | + | <i>enn, mrp</i> | <i>fbaA, prtF2, sfb1, sof</i> | + | - | - | - | - | + | C,G,H,I,Z | 1 | <i>ermB, tetM, aph3-III, sat4A</i>        | 36  | 243832 | 464339 | 1853956 |
| SAMN07154375 | 20162675 | CO | 11    | 403 | 11 | + | <i>enn, mrp</i> | <i>fbaA, prtF2, sfb1, sof</i> | + | - | - | - | - | + | C,G,H,I,Z | 1 | <i>ermB, tetM, aph3-III, sat4A</i>        | 29  | 250062 | 478479 | 1861531 |
| SAMN07154415 | 20164923 | CO | 11    | 403 | 11 | + | <i>enn, mrp</i> | <i>fbaA, prtF2, sfb1, sof</i> | + | - | - | - | - | + | C,G,Z     | 1 | -                                         | 25  | 243782 | 448102 | 1762262 |
| SAMN07153195 | 20153863 | GA | 11    | 907 | 11 | + | <i>enn, mrp</i> | <i>fbaA, prtF2, sfb1, sof</i> | + | - | - | - | - | + | G,H,K,Z   | 1 | <i>tetM</i>                               | 37  | 162471 | 262714 | 1808316 |
| SAMN07153563 | 20155415 | NY | 11.1  | 403 | 11 | + | <i>enn, mrp</i> | <i>fbaA, prtF2, sfb1, sof</i> | + | - | - | - | - | + | C,G,Z     | 1 | -                                         | 24  | 243786 | 474778 | 1753266 |
| SAMN07154333 | 20162633 | CO | 11.1  | 403 | 11 | + | <i>mrp</i>      | <i>fbaA, prtF2, sfb1, sof</i> | + | + | - | - | - | + | C,G,Z     | 1 | -                                         | 31  | 226663 | 474288 | 1797774 |
| SAMN07153841 | 20156717 | CT | 11.16 | 403 | 11 | + | <i>enn, mrp</i> | <i>fbaA, prtF2, sfb1, sof</i> | + | - | - | - | - | + | C,G,H,I,Z | 1 | <i>ermB, tetM, aph3-III, sat4A</i>        | 36  | 145841 | 243808 | 1864099 |
| SAMN07154200 | 20161736 | CT | 11.16 | 403 | 11 | + | <i>enn, mrp</i> | <i>fbaA, prtF2, sfb1, sof</i> | + | - | - | - | - | + | C,G,H,I,Z | 1 | <i>ermB, tetM, aph3-III, sat4A</i>        | 149 | 20360  | 60261  | 1885898 |
| SAMN07154148 | 20161432 | MN | 11.17 | 403 | 11 | + | <i>enn, mrp</i> | <i>fbaA, prtF2, sfb1, sof</i> | + | - | - | - | - | + | C,G,H,I,Z | 1 | <i>ermB, tetM</i>                         | 23  | 246493 | 775630 | 1853731 |
| SAMN07153956 | 20160313 | MN | 11.18 | 403 | 11 | + | <i>enn, mrp</i> | <i>fbaA, prtF2, sfb1, sof</i> | + | - | - | - | - | + | C,G,Z     | 1 | -                                         | 30  | 187030 | 473339 | 1754131 |
| SAMN07152976 | 20152178 | GA | 12    | 36  | 12 | + | -               | <i>prtF2, sfb1</i>            | + | + | + | - | + | + | G,H,I,Z   | 1 | -                                         | 45  | 122752 | 343347 | 1766960 |
| SAMN07153888 | 20160015 | CO | 12    | 36  | 12 | + | -               | <i>prtF2, sfb1</i>            | + | + | + | - | + | + | C,G,H,I,Z | 1 | -                                         | 57  | 77188  | 201679 | 1807808 |
| SAMN07154137 | 20161338 | NM | 12    | 36  | 12 | + | -               | <i>prtF2, sfb1</i>            | + | + | + | - | + | + | C,G,H,I,Z | 1 | -                                         | 47  | 90665  | 203890 | 1807274 |
| SAMN07154142 | 20161426 | MN | 12    | 36  | 12 | + | -               | <i>prtF2, sfb1</i>            | + | + | - | - | + | + | C,G,H,I,Z | 1 | -                                         | 52  | 97387  | 201667 | 1843204 |
| SAMN07152979 | 20152182 | GA | 12    | 36  | 12 | + | -               | <i>prtF2, sfb1</i>            | + | + | + | - | + | + | G,H,I,Z   | 1 | -                                         | 38  | 124501 | 344119 | 1773811 |
| SAMN07152980 | 20152183 | GA | 12    | 36  | 12 | + | -               | <i>prtF2, sfb1</i>            | + | + | + | - | + | + | G,H,I,Z   | 1 | -                                         | 38  | 122804 | 476142 | 1773516 |
| SAMN07152983 | 20152227 | NY | 12    | 36  | 12 | + | -               | <i>prtF2, sfb1</i>            | + | + | + | - | + | + | G,H,I,Z   | 1 | -                                         | 71  | 64324  | 160405 | 1834779 |
| SAMN07152992 | 20152236 | NY | 12    | 36  | 12 | + | -               | <i>prtF2, sfb1</i>            | + | + | + | - | + | + | C,G,H,I,Z | 4 | -                                         | 48  | 96209  | 161388 | 1811244 |
| SAMN07153001 | 20152304 | OR | 12    | 36  | 12 | + | -               | <i>prtF2, sfb1</i>            | + | + | - | - | + | + | C,G,H,I,Z | 1 | -                                         | 108 | 29192  | 154466 | 1818920 |
| SAMN07153017 | 20152521 | MN | 12    | 36  | 12 | + | -               | <i>prtF2, sfb1</i>            | + | + | + | - | + | + | C,G,H,I,Z | 1 | -                                         | 39  | 156746 | 226857 | 1813094 |
| SAMN07153023 | 20152610 | GA | 12    | 36  | 12 | + | -               | <i>prtF2, sfb1</i>            | + | + | + | - | + | + | C,G,H,I,Z | 4 | -                                         | 49  | 148443 | 214736 | 1813455 |
| SAMN07153027 | 20152735 | NM | 12    | 36  | 12 | + | -               | <i>prtF2, sfb1</i>            | + | + | + | - | + | + | C,G,H,I,Z | 1 | -                                         | 42  | 148466 | 203914 | 1813810 |
| SAMN07153078 | 20152977 | OR | 12    | 36  | 12 | + | -               | <i>prtF2, sfb1</i>            | + | + | + | - | + | + | C,G,H,I,Z | 1 | -                                         | 45  | 148390 | 226778 | 1812907 |
| SAMN07153086 | 20152994 | CT | 12    | 36  | 12 | + | -               | <i>prtF2, sfb1</i>            | + | + | + | - | + | + | G,H,I,Z   | 1 | -                                         | 46  | 99857  | 193680 | 1805413 |
| SAMN07153087 | 20153040 | GA | 12    | 36  | 12 | + | -               | <i>prtF2, sfb1</i>            | + | + | + | - | + | + | C,G,H,I,Z | 4 | -                                         | 53  | 178219 | 214677 | 1802813 |

|              |          |    |    |    |    |   |   |                    |   |   |   |   |   |   |           |   |                  |    |        |        |         |
|--------------|----------|----|----|----|----|---|---|--------------------|---|---|---|---|---|---|-----------|---|------------------|----|--------|--------|---------|
| SAMN07153096 | 20153049 | GA | 12 | 36 | 12 | + | - | <i>prtF2, sfb1</i> | + | + | + | - | + | + | G,H,I,Z   | 1 | <i>ermTR</i>     | 36 | 148134 | 475978 | 1810899 |
| SAMN07153111 | 20153105 | NY | 12 | 36 | 12 | + | - | <i>prtF2, sfb1</i> | + | + | + | - | + | + | G,H,I,Z   | 1 | -                | 45 | 122616 | 396775 | 1767585 |
| SAMN07153112 | 20153106 | NY | 12 | 36 | 12 | + | - | <i>prtF2, sfb1</i> | + | + | - | - | + | + | G,H,I,Z   | 1 | -                | 43 | 90530  | 343439 | 1826025 |
| SAMN07153138 | 20153534 | OR | 12 | 36 | 12 | + | - | <i>prtF2, sfb1</i> | + | + | + | - | + | + | G,H,I,Z   | 1 | <i>ermTR</i>     | 33 | 148612 | 476065 | 1811840 |
| SAMN07153140 | 20153536 | OR | 12 | 36 | 12 | + | - | <i>prtF2, sfb1</i> | + | + | - | - | + | + | C,G,H,I,Z | 1 | -                | 37 | 100164 | 203935 | 1812987 |
| SAMN07153142 | 20153538 | OR | 12 | 36 | 12 | + | - | <i>prtF2, sfb1</i> | + | + | + | - | + | + | C,G,H,I,Z | 1 | -                | 43 | 182112 | 201654 | 1806126 |
| SAMN07153151 | 20153557 | GA | 12 | 36 | 12 | + | - | <i>prtF2, sfb1</i> | + | - | + | - | + | + | G,H,I,Z   | 1 | -                | 53 | 162906 | 343505 | 1758733 |
| SAMN07153166 | 20153581 | NM | 12 | 36 | 12 | + | - | <i>prtF2, sfb1</i> | + | + | + | - | + | + | C,G,H,I,Z | 4 | -                | 80 | 53150  | 171986 | 1805420 |
| SAMN07153170 | 20153598 | CO | 12 | 36 | 12 | + | - | <i>prtF2, sfb1</i> | + | + | + | - | + | + | C,G,H,I,Z | 1 | -                | 42 | 148434 | 226829 | 1807614 |
| SAMN07153173 | 20153602 | CO | 12 | 36 | 12 | + | - | <i>prtF2, sfb1</i> | + | + | + | - | + | + | C,G,H,I,Z | 1 | -                | 42 | 182140 | 226827 | 1806729 |
| SAMN07153177 | 20153606 | CO | 12 | 36 | 12 | + | - | <i>prtF2, sfb1</i> | + | + | + | - | + | + | C,G,H,I,Z | 1 | -                | 43 | 182064 | 226731 | 1804798 |
| SAMN07153178 | 20153607 | CO | 12 | 36 | 12 | + | - | <i>prtF2, sfb1</i> | + | + | + | - | + | + | G,H,I,Z   | 1 | -                | 43 | 97923  | 315058 | 1767092 |
| SAMN07153180 | 20153609 | CO | 12 | 36 | 12 | + | - | <i>prtF2, sfb1</i> | + | + | + | - | + | + | C,G,H,I,Z | 1 | -                | 42 | 182108 | 226748 | 1805914 |
| SAMN07153188 | 20153617 | CO | 12 | 36 | 12 | + | - | <i>prtF2, sfb1</i> | + | + | + | - | + | + | C,G,H,I,Z | 1 | -                | 48 | 182009 | 214813 | 1803867 |
| SAMN07153190 | 20153619 | CO | 12 | 36 | 12 | + | - | <i>prtF2, sfb1</i> | + | - | + | - | + | + | G,H,I,Z   | 1 | -                | 50 | 140783 | 212329 | 1763003 |
| SAMN07153221 | 20154031 | CA | 12 | 36 | 12 | + | - | <i>prtF2, sfb1</i> | + | + | + | - | + | + | C,G,H,I,Z | 1 | -                | 42 | 148398 | 226860 | 1805751 |
| SAMN07153225 | 20154035 | CA | 12 | 36 | 12 | + | - | <i>prtF2, sfb1</i> | + | + | + | - | + | + | C,G,H,I,Z | 1 | -                | 51 | 137467 | 226691 | 1809296 |
| SAMN07153239 | 20154049 | CA | 12 | 36 | 12 | + | - | <i>prtF2, sfb1</i> | + | + | + | - | + | + | C,G,H,I,Z | 1 | -                | 41 | 181350 | 226823 | 1805871 |
| SAMN07153248 | 20154129 | MN | 12 | 36 | 12 | + | - | <i>prtF2, sfb1</i> | + | + | + | - | + | + | C,G,H,I,Z | 1 | <i>ermTR</i>     | 42 | 131516 | 224317 | 1851399 |
| SAMN07153249 | 20154130 | MN | 12 | 36 | 12 | + | - | <i>prtF2, sfb1</i> | + | + | + | - | + | + | C,G,H,I,Z | 4 | -                | 38 | 148374 | 203956 | 1806101 |
| SAMN07153251 | 20154132 | MN | 12 | 36 | 12 | + | - | <i>prtF2, sfb1</i> | + | + | + | - | + | + | G,H,I,Z   | 1 | -                | 37 | 164150 | 343325 | 1767622 |
| SAMN07153258 | 20154140 | MN | 12 | 36 | 12 | + | - | <i>prtF2, sfb1</i> | + | + | + | - | + | + | G,H,I,Z   | 1 | <i>ermTR</i>     | 39 | 148652 | 326064 | 1815539 |
| SAMN07153295 | 20154296 | NM | 12 | 36 | 12 | + | - | <i>prtF2, sfb1</i> | + | + | + | - | + | + | C,G,H,I,Z | 1 | -                | 49 | 101678 | 201654 | 1807958 |
| SAMN07153313 | 20154543 | CT | 12 | 36 | 12 | + | - | <i>prtF2, sfb1</i> | + | + | - | - | + | + | G,H,I,Z   | 1 | <i>mef, msrD</i> | 50 | 178612 | 343163 | 1813245 |
| SAMN07153322 | 20154552 | CT | 12 | 36 | 12 | + | - | <i>prtF2, sfb1</i> | + | + | + | - | + | + | G,H,I,Z   | 1 | -                | 49 | 148553 | 305137 | 1767777 |
| SAMN07153379 | 20154677 | NM | 12 | 36 | 12 | + | - | <i>prtF2, sfb1</i> | + | + | + | - | + | + | C,G,H,I,Z | 1 | -                | 50 | 132901 | 203776 | 1805794 |
| SAMN07153382 | 20154681 | NM | 12 | 36 | 12 | + | - | <i>prtF2, sfb1</i> | + | + | + | - | + | + | C,G,H,I,Z | 1 | -                | 46 | 177126 | 226770 | 1804251 |
| SAMN07153388 | 20154790 | CO | 12 | 36 | 12 | + | - | <i>prtF2, sfb1</i> | + | + | + | - | + | + | C,G,H,I,Z | 1 | -                | 49 | 148378 | 280310 | 1809603 |
| SAMN07153391 | 20154793 | CO | 12 | 36 | 12 | + | - | <i>prtF2, sfb1</i> | + | + | + | - | + | + | C,G,H,I,Z | 1 | -                | 38 | 182148 | 226529 | 1807493 |
| SAMN07153396 | 20154798 | CO | 12 | 36 | 12 | + | - | <i>prtF2, sfb1</i> | + | + | + | - | + | + | C,G,H,I,Z | 1 | -                | 42 | 182079 | 226844 | 1806258 |
| SAMN07153398 | 20154800 | CO | 12 | 36 | 12 | + | - | <i>prtF2, sfb1</i> | + | - | + | - | + | + | G,H,I,Z   | 1 | -                | 48 | 82527  | 198869 | 1763382 |
| SAMN07153406 | 20154809 | CO | 12 | 36 | 12 | + | - | <i>prtF2, sfb1</i> | + | - | + | - | + | + | G,H,I,Z   | 1 | -                | 47 | 148443 | 323793 | 1762010 |
| SAMN07153408 | 20154811 | CO | 12 | 36 | 12 | + | - | <i>prtF2, sfb1</i> | - | + | + | - | + | + | G,H,I,Z   | 1 | -                | 45 | 148604 | 396867 | 1792588 |
| SAMN07153434 | 20154966 | NY | 12 | 36 | 12 | + | - | <i>prtF2, sfb1</i> | + | + | - | - | + | + | G,H,I,Z   | 1 | -                | 32 | 148411 | 478825 | 1767823 |
| SAMN07153438 | 20154970 | NY | 12 | 36 | 12 | + | - | <i>prtF2, sfb1</i> | + | + | + | - | + | + | C,G,H,I,Z | 1 | -                | 41 | 182655 | 226588 | 1812342 |
| SAMN07153451 | 20155029 | MN | 12 | 36 | 12 | + | - | <i>prtF2, sfb1</i> | + | + | + | - | + | + | G,H,I,Z   | 1 | <i>ermTR</i>     | 35 | 148430 | 262512 | 1815042 |
| SAMN07153458 | 20155036 | MN | 12 | 36 | 12 | + | - | <i>prtF2, sfb1</i> | + | + | + | - | + | + | C,G,H,I,Z | 1 | -                | 40 | 125999 | 250626 | 1809368 |
| SAMN07153477 | 20155056 | MN | 12 | 36 | 12 | + | - | <i>prtF2, sfb1</i> | + | + | + | - | + | + | C,G,H,I,Z | 4 | -                | 46 | 108215 | 203706 | 1807572 |
| SAMN07153480 | 20155059 | MN | 12 | 36 | 12 | + | - | <i>prtF2, sfb1</i> | + | + | + | - | + | + | C,G,H,I,Z | 1 | <i>ermTR</i>     | 46 | 96114  | 224365 | 1853246 |
| SAMN07153495 | 20155195 | GA | 12 | 36 | 12 | + | - | <i>prtF2, sfb1</i> | + | + | + | - | + | + | C,G,H,I,Z | 1 | -                | 52 | 73250  | 201648 | 1807914 |
| SAMN07153557 | 20155409 | NY | 12 | 36 | 12 | + | - | <i>prtF2, sfb1</i> | + | + | + | - | + | + | G,H,I,Z   | 1 | -                | 35 | 105788 | 212057 | 1772261 |
| SAMN07153558 | 20155410 | NY | 12 | 36 | 12 | + | - | <i>prtF2, sfb1</i> | + | + | + | - | + | + | G,H,I,Z   | 1 | -                | 42 | 96147  | 396933 | 1769484 |
| SAMN07153582 | 20155590 | TN | 12 | 36 | 12 | + | - | <i>prtF2, sfb1</i> | + | + | + | - | + | + | G,H,I,Z   | 1 | -                | 42 | 99918  | 396884 | 1767581 |
| SAMN07153590 | 20155601 | MD | 12 | 36 | 12 | + | - | <i>prtF2, sfb1</i> | + | - | + | - | + | + | G,H,I,Z   | 1 | -                | 40 | 163014 | 406190 | 1775380 |
| SAMN07153600 | 20155611 | MD | 12 | 36 | 12 | + | - | <i>prtF2, sfb1</i> | + | + | + | - | + | + | G,H,I,Z   | 1 | -                | 50 | 187441 | 406244 | 1817683 |

|              |          |    |    |    |    |   |   |                    |   |   |   |   |   |   |           |    |                  |    |        |        |         |
|--------------|----------|----|----|----|----|---|---|--------------------|---|---|---|---|---|---|-----------|----|------------------|----|--------|--------|---------|
| SAMN07153607 | 20155619 | MD | 12 | 36 | 12 | + | - | <i>prtF2, sfb1</i> | + | + | + | - | + | + | G,H,I,Z   | 1  | -                | 40 | 183590 | 396822 | 1766616 |
| SAMN07153626 | 20155638 | MD | 12 | 36 | 12 | + | - | <i>prtF2, sfb1</i> | + | + | + | - | + | + | C,G,H,I,Z | 1  | -                | 53 | 182510 | 229585 | 1803583 |
| SAMN07153658 | 20156022 | GA | 12 | 36 | 12 | + | - | <i>prtF2, sfb1</i> | + | + | + | - | + | + | C,G,H,I,Z | 1  | -                | 37 | 156062 | 383925 | 1811541 |
| SAMN07153682 | 20156161 | MN | 12 | 36 | 12 | + | - | <i>prtF2, sfb1</i> | + | + | + | - | + | + | C,G,H,I,Z | 13 | -                | 58 | 148096 | 203748 | 1806490 |
| SAMN07153696 | 20156175 | MN | 12 | 36 | 12 | + | - | <i>prtF2, sfb1</i> | + | + | + | - | + | + | G,H,I,Z   | 1  | -                | 41 | 148475 | 420893 | 1772141 |
| SAMN07153699 | 20156178 | MN | 12 | 36 | 12 | + | - | <i>prtF2, sfb1</i> | + | + | + | - | + | + | C,G,H,I,Z | 1  | -                | 37 | 182106 | 226626 | 1804591 |
| SAMN07153714 | 20156265 | OR | 12 | 36 | 12 | + | - | <i>prtF2, sfb1</i> | + | + | + | - | + | + | C,G,H,I,Z | 1  | -                | 38 | 140941 | 226810 | 1808396 |
| SAMN07153725 | 20156323 | GA | 12 | 36 | 12 | + | - | <i>prtF2, sfb1</i> | + | + | + | - | + | + | G,H,I,Z   | 1  | -                | 40 | 85698  | 396929 | 1768445 |
| SAMN07153738 | 20156391 | CA | 12 | 36 | 12 | + | - | <i>prtF2, sfb1</i> | + | + | + | - | + | + | C,G,H,I,Z | 1  | -                | 49 | 178773 | 217308 | 1800011 |
| SAMN07153745 | 20156398 | CA | 12 | 36 | 12 | + | - | <i>prtF2, sfb1</i> | + | + | + | - | + | + | C,G,H,I,Z | 1  | -                | 42 | 162396 | 226872 | 1805033 |
| SAMN07153772 | 20156428 | CA | 12 | 36 | 12 | + | - | <i>prtF2, sfb1</i> | + | + | + | - | + | + | C,G,H,I,Z | 1  | -                | 53 | 112752 | 212038 | 1808385 |
| SAMN07153779 | 20156435 | CA | 12 | 36 | 12 | + | - | <i>prtF2, sfb1</i> | + | + | + | - | + | + | C,G,H,I,Z | 1  | -                | 51 | 149345 | 214862 | 1806529 |
| SAMN07153802 | 20156458 | CA | 12 | 36 | 12 | + | - | <i>prtF2, sfb1</i> | + | + | + | - | + | + | C,G,H,I,Z | 1  | -                | 45 | 178868 | 214867 | 1806372 |
| SAMN07153815 | 20156628 | TN | 12 | 36 | 12 | + | - | <i>prtF2, sfb1</i> | + | + | + | - | + | + | C,G,H,I,Z | 4  | -                | 41 | 182080 | 226838 | 1806198 |
| SAMN07153827 | 20156640 | NY | 12 | 36 | 12 | + | - | <i>prtF2, sfb1</i> | + | + | + | - | + | + | G,H,I,Z   | 1  | -                | 37 | 116513 | 396791 | 1770853 |
| SAMN07153830 | 20156705 | CT | 12 | 36 | 12 | + | - | <i>prtF2, sfb1</i> | + | + | - | - | + | + | G,H,I,Z   | 1  | <i>mef, msrD</i> | 35 | 183504 | 475982 | 1817401 |
| SAMN07153847 | 20156724 | CT | 12 | 36 | 12 | + | - | <i>prtF2, sfb1</i> | + | - | + | - | + | + | G,H,I,Z   | 1  | -                | 59 | 163002 | 343601 | 1775275 |
| SAMN07153852 | 20156729 | CT | 12 | 36 | 12 | + | - | <i>prtF2, sfb1</i> | + | + | + | - | + | + | C,G,H,I,Z | 1  | -                | 43 | 181627 | 222982 | 1805193 |
| SAMN07153876 | 20160002 | CO | 12 | 36 | 12 | + | - | <i>prtF2, sfb1</i> | + | - | + | - | + | + | G,H,I,Z   | 1  | -                | 53 | 132316 | 267999 | 1764547 |
| SAMN07153894 | 20160021 | CO | 12 | 36 | 12 | + | - | <i>prtF2, sfb1</i> | + | + | + | - | + | + | C,G,H,I,Z | 1  | -                | 48 | 182072 | 394140 | 1812310 |
| SAMN07153912 | 20160041 | CO | 12 | 36 | 12 | + | - | <i>prtF2, sfb1</i> | + | - | + | - | + | + | C,G,H,I,Z | 1  | -                | 37 | 163070 | 226842 | 1769929 |
| SAMN07153914 | 20160043 | CO | 12 | 36 | 12 | + | - | <i>prtF2, sfb1</i> | + | + | + | - | + | + | C,G,H,I,Z | 1  | <i>parC-S6F</i>  | 43 | 109279 | 221023 | 1808454 |
| SAMN07153915 | 20160134 | NM | 12 | 36 | 12 | + | - | <i>prtF2, sfb1</i> | + | + | + | - | + | + | C,G,H,I,Z | 1  | -                | 44 | 182048 | 226793 | 1805032 |
| SAMN07153923 | 20160142 | NM | 12 | 36 | 12 | + | - | <i>prtF2, sfb1</i> | + | + | + | - | + | + | C,G,H,I,Z | 1  | -                | 38 | 149427 | 226837 | 1806691 |
| SAMN07153926 | 20160145 | NM | 12 | 36 | 12 | + | - | <i>prtF2, sfb1</i> | + | + | - | - | + | + | C,G,H,I,Z | 1  | -                | 45 | 86051  | 212786 | 1806099 |
| SAMN07153957 | 20160314 | MN | 12 | 36 | 12 | + | - | <i>prtF2, sfb1</i> | + | - | + | - | + | + | G,H,I,Z   | 1  | -                | 44 | 148597 | 406232 | 1780651 |
| SAMN07153971 | 20160328 | MN | 12 | 36 | 12 | + | - | <i>prtF2, sfb1</i> | + | + | + | - | + | + | G,H,I,Z   | 1  | <i>ermTR</i>     | 33 | 122665 | 359805 | 1813371 |
| SAMN07153998 | 20160502 | NM | 12 | 36 | 12 | + | - | <i>prtF2, sfb1</i> | + | + | + | - | + | + | C,G,H,I,Z | 1  | -                | 39 | 182080 | 226739 | 1806384 |
| SAMN07154000 | 20160746 | MD | 12 | 36 | 12 | + | - | <i>prtF2, sfb1</i> | + | + | + | - | + | + | G,H,I,Z   | 1  | -                | 43 | 122709 | 343396 | 1813186 |
| SAMN07154020 | 20160930 | TN | 12 | 36 | 12 | + | - | <i>prtF2, sfb1</i> | + | + | + | - | + | + | C,G,H,I,Z | 1  | -                | 37 | 153838 | 204028 | 1811271 |
| SAMN07154029 | 20160943 | CT | 12 | 36 | 12 | + | - | <i>prtF2, sfb1</i> | + | + | - | - | + | + | G,H,I,Z   | 1  | <i>mef, msrD</i> | 41 | 132104 | 343675 | 1818978 |
| SAMN07154053 | 20160977 | NY | 12 | 36 | 12 | + | - | <i>prtF2, sfb1</i> | + | + | + | - | + | + | C,G,H,I,Z | 4  | -                | 36 | 182132 | 226790 | 1806258 |
| SAMN07154070 | 20161028 | NM | 12 | 36 | 12 | + | - | <i>prtF2, sfb1</i> | + | + | + | - | + | + | C,G,H,I,Z | 1  | -                | 37 | 148462 | 203911 | 1807617 |
| SAMN07154074 | 20161068 | CO | 12 | 36 | 12 | + | - | <i>prtF2, sfb1</i> | + | + | + | - | + | + | C,G,H,I,Z | 1  | -                | 47 | 182004 | 226728 | 1804595 |
| SAMN07154078 | 20161072 | CO | 12 | 36 | 12 | + | - | <i>prtF2, sfb1</i> | + | - | + | - | + | + | G,H,I,Z   | 1  | -                | 46 | 163108 | 234909 | 1763127 |
| SAMN07154118 | 20161233 | NY | 12 | 36 | 12 | + | - | <i>prtF2, sfb1</i> | + | + | + | - | + | + | G,H,I,Z   | 1  | -                | 35 | 148347 | 475626 | 1766829 |
| SAMN07154126 | 20161241 | NY | 12 | 36 | 12 | + | - | <i>prtF2, sfb1</i> | + | + | + | - | + | + | C,G,H,I,Z | 4  | -                | 41 | 182345 | 226778 | 1805248 |
| SAMN07154133 | 20161334 | NM | 12 | 36 | 12 | + | - | <i>prtF2, sfb1</i> | + | + | - | - | + | + | C,G,H,I,Z | 1  | -                | 40 | 182012 | 226793 | 1805009 |
| SAMN07154165 | 20161449 | MN | 12 | 36 | 12 | + | - | <i>prtF2, sfb1</i> | + | + | + | - | + | + | C,G,H,I,Z | 4  | -                | 52 | 148239 | 203686 | 1803855 |
| SAMN07154211 | 20161831 | OR | 12 | 36 | 12 | + | - | <i>prtF2, sfb1</i> | + | + | + | - | + | + | C,G,H,I,Z | 1  | -                | 78 | 76463  | 161177 | 1810005 |
| SAMN07154219 | 20161839 | OR | 12 | 36 | 12 | + | - | <i>prtF2, sfb1</i> | + | - | - | - | + | + | C,G,H,I,Z | 1  | -                | 38 | 163050 | 226815 | 1764849 |
| SAMN07154270 | 20162137 | CA | 12 | 36 | 12 | + | - | <i>prtF2, sfb1</i> | + | + | - | - | + | + | C,G,H,I,Z | 1  | -                | 46 | 182064 | 226878 | 1811548 |
| SAMN07154283 | 20162151 | CA | 12 | 36 | 12 | + | - | <i>prtF2, sfb1</i> | + | + | + | - | + | + | C,G,H,I,Z | 1  | -                | 42 | 181254 | 229709 | 1809166 |
| SAMN07154317 | 20162425 | MN | 12 | 36 | 12 | + | - | <i>prtF2, sfb1</i> | + | + | - | - | + | + | G,H,I,Z   | 1  | -                | 91 | 131758 | 343573 | 1785502 |
| SAMN07154358 | 20162658 | CO | 12 | 36 | 12 | + | - | <i>prtF2, sfb1</i> | + | + | + | - | + | + | G,H,I,Z   | 1  | -                | 37 | 122669 | 343619 | 1776601 |

|              |          |    |       |     |    |   |   |                                             |                    |   |   |   |   |   |   |             |   |                   |     |        |        |         |
|--------------|----------|----|-------|-----|----|---|---|---------------------------------------------|--------------------|---|---|---|---|---|---|-------------|---|-------------------|-----|--------|--------|---------|
| SAMN07154399 | 20164210 | NM | 12    | 36  | 12 | + | - |                                             | <i>prtF2, sfb1</i> | + | + | + | - | + | + | G,H,I,Z     | 1 | -                 | 178 | 132197 | 343452 | 1796419 |
| SAMN07154413 | 20164921 | CO | 12    | 36  | 12 | + | - |                                             | <i>prtF2, sfb1</i> | + | + | + | - | + | + | G,H,I,Z     | 1 | -                 | 42  | 122641 | 343335 | 1770926 |
| SAMN07154420 | 20164928 | CO | 12    | 36  | 12 | + | - |                                             | <i>prtF2, sfb1</i> | + | - | + | - | + | + | G,H,I,Z     | 1 | -                 | 55  | 162994 | 343607 | 1765957 |
| SAMN07154423 | 20165278 | CA | 12    | 36  | 12 | + | - |                                             | <i>prtF2, sfb1</i> | + | + | + | - | + | + | C,G,H,I,S,Z | 1 | <i>ermB, tetM</i> | 57  | 99736  | 343497 | 1870512 |
| SAMN07154426 | 20165975 | TN | 12    | 36  | 12 | + | - |                                             | <i>prtF2, sfb1</i> | + | + | - | - | + | + | C,G,H,I,Z   | 4 | -                 | 40  | 148387 | 226726 | 1810219 |
| SAMN07152990 | 20152234 | NY | 12    | 846 | 12 | + | - |                                             | <i>prtF2, sfb1</i> | + | + | - | - | + | + | G,H,I,Z     | 1 | <i>mef, msrD</i>  | 59  | 70630  | 171443 | 1827841 |
| SAMN07152989 | 20152233 | NY | 12    | 846 | 12 | + | - |                                             | <i>prtF2, sfb1</i> | + | + | - | + | + | + | G,H,I,Z     | 1 | <i>mef, msrD</i>  | 46  | 82144  | 218398 | 1823886 |
| SAMN07153008 | 20152509 | MN | 12    | 908 | 12 | + | - |                                             | <i>prtF2, sfb1</i> | + | + | - | - | + | + | G,H,I,Z     | 1 | -                 | 81  | 53611  | 125813 | 1775103 |
| SAMN07153791 | 20156447 | CA | 12.32 | 36  | 12 | + | - |                                             | <i>prtF2, sfb1</i> | + | + | + | - | + | + | G,H,I,Z     | 1 | -                 | 42  | 86620  | 235630 | 1766292 |
| SAMN07153266 | 20154148 | MN | 12.7  | 36  | 12 | + | - |                                             | <i>prtF2, sfb1</i> | + | + | + | - | + | + | C,G,H,I,Z   | 1 | -                 | 48  | 127481 | 384121 | 1807198 |
| SAMN07153489 | 20155068 | MN | 12.7  | 36  | 12 | + | - |                                             | <i>prtF2, sfb1</i> | + | + | + | - | + | + | C,G,H,I,Z   | 1 | -                 | 46  | 77381  | 330990 | 1806515 |
| SAMN07153012 | 20152516 | MN | 12.7  | 36  | 12 | + | - |                                             | <i>prtF2, sfb1</i> | + | + | + | - | + | + | C,G,H,I,Z   | 1 | -                 | 129 | 27305  | 97152  | 1823759 |
| SAMN07153256 | 20154137 | MN | 12.7  | 36  | 12 | + | - |                                             | <i>prtF2, sfb1</i> | + | + | + | - | + | + | C,G,H,I,Z   | 1 | -                 | 37  | 148454 | 213923 | 1806877 |
| SAMN07153286 | 20154168 | MN | 12.7  | 36  | 12 | + | - |                                             | <i>prtF2, sfb1</i> | + | + | + | - | + | + | C,G,H,I,Z   | 1 | -                 | 34  | 183658 | 384055 | 1810535 |
| SAMN07153422 | 20154946 | OR | 12.7  | 36  | 12 | + | - |                                             | <i>prtF2, sfb1</i> | + | + | + | - | + | + | C,G,H,I,Z   | 1 | -                 | 41  | 183615 | 384083 | 1806300 |
| SAMN07153487 | 20155066 | MN | 12.7  | 36  | 12 | + | - |                                             | <i>prtF2, sfb1</i> | + | + | + | - | + | + | G,Z         | 1 | -                 | 34  | 183666 | 342318 | 1724448 |
| SAMN07153688 | 20156167 | MN | 12.7  | 36  | 12 | + | - |                                             | <i>prtF2, sfb1</i> | + | + | + | - | + | + | C,G,H,I,Z   | 1 | -                 | 39  | 183664 | 363930 | 1806293 |
| SAMN07153695 | 20156174 | MN | 12.7  | 36  | 12 | + | - |                                             | <i>prtF2, sfb1</i> | + | + | + | - | + | + | C,G,H,I,Z   | 1 | -                 | 38  | 131352 | 252995 | 1807441 |
| SAMN07153698 | 20156177 | MN | 12.7  | 36  | 12 | + | - |                                             | <i>prtF2, sfb1</i> | + | + | + | - | + | + | C,G,H,I,Z   | 1 | -                 | 37  | 148442 | 384123 | 1805969 |
| SAMN07153707 | 20156186 | MN | 12.7  | 36  | 12 | + | - |                                             | <i>prtF2, sfb1</i> | + | + | - | - | + | + | C,G,H,I,Z   | 1 | -                 | 38  | 183640 | 384091 | 1805997 |
| SAMN07153932 | 20160176 | GA | 12.7  | 36  | 12 | + | - |                                             | <i>prtF2, sfb1</i> | + | + | - | - | + | + | C,G,H,I,Z   | 4 | -                 | 44  | 99726  | 203922 | 1808258 |
| SAMN07153960 | 20160317 | MN | 12.7  | 36  | 12 | + | - |                                             | <i>prtF2, sfb1</i> | + | + | + | - | + | + | C,G,H,I,Z   | 1 | -                 | 40  | 148446 | 384127 | 1808475 |
| SAMN07153968 | 20160325 | MN | 12.7  | 36  | 12 | + | - |                                             | <i>prtF2, sfb1</i> | + | + | + | - | + | + | C,G,H,I,Z   | 1 | -                 | 38  | 178333 | 384129 | 1807580 |
| SAMN07154300 | 20162408 | MN | 12.7  | 36  | 12 | + | - |                                             | <i>prtF2, sfb1</i> | + | + | + | - | + | + | G,Z         | 1 | -                 | 40  | 183276 | 342266 | 1732460 |
| SAMN07153109 | 20153103 | NY | 12.75 | 36  | 12 | + | - |                                             | <i>prtF2, sfb1</i> | + | + | + | - | + | + | C,G,H,I,S,Z | 1 | <i>ermB, tetM</i> | 58  | 101425 | 226770 | 1916604 |
| SAMN07153755 | 20156410 | CA | 12.75 | 36  | 12 | + | - |                                             | <i>prtF2, sfb1</i> | + | + | + | - | + | + | G,H,I,S,Z   | 1 | -                 | 39  | 113583 | 362053 | 1806130 |
| SAMN07154057 | 20160981 | NY | 12.75 | 36  | 12 | + | - |                                             | <i>prtF2, sfb1</i> | + | + | + | - | + | + | C,G,H,I,S,Z | 1 | <i>ermB, tetM</i> | 52  | 101533 | 226818 | 1918923 |
| SAMN07154031 | 20160945 | CT | 12.8  | 36  | 12 | + | - |                                             | <i>prtF2, sfb1</i> | + | + | + | - | + | + | C,G,H,I,Z   | 1 | -                 | 52  | 150263 | 226785 | 1807947 |
| SAMN07153500 | 20155200 | GA | 12.9  | 36  | 12 | + | - |                                             | <i>prtF2, sfb1</i> | + | + | - | - | + | + | G,H,I,Z     | 1 | <i>ermTR</i>      | 44  | 81557  | 219358 | 1819783 |
| SAMN07153921 | 20160140 | NM | 12.91 | 36  | 12 | + | - |                                             | <i>prtF2, sfb1</i> | + | + | - | - | + | + | G,H,I,Z     | 1 | -                 | 38  | 131802 | 343617 | 1765300 |
| SAMN07154269 | 20162136 | CA | 15.1  | 872 | 3  | + |   | <i>enn, mrp fbaA, prtF2, sfb1</i>           |                    | + | - | - | - | - | - | A,C,G,Z     | 1 | -                 | 27  | 155402 | 434173 | 1721307 |
| SAMN07153236 | 20154046 | CA | 18.12 | 535 | 3  | + |   | <i>enn, mrp fbaA, prtF2, sfb1</i>           |                    | + | - | - | - | - | - | A,G,K,Z     | 1 | <i>tetM</i>       | 40  | 126122 | 287636 | 1827262 |
| SAMN07153835 | 20156711 | CT | 18.7  | 42* | 49 | + |   | <i>enn prtF2</i>                            |                    | + | - | - | + | - | - | C,G,L,M,S,Z | 1 | <i>folA-D14E</i>  | 158 | 39245  | 142589 | 1923556 |
| SAMN07153146 | 20153542 | OR | 22    | 46  | 12 | + |   | <i>enn, mrp fbaA, prtF2, sfb1, sof</i>      |                    | - | - | - | - | + | + | G,K,S,Z     | 8 | -                 | 40  | 97513  | 204452 | 1767690 |
| SAMN07153155 | 20153562 | GA | 22    | 46  | 12 | + |   | <i>enn, mrp fbaA, prtF2, sfb1, sof</i>      |                    | - | - | - | - | + | + | A,G,S,Z     | 8 | <i>tetM</i>       | 40  | 85627  | 204861 | 1842749 |
| SAMN07153731 | 20156362 | NM | 22    | 46  | 12 | + |   | <i>enn, mrp fbaA, prtF2, sfb1, sof</i>      |                    | - | - | - | - | + | + | C,G,S,Z     | 8 | -                 | 43  | 113487 | 204807 | 1829463 |
| SAMN07154025 | 20160937 | TN | 22    | 46  | 12 | + |   | <i>enn, mrp fbaA, prtF2, sfb1, sof</i>      |                    | - | - | - | - | + | + | G,S,Z       | 8 | -                 | 35  | 97390  | 203971 | 1748244 |
| SAMN07154393 | 20163526 | NM | 22    | 46  | 12 | + |   | <i>enn, mrp fbaA, prtF2, sfb1, sof</i>      |                    | - | - | - | - | + | + | C,G,S,Z     | 8 | -                 | 52  | 113435 | 204736 | 1796570 |
| SAMN07154032 | 20160946 | CT | 24.8  | 70  | -  | + | - |                                             | <i>fbaA, sfb1</i>  | + | + | - | - | - | - | A,G,K,Z     | 8 | -                 | 81  | 74839  | 218779 | 1916132 |
| SAMN07153709 | 20156188 | MN | 25.1  | 192 | -  | + |   | <i>mrp fbaA, sfb1, sof</i>                  |                    | + | - | - | - | - | + | G,Z         | 1 | <i>tetM</i>       | 30  | 133172 | 232115 | 1875770 |
| SAMN07154115 | 20161207 | OR | 25.1  | 192 | -  | + |   | <i>enn, mrp fbaA, sfb1, sof</i>             |                    | + | - | - | - | - | + | G,Z         | 1 | <i>tetM</i>       | 30  | 163198 | 332451 | 1877876 |
| SAMN07153603 | 20155615 | MD | 27    | 308 | 5  | + |   | <i>enn, mrp fbaA, prtF2, sfb1, sof</i>      |                    | + | + | - | - | - | + | C,G,I,Z     | 8 | -                 | 60  | 100230 | 285701 | 1831918 |
| SAMN07154378 | 20163031 | TN | 27    | 308 | 5  | + |   | <i>enn, mrp fbaA, prtF2, sfb1, sof</i>      |                    | + | + | - | - | - | + | C,G,I,Z     | 8 | <i>ermB, tetM</i> | 81  | 96527  | 189468 | 1941450 |
| SAMN07152969 | 20151646 | GA | 28    | 52  | 28 | + |   | <i>enn, mrp fbaA, prtF2, R28, sfb1, sof</i> |                    | + | - | - | - | - | - | C,G,I,Z     | 1 | -                 | 25  | 228300 | 330309 | 1815868 |
| SAMN07152999 | 20152302 | OR | 28    | 52  | 28 | + |   | <i>enn, mrp fbaA, prtF2, R28, sfb1, sof</i> |                    | + | - | - | - | - | - | C,G,Z       | 1 | -                 | 86  | 43133  | 101959 | 1834780 |

|              |          |    |    |    |    |   |                 |                                    |   |   |   |   |   |   |           |   |                 |    |        |        |         |
|--------------|----------|----|----|----|----|---|-----------------|------------------------------------|---|---|---|---|---|---|-----------|---|-----------------|----|--------|--------|---------|
| SAMN07153037 | 20152747 | NM | 28 | 52 | 28 | + | <i>enn, mrp</i> | <i>fbaA, prtF2, R28, sfb1, sof</i> | + | - | - | - | - | - | C,G,I,Z   | 1 | -               | 31 | 146991 | 299257 | 1851476 |
| SAMN07153107 | 20153100 | TN | 28 | 52 | 28 | + | <i>enn, mrp</i> | <i>fbaA, prtF2, R28, sfb1, sof</i> | + | - | - | - | - | - | C,G,I,K,Z | 1 | -               | 53 | 85973  | 178084 | 1933513 |
| SAMN07153110 | 20153104 | NY | 28 | 52 | 28 | + | <i>enn, mrp</i> | <i>fbaA, prtF2, R28, sfb1, sof</i> | + | - | - | - | - | - | C,G,I,K,Z | 1 | -               | 26 | 207995 | 459435 | 1870429 |
| SAMN07153114 | 20153108 | NY | 28 | 52 | 28 | + | <i>enn, mrp</i> | <i>fbaA, prtF2, R28, sfb1, sof</i> | + | - | - | - | - | - | G,I,Z     | 1 | -               | 33 | 156086 | 243559 | 1848877 |
| SAMN07153134 | 20153487 | NY | 28 | 52 | 28 | + | <i>enn, mrp</i> | <i>fbaA, prtF2, R28, sfb1, sof</i> | + | - | - | - | - | - | C,G,I,Z   | 1 | -               | 21 | 243508 | 544619 | 1864440 |
| SAMN07153187 | 20153616 | CO | 28 | 52 | 28 | + | <i>enn, mrp</i> | <i>fbaA, prtF2, R28, sfb1, sof</i> | + | - | - | - | - | - | C,G,I,Z   | 1 | -               | 26 | 243588 | 459236 | 1826081 |
| SAMN07153215 | 20154024 | CA | 28 | 52 | 28 | + | <i>enn, mrp</i> | <i>fbaA, prtF2, R28, sfb1, sof</i> | + | - | - | - | - | - | C,G,I,Z   | 1 | -               | 26 | 195974 | 330377 | 1827928 |
| SAMN07153336 | 20154567 | CT | 28 | 52 | 28 | + | <i>enn, mrp</i> | <i>fbaA, prtF2, R28, sfb1, sof</i> | + | - | - | - | - | - | C,G,I,Z   | 1 | -               | 23 | 243416 | 503754 | 1824499 |
| SAMN07153358 | 20154611 | TN | 28 | 52 | 28 | + | <i>enn, mrp</i> | <i>fbaA, prtF2, R28, sfb1, sof</i> | + | - | - | - | - | - | C,G,I,K,Z | 1 | -               | 32 | 185738 | 459217 | 1865496 |
| SAMN07153419 | 20154943 | OR | 28 | 52 | 28 | + | <i>enn, mrp</i> | <i>fbaA, prtF2, R28, sfb1, sof</i> | + | - | - | - | - | - | C,G,I,Z   | 1 | -               | 29 | 243480 | 459436 | 1825585 |
| SAMN07153431 | 20154963 | NY | 28 | 52 | 28 | + | <i>enn, mrp</i> | <i>fbaA, prtF2, R28, sfb1, sof</i> | + | - | - | - | - | - | C,G,I,K,Z | 1 | -               | 22 | 189321 | 459223 | 1871291 |
| SAMN07153437 | 20154969 | NY | 28 | 52 | 28 | + | <i>enn, mrp</i> | <i>fbaA, prtF2, R28, sfb1, sof</i> | + | - | - | - | - | - | C,G,I,K,Z | 1 | -               | 24 | 210202 | 310884 | 1870674 |
| SAMN07153462 | 20155040 | MN | 28 | 52 | 28 | + | <i>enn, mrp</i> | <i>fbaA, prtF2, R28, sfb1, sof</i> | + | - | - | - | - | - | C,G,I,Z   | 1 | -               | 24 | 208018 | 330199 | 1829821 |
| SAMN07153466 | 20155044 | MN | 28 | 52 | 28 | + | <i>enn, mrp</i> | <i>fbaA, prtF2, R28, sfb1, sof</i> | + | - | - | - | - | - | C,G,I,Z   | 1 | -               | 24 | 224319 | 330233 | 1826098 |
| SAMN07153485 | 20155064 | MN | 28 | 52 | 28 | + | <i>enn, mrp</i> | <i>fbaA, prtF2, R28, sfb1, sof</i> | + | - | - | - | - | - | C,G,I,Z   | 1 | -               | 33 | 103130 | 243592 | 1827064 |
| SAMN07153494 | 20155194 | GA | 28 | 52 | 28 | + | <i>enn, mrp</i> | <i>fbaA, prtF2, R28, sfb1, sof</i> | + | - | - | - | - | - | C,G,I,Z   | 1 | -               | 51 | 63609  | 167555 | 1829302 |
| SAMN07153520 | 20155361 | CT | 28 | 52 | 28 | + | <i>enn, mrp</i> | <i>fbaA, prtF2, R28, sfb1, sof</i> | + | - | - | - | - | - | C,G,I,Z   | 1 | -               | 33 | 180523 | 459487 | 1858013 |
| SAMN07153526 | 20155367 | CT | 28 | 52 | 28 | + | <i>enn, mrp</i> | <i>fbaA, prtF2, R28, sfb1, sof</i> | + | - | - | - | - | - | C,G,I,Z   | 1 | <i>parC-S6F</i> | 28 | 202619 | 272582 | 1828162 |
| SAMN07153534 | 20155375 | CT | 28 | 52 | 28 | + | <i>enn, mrp</i> | <i>fbaA, prtF2, R28, sfb1, sof</i> | + | - | - | - | - | - | C,G,I,Z   | 1 | -               | 31 | 221709 | 459458 | 1826356 |
| SAMN07153554 | 20155406 | NY | 28 | 52 | 28 | + | <i>enn, mrp</i> | <i>fbaA, prtF2, R28, sfb1, sof</i> | + | - | - | - | - | - | C,G,I,K,Z | 1 | -               | 37 | 105913 | 222261 | 1869430 |
| SAMN07153576 | 20155584 | TN | 28 | 52 | 28 | + | <i>enn, mrp</i> | <i>fbaA, prtF2, R28, sfb1, sof</i> | + | - | - | - | - | - | C,G,I,K,Z | 1 | -               | 52 | 79910  | 449616 | 1904560 |
| SAMN07153589 | 20155600 | MD | 28 | 52 | 28 | + | <i>enn, mrp</i> | <i>fbaA, prtF2, R28, sfb1, sof</i> | + | - | - | - | - | - | C,G,I,Z   | 1 | -               | 56 | 243476 | 459481 | 1841208 |
| SAMN07153723 | 20156320 | GA | 28 | 52 | 28 | + | <i>enn, mrp</i> | <i>fbaA, prtF2, R28, sfb1, sof</i> | + | - | - | - | - | - | A,G,I,Z   | 1 | <i>parC-S6F</i> | 29 | 195813 | 326787 | 1811355 |
| SAMN07153753 | 20156407 | CA | 28 | 52 | 28 | + | <i>enn, mrp</i> | <i>fbaA, prtF2, R28, sfb1, sof</i> | + | - | - | - | - | - | C,G,I,K,Z | 1 | -               | 30 | 110690 | 459445 | 1866827 |
| SAMN07153754 | 20156408 | CA | 28 | 52 | 28 | + | <i>enn, mrp</i> | <i>fbaA, prtF2, R28, sfb1, sof</i> | + | - | - | - | - | - | C,G,I,K,Z | 1 | -               | 34 | 146828 | 279543 | 1867594 |
| SAMN07153905 | 20160033 | CO | 28 | 52 | 28 | + | <i>enn, mrp</i> | <i>fbaA, prtF2, R28, sfb1, sof</i> | + | - | - | - | - | - | C,G,Z     | 1 | -               | 27 | 242990 | 500029 | 1826585 |
| SAMN07153919 | 20160138 | NM | 28 | 52 | 28 | + | <i>enn, mrp</i> | <i>fbaA, prtF2, R28, sfb1, sof</i> | + | - | - | - | - | - | A,G,I,Z   | 1 | -               | 27 | 179567 | 281597 | 1891483 |
| SAMN07153958 | 20160315 | MN | 28 | 52 | 28 | + | <i>enn, mrp</i> | <i>fbaA, prtF2, R28, sof</i>       | + | - | - | - | - | - | C,G,I,Z   | 1 | -               | 30 | 115520 | 256707 | 1831597 |
| SAMN07153969 | 20160326 | MN | 28 | 52 | 28 | + | <i>enn, mrp</i> | <i>fbaA, prtF2, R28, sfb1, sof</i> | + | - | - | - | - | - | C,G,I,Z   | 1 | -               | 25 | 239385 | 459416 | 1831570 |
| SAMN07154033 | 20160947 | CT | 28 | 52 | 28 | + | <i>enn, mrp</i> | <i>fbaA, prtF2, R28, sfb1, sof</i> | + | - | - | - | - | - | C,G,I,Z   | 1 | -               | 33 | 144777 | 447518 | 1847149 |
| SAMN07154117 | 20161232 | NY | 28 | 52 | 28 | + | <i>enn, mrp</i> | <i>fbaA, prtF2, R28, sfb1, sof</i> | + | - | - | - | - | - | C,G,I,Z   | 1 | -               | 28 | 243584 | 500380 | 1868104 |
| SAMN07154120 | 20161235 | NY | 28 | 52 | 28 | + | <i>enn, mrp</i> | <i>fbaA, prtF2, R28, sfb1, sof</i> | + | - | - | - | - | - | C,G,I,Z   | 1 | -               | 29 | 224584 | 327178 | 1867963 |
| SAMN07154121 | 20161236 | NY | 28 | 52 | 28 | + | <i>enn, mrp</i> | <i>fbaA, prtF2, R28, sfb1, sof</i> | + | - | - | - | - | - | C,G,I,Z   | 1 | -               | 28 | 162864 | 330418 | 1867717 |
| SAMN07154153 | 20161437 | MN | 28 | 52 | 28 | + | <i>enn, mrp</i> | <i>fbaA, prtF2, R28, sfb1, sof</i> | + | - | - | - | - | - | C,G,I,Z   | 1 | -               | 33 | 210016 | 330139 | 1824269 |
| SAMN07154289 | 20162157 | CA | 28 | 52 | 28 | + | <i>enn, mrp</i> | <i>fbaA, prtF2, R28, sfb1, sof</i> | + | - | - | - | - | - | C,G,I,Z   | 1 | -               | 24 | 216308 | 279468 | 1835383 |
| SAMN07154298 | 20162325 | NY | 28 | 52 | 28 | + | <i>enn, mrp</i> | <i>fbaA, prtF2, R28, sfb1, sof</i> | + | - | - | - | - | - | C,G,I,K,Z | 1 | -               | 50 | 214126 | 503682 | 1873206 |
| SAMN07154314 | 20162422 | MN | 28 | 52 | 28 | + | <i>enn, mrp</i> | <i>fbaA, prtF2, R28, sfb1, sof</i> | + | - | - | - | - | - | C,G,I,Z   | 1 | -               | 38 | 224467 | 295434 | 1830114 |
| SAMN07154343 | 20162643 | CO | 28 | 52 | 28 | + | <i>enn, mrp</i> | <i>fbaA, prtF2, R28, sfb1, sof</i> | + | - | - | - | - | - | C,G,I,Z   | 1 | -               | 36 | 210252 | 330098 | 1830601 |
| SAMN07154363 | 20162663 | CO | 28 | 52 | 28 | + | <i>enn, mrp</i> | <i>fbaA, prtF2, R28, sfb1, sof</i> | + | - | - | - | - | - | C,G,Z     | 1 | -               | 38 | 115557 | 242962 | 1849377 |
| SAMN07154386 | 20163040 | TN | 28 | 52 | 28 | + | <i>enn, mrp</i> | <i>fbaA, prtF2, R28, sof</i>       | + | - | - | - | - | - | C,G,I,Z   | 1 | -               | 32 | 199769 | 327079 | 1824983 |
| SAMN07154388 | 20163068 | CT | 28 | 52 | 28 | + | <i>enn, mrp</i> | <i>fbaA, prtF2, R28, sfb1, sof</i> | + | - | - | - | - | - | C,G,Z     | 1 | -               | 31 | 136592 | 314859 | 1808754 |
| SAMN07154419 | 20164927 | CO | 28 | 52 | 28 | + | <i>enn, mrp</i> | <i>fbaA, prtF2, R28, sfb1, sof</i> | + | - | - | - | - | - | A,C,G,Z   | 1 | -               | 55 | 163606 | 275488 | 1856700 |
| SAMN07152966 | 20151537 | GA | 28 | 52 | 28 | + | <i>enn, mrp</i> | <i>fbaA, prtF2, R28, sfb1, sof</i> | + | - | - | - | - | + | C,G,I,Z   | 1 | -               | 37 | 168936 | 458698 | 1828695 |
| SAMN07152996 | 20152282 | TN | 28 | 52 | 28 | + | <i>enn, mrp</i> | <i>fbaA, prtF2, R28, sfb1, sof</i> | + | - | - | - | - | + | C,G,I,Z   | 1 | -               | 30 | 189474 | 327327 | 1829431 |
| SAMN07153013 | 20152517 | MN | 28 | 52 | 28 | + | <i>enn, mrp</i> | <i>fbaA, prtF2, R28, sfb1, sof</i> | + | - | - | - | - | + | C,G,I,Z   | 1 | -               | 79 | 53988  | 157191 | 1823774 |



|              |          |    |    |     |    |   |                 |                                    |   |   |   |   |   |   |               |   |              |    |        |        |         |
|--------------|----------|----|----|-----|----|---|-----------------|------------------------------------|---|---|---|---|---|---|---------------|---|--------------|----|--------|--------|---------|
| SAMN07153018 | 20152522 | MN | 28 | 52  | 28 | + | <i>enn, mrp</i> | <i>fbaA, prtF2, R28, sfb1, sof</i> | + | - | - | - | - | + | C,G,I,Z       | 1 | -            | 33 | 115662 | 283093 | 1846395 |
| SAMN07153075 | 20152974 | OR | 28 | 52  | 28 | + | <i>enn, mrp</i> | <i>fbaA, prtF2, R28, sfb1, sof</i> | + | - | - | - | - | + | C,G,I,Z       | 1 | -            | 39 | 135966 | 328171 | 1833376 |
| SAMN07153132 | 20153485 | NY | 28 | 52  | 28 | + | <i>enn, mrp</i> | <i>fbaA, prtF2, R28, sfb1, sof</i> | + | - | - | - | - | + | C,G,I,Z       | 1 | -            | 38 | 82460  | 280645 | 1828422 |
| SAMN07153264 | 20154146 | MN | 28 | 52  | 28 | + | <i>enn, mrp</i> | <i>fbaA, prtF2, R28, sfb1, sof</i> | + | - | - | - | - | + | C,G,I,Z       | 1 | <i>ermTR</i> | 26 | 243596 | 459004 | 1870027 |
| SAMN07153265 | 20154147 | MN | 28 | 52  | 28 | + | <i>enn, mrp</i> | <i>fbaA, prtF2, R28, sfb1, sof</i> | + | - | - | - | - | + | C,G,I,Z       | 1 | -            | 25 | 243499 | 458456 | 1823074 |
| SAMN07153325 | 20154555 | CT | 28 | 52  | 28 | + | <i>enn, mrp</i> | <i>fbaA, prtF2, R28, sfb1, sof</i> | + | - | - | - | - | + | C,G,I,Z       | 1 | -            | 33 | 146110 | 458062 | 1827487 |
| SAMN07153330 | 20154560 | CT | 28 | 52  | 28 | - | <i>enn, mrp</i> | <i>fbaA, prtF2, R28, sfb1, sof</i> | + | - | - | - | - | + | A,G,H,I,J,Z   | 1 | -            | 22 | 199884 | 458700 | 1856575 |
| SAMN07153341 | 20154594 | TN | 28 | 52  | 28 | + | <i>enn, mrp</i> | <i>fbaA, prtF2, R28, sfb1, sof</i> | + | - | - | - | - | + | C,G,I,Z       | 1 | -            | 29 | 189149 | 295243 | 1825240 |
| SAMN07153349 | 20154602 | TN | 28 | 52  | 28 | + | <i>enn, mrp</i> | <i>fbaA, prtF2, R28, sfb1, sof</i> | + | - | - | - | - | + | C,G,I,Z       | 1 | -            | 30 | 243706 | 458922 | 1825593 |
| SAMN07153364 | 20154618 | TN | 28 | 52  | 28 | + | <i>enn, mrp</i> | <i>fbaA, prtF2, R28, sfb1, sof</i> | + | - | - | - | - | + | C,G,I,Z       | 1 | -            | 39 | 212096 | 292128 | 1828201 |
| SAMN07153440 | 20155016 | MN | 28 | 52  | 28 | + | <i>enn, mrp</i> | <i>fbaA, prtF2, R28, sfb1, sof</i> | + | - | - | - | - | + | C,G,I,Z       | 1 | -            | 30 | 194403 | 459032 | 1859840 |
| SAMN07153509 | 20155265 | NM | 28 | 52  | 28 | + | <i>enn, mrp</i> | <i>fbaA, prtF2, R28, sfb1, sof</i> | + | - | - | - | - | + | A,G,I,K,Z     | 1 | -            | 23 | 243556 | 458891 | 1858571 |
| SAMN07153562 | 20155414 | NY | 28 | 52  | 28 | + | <i>enn, mrp</i> | <i>fbaA, prtF2, R28, sfb1, sof</i> | + | - | - | - | - | + | C,G,I,Z       | 1 | -            | 31 | 113602 | 392054 | 1826296 |
| SAMN07153620 | 20155632 | MD | 28 | 52  | 28 | + | <i>enn, mrp</i> | <i>fbaA, prtF2, R28, sfb1, sof</i> | + | - | - | - | - | + | C,G,I,Z       | 1 | -            | 28 | 147058 | 458381 | 1824870 |
| SAMN07153649 | 20155661 | MD | 28 | 52  | 28 | + | <i>enn, mrp</i> | <i>fbaA, prtF2, R28, sfb1, sof</i> | + | - | - | - | - | + | C,G,I,Z       | 1 | -            | 30 | 243592 | 458433 | 1826072 |
| SAMN07153684 | 20156163 | MN | 28 | 52  | 28 | + | <i>enn, mrp</i> | <i>fbaA, prtF2, R28, sfb1, sof</i> | + | - | - | - | - | + | C,G,I,Z       | 1 | -            | 29 | 243540 | 458971 | 1810505 |
| SAMN07153702 | 20156181 | MN | 28 | 52  | 28 | + | <i>enn, mrp</i> | <i>fbaA, prtF2, R28, sfb1, sof</i> | + | - | - | - | - | + | C,G,I,Z       | 1 | -            | 37 | 115002 | 250618 | 1859652 |
| SAMN07153782 | 20156438 | CA | 28 | 52  | 28 | + | <i>enn, mrp</i> | <i>fbaA, prtF2, R28, sfb1, sof</i> | + | - | - | - | - | + | C,G,I,Z       | 1 | -            | 34 | 210289 | 280482 | 1825295 |
| SAMN07153875 | 20160001 | CO | 28 | 52  | 28 | + | <i>enn, mrp</i> | <i>fbaA, prtF2, R28, sfb1, sof</i> | + | - | - | - | - | + | C,G,I,Z       | 1 | -            | 27 | 243478 | 503327 | 1824462 |
| SAMN07153893 | 20160020 | CO | 28 | 52  | 28 | + | <i>enn, mrp</i> | <i>fbaA, prtF2, R28, sfb1, sof</i> | + | - | - | - | - | + | C,G,I,K,Z     | 1 | -            | 32 | 230263 | 502951 | 1923161 |
| SAMN07153903 | 20160030 | CO | 28 | 52  | 28 | + | <i>enn, mrp</i> | <i>fbaA, prtF2, R28, sfb1, sof</i> | + | - | - | - | - | + | C,G,I,Z       | 1 | -            | 35 | 243753 | 503321 | 1831686 |
| SAMN07153970 | 20160327 | MN | 28 | 52  | 28 | + | <i>enn, mrp</i> | <i>fbaA, prtF2, R28, sfb1, sof</i> | + | - | - | - | - | + | C,G,I,Z       | 1 | -            | 27 | 243572 | 458980 | 1852866 |
| SAMN07154063 | 20161021 | NM | 28 | 52  | 28 | + | <i>enn, mrp</i> | <i>fbaA, prtF2, R28, sfb1, sof</i> | + | - | - | - | - | + | C,G,I,Z       | 1 | -            | 32 | 182036 | 458503 | 1877700 |
| SAMN07154084 | 20161078 | CO | 28 | 52  | 28 | + | <i>enn, mrp</i> | <i>fbaA, prtF2, R28, sfb1, sof</i> | + | - | - | - | - | + | C,G,I,Z       | 1 | -            | 26 | 243482 | 458819 | 1826380 |
| SAMN07154158 | 20161442 | MN | 28 | 52  | 28 | + | <i>enn, mrp</i> | <i>fbaA, prtF2, R28, sfb1, sof</i> | + | - | - | - | - | + | C,G,I,Z       | 1 | -            | 26 | 243504 | 458945 | 1811318 |
| SAMN07154236 | 20161875 | TN | 28 | 52  | 28 | + | <i>enn, mrp</i> | <i>fbaA, prtF2, R28, sfb1, sof</i> | + | - | - | - | - | + | C,G,I,Z       | 1 | -            | 22 | 243532 | 503441 | 1824879 |
| SAMN07154337 | 20162637 | CO | 28 | 52  | 28 | + | <i>enn, mrp</i> | <i>fbaA, prtF2, R28, sfb1, sof</i> | + | - | - | - | - | + | C,G,I,Z       | 1 | -            | 48 | 217137 | 503031 | 1830016 |
| SAMN07154355 | 20162655 | CO | 28 | 52  | 28 | + | <i>enn, mrp</i> | <i>fbaA, prtF2, R28, sfb1, sof</i> | + | - | - | - | - | + | C,G,I,Z       | 1 | -            | 32 | 221601 | 503331 | 1831161 |
| SAMN07154367 | 20162667 | CO | 28 | 52  | 28 | + | <i>enn, mrp</i> | <i>fbaA, prtF2, R28, sfb1, sof</i> | + | - | - | - | - | + | C,G,I,Z       | 1 | -            | 40 | 243424 | 458842 | 1828906 |
| SAMN07154387 | 20163041 | TN | 28 | 52  | 28 | + | <i>enn, mrp</i> | <i>fbaA, prtF2, R28, sfb1, sof</i> | + | - | - | - | - | + | C,G,I,Z       | 1 | -            | 32 | 243650 | 458843 | 1829594 |
| SAMN07154412 | 20164920 | CO | 28 | 52  | 28 | + | <i>enn, mrp</i> | <i>fbaA, prtF2, R28, sfb1, sof</i> | + | - | - | - | - | + | C,G,I,Z       | 1 | -            | 32 | 243546 | 458947 | 1830593 |
| SAMN07154248 | 20162115 | CA | 28 | 456 | 28 | + | <i>enn, mrp</i> | <i>fbaA, prtF2, R28, sfb1, sof</i> | + | - | - | - | - | - | C,G,H,I,J,K,Z | 1 | -            | 30 | 209964 | 494610 | 1932911 |
| SAMN07154257 | 20162124 | CA | 28 | 456 | 28 | + | <i>enn, mrp</i> | <i>fbaA, prtF2, R28, sfb1, sof</i> | + | - | - | - | - | - | C,G,H,I,J,K,Z | 1 | -            | 32 | 209892 | 494538 | 1932386 |
| SAMN07153073 | 20152972 | OR | 28 | 458 | 28 | + | <i>enn, mrp</i> | <i>fbaA, prtF2, R28, sfb1, sof</i> | + | - | - | - | - | - | C,G,I,Z       | 1 | -            | 22 | 224526 | 330331 | 1835842 |
| SAMN07153152 | 20153559 | GA | 28 | 458 | 28 | + | <i>enn, mrp</i> | <i>fbaA, prtF2, R28, sfb1, sof</i> | + | - | - | - | - | - | C,G,I,K,Z     | 1 | -            | 36 | 147297 | 426594 | 1864204 |
| SAMN07153185 | 20153614 | CO | 28 | 458 | 28 | + | <i>enn, mrp</i> | <i>fbaA, prtF2, R28, sfb1, sof</i> | + | - | - | - | - | - | C,G,I,Z       | 1 | -            | 48 | 65359  | 113125 | 1830231 |
| SAMN07153866 | 20156790 | MD | 28 | 458 | 28 | + | <i>enn, mrp</i> | <i>fbaA, prtF2, R28, sfb1, sof</i> | + | - | - | - | - | - | C,G,I,Z       | 1 | -            | 33 | 183534 | 339631 | 1849911 |
| SAMN07153870 | 20156794 | MD | 28 | 458 | 28 | + | <i>enn, mrp</i> | <i>fbaA, prtF2, R28, sfb1, sof</i> | + | - | - | - | - | - | C,G,I,Z       | 1 | -            | 30 | 202781 | 327315 | 1832173 |
| SAMN07153889 | 20160016 | CO | 28 | 458 | 28 | + | <i>enn, mrp</i> | <i>fbaA, prtF2, R28, sfb1, sof</i> | + | - | - | - | - | - | C,G,I,K,Z     | 1 | -            | 24 | 150698 | 457057 | 1864672 |
| SAMN07153933 | 20160177 | GA | 28 | 458 | 28 | + | <i>enn, mrp</i> | <i>fbaA, prtF2, R28, sfb1, sof</i> | + | - | - | - | - | - | C,G,I,Z       | 1 | -            | 29 | 243580 | 459478 | 1835313 |
| SAMN07153985 | 20160457 | GA | 28 | 458 | 28 | + | <i>enn, mrp</i> | <i>fbaA, prtF2, R28, sfb1, sof</i> | + | - | - | - | - | - | C,G,I,Z       | 1 | -            | 34 | 144884 | 459488 | 1866280 |
| SAMN07154005 | 20160751 | MD | 28 | 458 | 28 | + | <i>enn, mrp</i> | <i>fbaA, prtF2, R28, sfb1, sof</i> | + | - | - | - | - | - | C,G,I,Z       | 1 | -            | 28 | 151861 | 459237 | 1844945 |
| SAMN07154014 | 20160760 | MD | 28 | 458 | 28 | + | <i>enn, mrp</i> | <i>fbaA, prtF2, R28, sfb1, sof</i> | + | - | - | - | - | - | C,G,I,Z       | 1 | -            | 26 | 243560 | 509289 | 1871500 |
| SAMN07152995 | 20152280 | GA | 28 | 845 | 28 | + | <i>enn, mrp</i> | <i>fbaA, prtF2, R28, sfb1, sof</i> | + | - | - | - | - | + | C,G,I,Z       | 1 | -            | 74 | 63403  | 103481 | 1877009 |
| SAMN07153082 | 20152981 | OR | 28 | 850 | 28 | + | <i>enn, mrp</i> | <i>fbaA, prtF2, R28, sfb1, sof</i> | + | - | - | - | - | + | C,G,I         | 1 | -            | 36 | 103830 | 459017 | 1827086 |

|              |          |    |       |     |    |   |                 |                                    |   |   |   |   |   |   |             |    |                               |     |        |        |         |
|--------------|----------|----|-------|-----|----|---|-----------------|------------------------------------|---|---|---|---|---|---|-------------|----|-------------------------------|-----|--------|--------|---------|
| SAMN07153420 | 20154944 | OR | 28    | 850 | 28 | + | <i>enn, mrp</i> | <i>fbaA, prtF2, R28, sfb1, sof</i> | + | - | - | - | - | + | C,G,I,Z     | 1  | -                             | 21  | 243455 | 503376 | 1828336 |
| SAMN07153394 | 20154796 | CO | 28    | 859 | 28 | + | <i>enn, mrp</i> | <i>fbaA, prtF2, R28, sfb1, sof</i> | + | - | - | - | - | + | C,G,J,K,Z   | 1  | -                             | 34  | 213852 | 503087 | 1902445 |
| SAMN07153822 | 20156635 | TN | 28    | 859 | 28 | + | <i>enn, mrp</i> | <i>fbaA, prtF2, R28, sfb1, sof</i> | + | - | - | - | - | + | C,G,J,Z     | 1  | -                             | 31  | 243383 | 392274 | 1857192 |
| SAMN07154010 | 20160756 | MD | 29.14 | 12  | 91 | + | -               | <i>prtF2</i>                       | + | - | - | + | - | - | G,I,M,Z     | 1  | -                             | 37  | 170743 | 287113 | 1805392 |
| SAMN07154427 | 20170001 | TN | 33    | 3   | 83 | + | <i>enn, mrp</i> | <i>fbaA, prtF2</i>                 | + | - | - | - | - | - | G,J,L,M,S,Z | 1  | -                             | 33  | 133132 | 336043 | 1837983 |
| SAMN07153262 | 20154144 | MN | 41.2  | 579 | 83 | + | <i>enn, mrp</i> | <i>fbaA, prtF2</i>                 | + | - | - | - | - | - | C,G,L,M,Z   | 15 | -                             | 45  | 103857 | 235768 | 1795786 |
| SAMN07154164 | 20161448 | MN | 41.2  | 579 | 83 | + | <i>enn, mrp</i> | <i>fbaA, prtF2</i>                 | + | - | - | - | - | - | C,G,L,M,Z   | 15 | -                             | 43  | 103813 | 235790 | 1793490 |
| SAMN07154309 | 20162417 | MN | 41.2  | 579 | 83 | + | <i>enn, mrp</i> | <i>fbaA, prtF2</i>                 | + | - | - | - | - | - | C,G,L,M,Z   | 15 | -                             | 106 | 93723  | 254944 | 1787883 |
| SAMN07154103 | 20161097 | CO | 42    | 80  | 3  | + | <i>enn, mrp</i> | <i>fbaA, prtF2</i>                 | + | - | - | - | - | - | G,H,I,Z     | 1  | -                             | 24  | 239982 | 532332 | 1745989 |
| SAMN07152982 | 20152225 | NY | 44    | 25  | 5  | + | <i>mrp</i>      | <i>fbaA, prtF2, sfb1, sof</i>      | + | - | - | - | - | - | G,I,S,Z     | 1  | <i>tetM</i>                   | 75  | 47956  | 111679 | 1872535 |
| SAMN07153337 | 20154590 | TN | 44    | 25  | 5  | + | <i>enn, mrp</i> | <i>fbaA, prtF2, sfb1, sof</i>      | + | - | - | - | - | - | G,I,S,Z     | 1  | -                             | 38  | 121827 | 240523 | 1845117 |
| SAMN07154016 | 20160762 | MD | 44    | 25  | 5  | + | <i>mrp</i>      | <i>fbaA, prtF2, sfb1, sof</i>      | + | - | - | - | - | - | G,I,S,Z     | 1  | -                             | 37  | 94625  | 233006 | 1836184 |
| SAMN07153565 | 20155417 | NY | 44    | 641 | -  | + | <i>enn, mrp</i> | <i>fbaA, sfb1, sof</i>             | + | - | - | - | - | + | G,H,I,K     | 1  | <i>tetM</i>                   | 33  | 182374 | 399963 | 1901292 |
| SAMN07153237 | 20154047 | CA | 49    | 433 | 49 | + | <i>enn, mrp</i> | <i>fbaA, prtF2, sof</i>            | + | - | - | - | - | + | G,H,I       | 1  | -                             | 29  | 113068 | 233445 | 1748367 |
| SAMN07153238 | 20154048 | CA | 49    | 433 | 49 | + | <i>enn, mrp</i> | <i>fbaA, prtF2, sof</i>            | + | - | - | - | - | + | G,H,I       | 1  | -                             | 31  | 103390 | 277506 | 1748235 |
| SAMN07153511 | 20155267 | NM | 49    | 433 | 49 | + | <i>enn, mrp</i> | <i>fbaA, prtF2, sof</i>            | + | - | - | - | - | + | C,G         | 1  | -                             | 29  | 134542 | 277340 | 1793838 |
| SAMN07153757 | 20156413 | CA | 49    | 433 | 49 | + | <i>enn, mrp</i> | <i>fbaA, prtF2, sof</i>            | + | - | - | - | - | + | G,H,I       | 1  | -                             | 31  | 163084 | 412462 | 1753035 |
| SAMN07153789 | 20156445 | CA | 49    | 433 | 49 | + | <i>enn, mrp</i> | <i>fbaA, prtF2, sof</i>            | + | - | - | - | - | + | G,H,I       | 1  | -                             | 28  | 177887 | 297325 | 1751746 |
| SAMN07153793 | 20156449 | CA | 49    | 433 | 49 | + | <i>enn, mrp</i> | <i>fbaA, prtF2, sof</i>            | + | - | - | - | - | + | G,H,I       | 1  | -                             | 33  | 131067 | 277097 | 1747624 |
| SAMN07153829 | 20156643 | NY | 49    | 433 | 49 | + | <i>enn, mrp</i> | <i>fbaA, prtF2, sof</i>            | + | - | - | - | - | + | C,G         | 1  | -                             | 35  | 163039 | 585425 | 1835174 |
| SAMN07154180 | 20161541 | GA | 49    | 433 | 49 | + | <i>enn, mrp</i> | <i>fbaA, prtF2, sof</i>            | + | - | - | - | - | + | C,G         | 1  | -                             | 60  | 162899 | 367622 | 1839719 |
| SAMN07154242 | 20162108 | CA | 49    | 433 | 49 | + | <i>enn, mrp</i> | <i>fbaA, prtF2, sof</i>            | + | - | - | - | - | + | G,H,I       | 1  | -                             | 24  | 163072 | 586884 | 1747978 |
| SAMN07154246 | 20162112 | CA | 49    | 433 | 49 | + | <i>enn, mrp</i> | <i>fbaA, prtF2, sof</i>            | + | - | - | - | - | + | G,H,I       | 1  | -                             | 28  | 134403 | 475183 | 1745968 |
| SAMN07154256 | 20162123 | CA | 49    | 433 | 49 | + | <i>enn, mrp</i> | <i>fbaA, prtF2, sof</i>            | + | - | - | - | - | + | G,H,I       | 1  | -                             | 40  | 163004 | 574703 | 1749707 |
| SAMN07154268 | 20162135 | CA | 49    | 433 | 49 | + | <i>enn, mrp</i> | <i>fbaA, prtF2, sof</i>            | + | - | - | - | - | + | G,H,I       | 1  | -                             | 25  | 163072 | 352795 | 1757288 |
| SAMN07154277 | 20162144 | CA | 49    | 433 | 49 | + | <i>enn, mrp</i> | <i>fbaA, prtF2, sof</i>            | + | - | - | - | - | + | G,H,I       | 1  | -                             | 36  | 112944 | 475227 | 1751368 |
| SAMN07154280 | 20162148 | CA | 49    | 433 | 49 | + | <i>enn, mrp</i> | <i>fbaA, prtF2, sof</i>            | + | - | - | - | - | + | G,H,I       | 1  | -                             | 25  | 197742 | 277327 | 1756143 |
| SAMN07154284 | 20162152 | CA | 49    | 433 | 49 | + | <i>enn, mrp</i> | <i>fbaA, prtF2, sof</i>            | + | - | - | - | - | + | G,H,I       | 1  | -                             | 41  | 81386  | 275065 | 1754078 |
| SAMN07154288 | 20162156 | CA | 49    | 433 | 49 | + | <i>enn, mrp</i> | <i>fbaA, prtF2, sof</i>            | + | - | - | - | - | + | G,H,I       | 1  | -                             | 31  | 112928 | 412420 | 1753609 |
| SAMN07154347 | 20162647 | CO | 49    | 433 | 49 | + | <i>enn, mrp</i> | <i>fbaA, prtF2, sof</i>            | + | - | - | - | - | + | C,G         | 1  | -                             | 36  | 163063 | 720526 | 1841022 |
| SAMN07154422 | 20165277 | CA | 49    | 433 | 49 | + | <i>enn, mrp</i> | <i>fbaA, prtF2, sof</i>            | + | - | - | - | - | + | G,H,I       | 1  | -                             | 32  | 93372  | 412471 | 1748845 |
| SAMN07153645 | 20155657 | MD | 49    | 862 | 49 | + | <i>enn, mrp</i> | <i>fbaA, prtF2, sof</i>            | + | - | - | - | - | + | C,G,H       | 1  | -                             | 29  | 135477 | 216693 | 1780175 |
| SAMN07154056 | 20160980 | NY | 49.1  | 29  | 49 | + | <i>enn, mrp</i> | <i>fbaA, prtF2, sof</i>            | + | - | - | - | - | + | A,G         | 1  | -                             | 28  | 163028 | 784581 | 1751442 |
| SAMN07153448 | 20155025 | MN | 54.1  | 302 | 91 | + | <i>enn, mrp</i> | <i>fbaA, prtF2</i>                 | + | - | - | - | - | - | G,Z         | 1  | -                             | 26  | 177040 | 275012 | 1742742 |
| SAMN07152977 | 20152179 | GA | 58    | 176 | 58 | + | <i>enn, mrp</i> | <i>fbaA, sfb1, sof</i>             | + | - | - | - | - | - | G,S,Z       | 1  | <i>ermTR, tetM, parC-D5N</i>  | 34  | 140943 | 217705 | 1943745 |
| SAMN07153539 | 20155380 | CT | 58    | 176 | 58 | + | <i>enn, mrp</i> | <i>fbaA, sfb1, sof</i>             | + | - | - | - | - | - | G,S,Z       | 1  | <i>ermTR, tetM, parC-D5N</i>  | 16  | 252022 | 595622 | 1896107 |
| SAMN07153664 | 20156103 | NM | 58    | 176 | 58 | + | <i>enn, mrp</i> | <i>fbaA, sfb1, sof</i>             | + | - | - | - | - | - | G,S,Z       | 1  | <i>ermTR, tetM, parC-D5N</i>  | 19  | 183022 | 465036 | 1897151 |
| SAMN07153849 | 20156726 | CT | 58    | 176 | 58 | + | <i>enn, mrp</i> | <i>fbaA, sfb1, sof</i>             | + | - | - | - | - | - | G,S,Z       | 1  | <i>ermTR, tetM, parC-D10G</i> | 25  | 219000 | 651198 | 1893742 |
| SAMN07153202 | 20154011 | CA | 58.2  | 176 | 58 | + | <i>enn, mrp</i> | <i>fbaA, sfb1, sof</i>             | + | - | - | - | - | - | C,G,H,Z     | 1  | -                             | 17  | 219250 | 465179 | 1860754 |
| SAMN07153728 | 20156359 | NM | 58.2  | 176 | 58 | + | <i>enn, mrp</i> | <i>fbaA, sfb1, sof</i>             | + | - | - | - | - | - | C,G,H,Z     | 1  | -                             | 17  | 252425 | 434642 | 1812762 |
| SAMN07153054 | 20152764 | NM | 59    | 172 | 59 | + | <i>enn, mrp</i> | <i>fbaA, prtF2, sfb1, sof</i>      | + | - | - | - | - | + | C,G,J,Z     | 1  | -                             | 25  | 187910 | 324378 | 1760488 |
| SAMN07153279 | 20154161 | MN | 59    | 172 | 59 | + | <i>enn, mrp</i> | <i>fbaA, prtF2, sfb1, sof</i>      | + | - | - | - | - | + | G,J,K,Z     | 1  | -                             | 56  | 176474 | 402938 | 1753392 |
| SAMN07153346 | 20154599 | TN | 59    | 172 | 59 | + | <i>enn, mrp</i> | <i>fbaA, prtF2, sfb1, sof</i>      | + | - | - | - | - | + | G,I,Z       | 1  | -                             | 24  | 184201 | 283253 | 1722860 |
| SAMN07153428 | 20154952 | OR | 59    | 172 | 59 | + | <i>enn, mrp</i> | <i>fbaA, prtF2, sfb1, sof</i>      | + | - | - | - | - | + | C,G,I,Z     | 1  | -                             | 36  | 187877 | 324329 | 1766822 |
| SAMN07153666 | 20156105 | NM | 59    | 172 | 59 | + | <i>enn, mrp</i> | <i>fbaA, prtF2, sfb1, sof</i>      | + | - | - | - | - | + | C,G,I,Z     | 1  | -                             | 27  | 198439 | 413162 | 1758720 |

|              |          |    |      |     |    |   |                 |                               |   |   |   |   |   |   |         |   |                 |    |        |        |         |
|--------------|----------|----|------|-----|----|---|-----------------|-------------------------------|---|---|---|---|---|---|---------|---|-----------------|----|--------|--------|---------|
| SAMN07153672 | 20156111 | NM | 59   | 172 | 59 | + | <i>enn, mrp</i> | <i>fbaA, prtF2, sfb1, sof</i> | + | - | - | - | - | + | C,G,I,Z | 1 | -               | 23 | 187970 | 324334 | 1758500 |
| SAMN07153715 | 20156266 | OR | 59   | 172 | 59 | + | <i>enn, mrp</i> | <i>fbaA, prtF2, sfb1, sof</i> | + | - | - | - | - | + | C,G,I,Z | 1 | -               | 27 | 187916 | 324405 | 1760877 |
| SAMN07153999 | 20160503 | NM | 59   | 172 | 59 | + | <i>enn, mrp</i> | <i>fbaA, prtF2, sfb1, sof</i> | + | - | - | - | - | + | C,G,I,Z | 1 | -               | 31 | 177131 | 248269 | 1762073 |
| SAMN07154208 | 20161828 | OR | 59   | 172 | 59 | + | <i>enn, mrp</i> | <i>fbaA, prtF2, sfb1, sof</i> | + | - | - | - | - | + | C,G,I,Z | 1 | -               | 65 | 60560  | 191013 | 1764375 |
| SAMN07154395 | 20163528 | NM | 59   | 172 | 59 | + | <i>enn, mrp</i> | <i>fbaA, prtF2, sfb1, sof</i> | + | - | - | - | - | + | C,G,I,Z | 1 | -               | 37 | 137059 | 291111 | 1763423 |
| SAMN07153660 | 20156099 | NM | 59   | 864 | 59 | + | <i>enn, mrp</i> | <i>fbaA, prtF2, sfb1, sof</i> | + | - | - | - | - | + | G,I,Z   | 1 | <i>gyrA-Y5C</i> | 35 | 114761 | 283238 | 1718637 |
| SAMN07153030 | 20152739 | NM | 59   | 864 | 59 | + | <i>enn, mrp</i> | <i>fbaA, prtF2, sfb1, sof</i> | + | - | - | - | - | + | G,I,Z   | 1 | -               | 31 | 152224 | 197038 | 1724827 |
| SAMN07153036 | 20152746 | NM | 59   | 864 | 59 | + | <i>enn, mrp</i> | <i>fbaA, prtF2, sfb1, sof</i> | + | - | - | - | - | + | G,I,Z   | 1 | -               | 26 | 150702 | 283301 | 1723826 |
| SAMN07153045 | 20152755 | NM | 59   | 864 | 59 | + | <i>enn, mrp</i> | <i>fbaA, prtF2, sfb1, sof</i> | + | - | - | - | - | + | G,I,Z   | 1 | -               | 25 | 189130 | 283177 | 1722307 |
| SAMN07153049 | 20152759 | NM | 59   | 864 | 59 | + | <i>enn, mrp</i> | <i>fbaA, prtF2, sfb1, sof</i> | + | - | - | - | - | + | G,I,Z   | 1 | -               | 28 | 177097 | 283297 | 1724238 |
| SAMN07153050 | 20152760 | NM | 59   | 864 | 59 | + | <i>enn, mrp</i> | <i>fbaA, prtF2, sfb1, sof</i> | + | - | - | - | - | + | G,I,Z   | 1 | -               | 24 | 197719 | 412074 | 1722588 |
| SAMN07153051 | 20152761 | NM | 59   | 864 | 59 | + | <i>enn, mrp</i> | <i>fbaA, prtF2, sfb1, sof</i> | + | - | - | - | - | + | G,I,Z   | 1 | -               | 24 | 177149 | 283269 | 1728815 |
| SAMN07153052 | 20152762 | NM | 59   | 864 | 59 | + | <i>enn, mrp</i> | <i>fbaA, prtF2, sfb1, sof</i> | + | - | - | - | - | + | G,I     | 1 | -               | 28 | 133898 | 283313 | 1724450 |
| SAMN07153053 | 20152763 | NM | 59   | 864 | 59 | + | <i>enn, mrp</i> | <i>fbaA, prtF2, sfb1, sof</i> | + | - | - | - | - | + | G,I,Z   | 1 | -               | 24 | 184249 | 282336 | 1723045 |
| SAMN07153055 | 20152765 | NM | 59   | 864 | 59 | + | <i>enn, mrp</i> | <i>fbaA, prtF2, sfb1, sof</i> | + | - | - | - | - | + | G,I,Z   | 1 | -               | 32 | 137140 | 196840 | 1725179 |
| SAMN07153056 | 20152766 | NM | 59   | 864 | 59 | + | <i>enn, mrp</i> | <i>fbaA, prtF2, sfb1, sof</i> | + | - | - | - | - | + | G,I,Z   | 1 | -               | 28 | 177176 | 197729 | 1725167 |
| SAMN07153158 | 20153573 | NM | 59   | 864 | 59 | + | <i>enn, mrp</i> | <i>fbaA, prtF2, sfb1, sof</i> | + | - | - | - | - | + | G,I,Z   | 1 | -               | 30 | 118583 | 283309 | 1718722 |
| SAMN07153159 | 20153574 | NM | 59   | 864 | 59 | + | <i>enn, mrp</i> | <i>fbaA, prtF2, sfb1, sof</i> | + | - | - | - | - | + | G,I,Z   | 1 | -               | 25 | 177053 | 283297 | 1721057 |
| SAMN07153162 | 20153577 | NM | 59   | 864 | 59 | + | <i>enn, mrp</i> | <i>fbaA, prtF2, sfb1, sof</i> | + | - | - | - | - | + | G,I,Z   | 1 | -               | 25 | 177045 | 257699 | 1717342 |
| SAMN07153288 | 20154289 | NM | 59   | 864 | 59 | + | <i>enn, mrp</i> | <i>fbaA, prtF2, sfb1, sof</i> | + | - | - | - | - | + | G,I,Z   | 1 | -               | 25 | 177166 | 283306 | 1718722 |
| SAMN07153292 | 20154293 | NM | 59   | 864 | 59 | + | <i>enn, mrp</i> | <i>fbaA, prtF2, sfb1, sof</i> | + | - | - | - | - | + | G,I,Z   | 1 | -               | 25 | 177079 | 283309 | 1724047 |
| SAMN07153378 | 20154676 | NM | 59   | 864 | 59 | + | <i>enn, mrp</i> | <i>fbaA, prtF2, sfb1, sof</i> | + | - | - | - | - | + | G,I,Z   | 1 | -               | 24 | 184193 | 283245 | 1717386 |
| SAMN07153916 | 20160135 | NM | 59   | 864 | 59 | + | <i>enn, mrp</i> | <i>fbaA, prtF2, sfb1, sof</i> | + | - | - | - | - | + | G,I,Z   | 1 | -               | 28 | 187905 | 283225 | 1715873 |
| SAMN07153917 | 20160136 | NM | 59   | 864 | 59 | + | <i>enn, mrp</i> | <i>fbaA, prtF2, sfb1, sof</i> | + | - | - | - | - | + | G,I,Z   | 1 | -               | 24 | 177087 | 283273 | 1718061 |
| SAMN07153925 | 20160144 | NM | 59   | 864 | 59 | + | <i>enn, mrp</i> | <i>fbaA, prtF2, sfb1, sof</i> | + | - | - | - | - | + | G,I,Z   | 1 | -               | 31 | 176920 | 283289 | 1719021 |
| SAMN07154293 | 20162271 | NM | 59   | 864 | 59 | + | <i>enn, mrp</i> | <i>fbaA, prtF2, sfb1, sof</i> | + | - | - | - | - | + | G,I,Z   | 1 | -               | 24 | 197561 | 412023 | 1721870 |
| SAMN07154297 | 20162278 | NM | 59   | 864 | 59 | + | <i>enn, mrp</i> | <i>fbaA, prtF2, sfb1, sof</i> | + | - | - | - | - | + | G,I,Z   | 1 | -               | 81 | 147539 | 283165 | 1738800 |
| SAMN07154394 | 20163527 | NM | 59   | 864 | 59 | + | <i>enn, mrp</i> | <i>fbaA, prtF2, sfb1, sof</i> | + | - | - | - | - | + | G,I,Z   | 1 | -               | 29 | 189198 | 283245 | 1722124 |
| SAMN07154396 | 20163529 | NM | 59   | 864 | 59 | + | <i>enn, mrp</i> | <i>fbaA, prtF2, sfb1, sof</i> | + | - | - | - | - | + | G,I,Z   | 1 | -               | 27 | 184209 | 283261 | 1723197 |
| SAMN07153040 | 20152750 | NM | 59.2 | 864 | 59 | + | <i>enn, mrp</i> | <i>fbaA, prtF2, sfb1, sof</i> | + | - | - | - | - | + | G,I,Z   | 1 | -               | 28 | 177234 | 283312 | 1724400 |
| SAMN07153043 | 20152753 | NM | 59.2 | 864 | 59 | + | <i>enn, mrp</i> | <i>fbaA, prtF2, sfb1, sof</i> | + | - | - | - | - | + | G,I,Z   | 1 | -               | 29 | 137132 | 283313 | 1724925 |
| SAMN07153046 | 20152756 | NM | 59.2 | 864 | 59 | + | <i>enn, mrp</i> | <i>fbaA, prtF2, sfb1, sof</i> | + | - | - | - | - | + | G,I,Z   | 1 | -               | 26 | 184265 | 283317 | 1724016 |
| SAMN07153287 | 20154288 | NM | 59.2 | 864 | 59 | + | <i>enn, mrp</i> | <i>fbaA, prtF2, sfb1, sof</i> | + | - | - | - | - | + | G,I,Z   | 1 | -               | 24 | 177087 | 283289 | 1718023 |
| SAMN07153296 | 20154297 | NM | 59.2 | 864 | 59 | + | <i>enn, mrp</i> | <i>fbaA, prtF2, sfb1, sof</i> | + | - | - | - | - | + | G,I,Z   | 1 | -               | 57 | 48763  | 146845 | 1722541 |
| SAMN07153297 | 20154298 | NM | 59.2 | 864 | 59 | + | <i>enn, mrp</i> | <i>fbaA, prtF2, sfb1, sof</i> | + | - | - | - | - | + | G,I,Z   | 1 | -               | 24 | 189416 | 283156 | 1721708 |
| SAMN07153512 | 20155268 | NM | 59.2 | 864 | 59 | + | <i>enn, mrp</i> | <i>fbaA, prtF2, sfb1, sof</i> | + | - | - | - | - | + | G,I,Z   | 1 | -               | 19 | 197699 | 411786 | 1722030 |
| SAMN07153669 | 20156108 | NM | 59.2 | 864 | 59 | + | <i>enn, mrp</i> | <i>fbaA, prtF2, sfb1, sof</i> | + | - | - | - | - | + | G,I,Z   | 1 | -               | 27 | 189150 | 283197 | 1718289 |
| SAMN07153986 | 20160490 | NM | 59.2 | 864 | 59 | + | <i>enn, mrp</i> | <i>fbaA, prtF2, sfb1, sof</i> | + | - | - | - | - | + | G,I,Z   | 1 | -               | 24 | 177146 | 283281 | 1714811 |
| SAMN07153994 | 20160498 | NM | 59.2 | 864 | 59 | + | <i>enn, mrp</i> | <i>fbaA, prtF2, sfb1, sof</i> | + | - | - | - | - | + | G,I,Z   | 1 | -               | 25 | 177180 | 283265 | 1718197 |
| SAMN07154067 | 20161025 | NM | 59.2 | 864 | 59 | + | <i>enn, mrp</i> | <i>fbaA, prtF2, sfb1, sof</i> | + | - | - | - | - | + | G,I,Z   | 1 | -               | 30 | 197587 | 413146 | 1722402 |
| SAMN07154068 | 20161026 | NM | 59.2 | 864 | 59 | + | <i>enn, mrp</i> | <i>fbaA, prtF2, sfb1, sof</i> | + | - | - | - | - | + | G,I,Z   | 1 | -               | 23 | 184113 | 411988 | 1722498 |
| SAMN07154127 | 20161327 | NM | 59.2 | 864 | 59 | + | <i>enn, mrp</i> | <i>fbaA, prtF2, sfb1, sof</i> | + | - | - | - | - | + | G,I,Z   | 1 | -               | 23 | 177049 | 283265 | 1717920 |
| SAMN07154129 | 20161330 | NM | 59.2 | 864 | 59 | + | <i>enn, mrp</i> | <i>fbaA, prtF2, sfb1, sof</i> | + | - | - | - | - | + | G,I,Z   | 1 | -               | 24 | 189186 | 283233 | 1717746 |
| SAMN07154130 | 20161331 | NM | 59.2 | 864 | 59 | + | <i>enn, mrp</i> | <i>fbaA, prtF2, sfb1, sof</i> | + | - | - | - | - | + | G,I,Z   | 1 | -               | 25 | 184205 | 283257 | 1718089 |
| SAMN07154296 | 20162274 | NM | 59.2 | 864 | 59 | + | <i>enn, mrp</i> | <i>fbaA, prtF2, sfb1, sof</i> | + | - | - | - | - | + | G,I,Z   | 1 | -               | 28 | 189146 | 283193 | 1723865 |

|              |          |    |      |     |    |   |                 |                                    |   |   |   |   |   |   |               |    |                                       |     |        |        |         |
|--------------|----------|----|------|-----|----|---|-----------------|------------------------------------|---|---|---|---|---|---|---------------|----|---------------------------------------|-----|--------|--------|---------|
| SAMN07154326 | 20162596 | NM | 59.2 | 864 | 59 | + | <i>enn, mrp</i> | <i>fbaA, prtF2, sfb1, sof</i>      | + | - | - | - | - | + | G,J,Z         | 1  | -                                     | 28  | 184157 | 283209 | 1723691 |
| SAMN07154391 | 20163512 | NM | 59.2 | 864 | 59 | + | <i>enn, mrp</i> | <i>fbaA, prtF2, sfb1, sof</i>      | + | - | - | - | - | + | G,J,Z         | 1  | -                                     | 33  | 135554 | 283217 | 1722218 |
| SAMN07153032 | 20152741 | NM | 59.3 | 864 | 59 | + | <i>enn, mrp</i> | <i>fbaA, prtF2, sfb1, sof</i>      | + | - | - | - | - | + | G,J,Z         | 1  | -                                     | 39  | 138220 | 190840 | 1738594 |
| SAMN07153218 | 20154028 | CA | 60.2 | 53  | -  | + | <i>enn, mrp</i> | <i>fbaA, sfb1, sof</i>             | + | - | - | - | - | + | -             | 1  | <i>tetM</i>                           | 31  | 125380 | 211705 | 1833004 |
| SAMN07154212 | 20161832 | OR | 60.2 | 53  | -  | + | <i>enn, mrp</i> | <i>fbaA, prtF2, sfb1, sof</i>      | + | - | - | - | - | + | G,Z           | 1  | <i>tetM</i>                           | 130 | 32590  | 87672  | 1853149 |
| SAMN07154239 | 20162105 | CA | 60.2 | 53  | -  | + | <i>enn</i>      | <i>fbaA, sfb1, sof</i>             | + | - | - | - | - | + | -             | 1  | <i>tetM</i>                           | 20  | 326609 | 687872 | 1835165 |
| SAMN07154272 | 20162139 | CA | 60.2 | 53  | -  | + | <i>enn</i>      | <i>fbaA, sfb1, sof</i>             | + | - | - | - | - | + | -             | 1  | <i>tetM</i>                           | 24  | 243189 | 687937 | 1836431 |
| SAMN07154287 | 20162155 | CA | 60.2 | 53  | -  | + | <i>enn, mrp</i> | <i>fbaA, sfb1, sof</i>             | + | - | - | - | - | + | -             | 1  | <i>tetM</i>                           | 24  | 243153 | 687901 | 1835591 |
| SAMN07153901 | 20160028 | CO | 63   | 210 | -  | + | <i>enn, mrp</i> | <i>fbaA, sfb1, sof</i>             | + | - | - | - | - | + | G,Z           | 1  | <i>tetM</i>                           | 22  | 243697 | 777360 | 1770988 |
| SAMN07153690 | 20156169 | MN | 63.3 | 385 | -  | + | <i>enn, mrp</i> | <i>fbaA, sfb1, sof</i>             | + | - | - | - | - | + | Z             | 1  | -                                     | 44  | 175204 | 276643 | 1775797 |
| SAMN07154196 | 20161730 | MD | 63.3 | 385 | -  | + | <i>enn, mrp</i> | <i>fbaA, sfb1, sof</i>             | + | - | - | - | - | + | Z             | 1  | -                                     | 60  | 61376  | 166574 | 1782000 |
| SAMN07154197 | 20161731 | MD | 63.3 | 385 | -  | + | <i>enn, mrp</i> | <i>fbaA, sfb1, sof</i>             | + | - | - | - | - | + | Z             | 1  | -                                     | 57  | 86037  | 200823 | 1787285 |
| SAMN07154201 | 20161737 | CT | 63.3 | 385 | -  | + | <i>enn, mrp</i> | <i>fbaA, sfb1, sof</i>             | + | - | - | - | - | + | Z             | 1  | -                                     | 66  | 85961  | 194827 | 1776189 |
| SAMN07154202 | 20161738 | CT | 63.3 | 385 | -  | + | <i>enn, mrp</i> | <i>fbaA, sfb1, sof</i>             | + | - | - | - | - | + | Z             | 1  | -                                     | 44  | 144109 | 339755 | 1777701 |
| SAMN07154191 | 20161725 | MD | 68.1 | 247 | 89 | + | <i>mrp</i>      | <i>prtF2, sfb1, sof</i>            | + | - | - | - | - | + | C,G,J,Z       | 1  | <i>tetM</i>                           | 25  | 116915 | 339358 | 1808426 |
| SAMN07153722 | 20156319 | GA | 68.3 | 247 | 89 | + | <i>enn, mrp</i> | <i>fbaA, prtF2, sfb1, sof</i>      | + | - | - | - | - | + | C,G,J,L,M,Z   | 1  | <i>tetM</i>                           | 29  | 183526 | 266070 | 1898689 |
| SAMN07153853 | 20156730 | CT | 68.3 | 247 | 89 | + | <i>enn, mrp</i> | <i>prtF2, sfb1, sof</i>            | + | - | - | - | - | + | C,G,J,L,M,Z   | 1  | <i>tetM</i>                           | 31  | 183494 | 316719 | 1854125 |
| SAMN07153975 | 20160332 | MN | 68.4 | 894 | 12 | + | <i>enn, mrp</i> | <i>fbaA, prtF2, R28, sfb1, sof</i> | + | - | - | - | - | + | C,G,J,Z       | 1  | -                                     | 25  | 183855 | 347642 | 1841350 |
| SAMN07154146 | 20161430 | MN | 68.4 | 894 | 12 | + | <i>enn, mrp</i> | <i>prtF2, R28, sfb1, sof</i>       | + | - | - | - | - | + | C,G,J,Z       | 1  | -                                     | 30  | 169984 | 390573 | 1839417 |
| SAMN07153198 | 20154005 | CA | 73   | 331 | 13 | + | <i>mrp</i>      | <i>fbaA, prtF2, sfb1, sof</i>      | + | - | - | - | - | - | G,H,I,Z       | 9  | <i>ermB</i>                           | 36  | 131850 | 320610 | 1901017 |
| SAMN07153810 | 20156622 | TN | 73   | 331 | 13 | + | <i>enn, mrp</i> | <i>fbaA, prtF2, sfb1, sof</i>      | + | + | - | - | - | - | G,H,I,Z       | 9  | <i>ermB, tetM</i>                     | 47  | 102299 | 206960 | 1942465 |
| SAMN07154037 | 20160951 | CT | 73   | 331 | 13 | + | <i>enn, mrp</i> | <i>fbaA, prtF2, sfb1, sof</i>      | + | + | - | - | - | - | C,G,H,I,Z     | 9  | <i>ermB, tetM</i>                     | 74  | 115102 | 326584 | 1975921 |
| SAMN07154062 | 20160989 | GA | 73   | 331 | 13 | + | <i>enn, mrp</i> | <i>fbaA, prtF2, sfb1, sof</i>      | + | - | - | - | - | - | C,G,H,I       | 9  | -                                     | 51  | 183156 | 274078 | 1857207 |
| SAMN07154237 | 20162060 | GA | 73   | 331 | 13 | + | <i>mrp</i>      | <i>fbaA, prtF2, sfb1, sof</i>      | + | - | - | - | - | - | G,H,I,Z       | 9  | -                                     | 19  | 277299 | 374711 | 1779799 |
| SAMN07152970 | 20151647 | GA | 75   | 49  | 25 | + | <i>enn, mrp</i> | <i>fbaA, sof</i>                   | + | - | - | - | - | + | C,G,H,I,L,M,Z | 7  | -                                     | 81  | 49340  | 144529 | 1774667 |
| SAMN07153097 | 20153089 | TN | 75   | 49  | 25 | + | <i>enn, mrp</i> | <i>fbaA, sfb1, sof</i>             | + | - | - | - | - | + | C,G,H,I,L,M,Z | 10 | -                                     | 25  | 198254 | 352033 | 1734607 |
| SAMN07153310 | 20154384 | OR | 75   | 49  | 25 | + | <i>enn, mrp</i> | <i>fbaA, sfb1, sof</i>             | + | - | - | - | - | + | C,G,H,L,M,Z   | 1  | <i>mef, msrD</i>                      | 41  | 147277 | 201849 | 1783272 |
| SAMN07153361 | 20154615 | TN | 75   | 49  | 25 | + | <i>enn, mrp</i> | <i>fbaA, sfb1, sof</i>             | + | - | - | - | - | + | C,G,H,I,L,M,Z | 1  | <i>mef, gyrA-S11F, msrD</i>           | 23  | 181913 | 352551 | 1774974 |
| SAMN07153598 | 20155609 | MD | 75   | 49  | 25 | + | <i>enn, mrp</i> | <i>fbaA, sfb1, sof</i>             | + | - | - | - | - | + | C,G,H,L,M,Z   | 1  | -                                     | 27  | 234871 | 372879 | 1734775 |
| SAMN07153605 | 20155617 | MD | 75   | 49  | 25 | + | <i>enn, mrp</i> | <i>fbaA, sfb1, sof</i>             | + | - | - | - | - | + | C,G,H,L,M,Z   | 1  | -                                     | 27  | 235072 | 353466 | 1734919 |
| SAMN07153621 | 20155633 | MD | 75   | 49  | 25 | + | <i>enn, mrp</i> | <i>fbaA, sfb1, sof</i>             | + | - | - | - | - | + | C,G,H,L,M,Z   | 1  | -                                     | 27  | 182417 | 352315 | 1735496 |
| SAMN07153873 | 20156797 | MD | 75   | 49  | 25 | + | <i>enn, mrp</i> | <i>fbaA, sfb1, sof</i>             | + | - | - | - | - | + | C,G,H,L,M,Z   | 1  | -                                     | 42  | 164734 | 220128 | 1735238 |
| SAMN07153882 | 20160008 | CO | 75   | 49  | 25 | + | <i>enn, mrp</i> | <i>fbaA, sfb1, sof</i>             | + | - | - | - | - | + | C,G,H,I,L,M,Z | 10 | -                                     | 22  | 193234 | 351104 | 1734948 |
| SAMN07154006 | 20160752 | MD | 75   | 49  | 25 | + | <i>enn, mrp</i> | <i>fbaA, sfb1, sof</i>             | + | - | - | - | - | + | C,G,H,L,M,Z   | 1  | -                                     | 28  | 188126 | 503770 | 1737998 |
| SAMN07154008 | 20160754 | MD | 75   | 49  | 25 | + | <i>enn, mrp</i> | <i>fbaA, sof</i>                   | + | - | - | - | - | + | C,G,H,L,M,Z   | 1  | -                                     | 25  | 212825 | 503787 | 1737116 |
| SAMN07154009 | 20160755 | MD | 75   | 49  | 25 | + | <i>enn, mrp</i> | <i>fbaA, sfb1, sof</i>             | + | - | - | - | - | + | C,G,H,I,L,M,Z | 10 | -                                     | 24  | 198075 | 352145 | 1731349 |
| SAMN07153061 | 20152790 | GA | 75   | 150 | 25 | + | <i>enn, mrp</i> | <i>fbaA, sfb1, sof</i>             | + | - | - | - | + | + | C,G,L,M,Z     | 1  | -                                     | 31  | 105369 | 292512 | 1873386 |
| SAMN07153141 | 20153537 | OR | 75   | 150 | 25 | + | <i>enn, mrp</i> | <i>fbaA, sfb1, sof</i>             | + | - | - | - | + | + | G,K,L,M,Z     | 1  | -                                     | 24  | 181908 | 356280 | 1824851 |
| SAMN07153373 | 20154628 | GA | 75   | 150 | 25 | + | <i>enn, mrp</i> | <i>fbaA, sfb1, sof</i>             | + | - | - | - | + | + | C,G,L,M,Z     | 1  | -                                     | 34  | 109979 | 287424 | 1871900 |
| SAMN07153580 | 20155588 | TN | 75   | 150 | 25 | + | <i>enn, mrp</i> | <i>fbaA, sfb1, sof</i>             | + | - | - | - | + | + | G,L,M,Z       | 1  | -                                     | 31  | 127244 | 394526 | 1825507 |
| SAMN07153720 | 20156271 | OR | 75   | 150 | 25 | + | <i>enn, mrp</i> | <i>fbaA, sfb1, sof</i>             | + | - | - | - | + | + | G,K,L,M,Z     | 1  | -                                     | 17  | 245006 | 466444 | 1829882 |
| SAMN07153724 | 20156321 | GA | 75   | 150 | 25 | + | <i>enn, mrp</i> | <i>fbaA, sfb1, sof</i>             | + | - | - | - | + | + | C,G,K,L,M,Z   | 1  | <i>parC-S6F</i>                       | 27  | 149697 | 287361 | 1847680 |
| SAMN07153116 | 20153110 | NY | 75   | 851 | 25 | + | <i>enn, mrp</i> | <i>fbaA, sfb1, sof</i>             | + | - | - | - | - | + | C,G,H,I,L,M,Z | 1  | -                                     | 34  | 205916 | 317531 | 1767621 |
| SAMN07153581 | 20155589 | TN | 75   | 861 | 25 | + | <i>enn, mrp</i> | <i>fbaA, sfb1, sof</i>             | + | - | - | - | - | + | C,G,H,I,L,M,Z | 7  | <i>mef, msrD</i>                      | 54  | 61562  | 154796 | 1781115 |
| SAMN07152998 | 20152300 | OR | 76   | 50  | -  | + | <i>enn, mrp</i> | <i>fbaA, sfb1, sof</i>             | + | - | - | - | - | + | G,J,Z         | 1  | <i>tetM, ant6-la, aph3-III, sat4A</i> | 101 | 38203  | 133920 | 1852297 |

|              |          |    |      |     |    |   |                 |                                    |   |   |   |   |   |   |           |   |                                       |    |        |        |         |
|--------------|----------|----|------|-----|----|---|-----------------|------------------------------------|---|---|---|---|---|---|-----------|---|---------------------------------------|----|--------|--------|---------|
| SAMN07153115 | 20153109 | NY | 76   | 50  | 12 | + | <i>enn, mrp</i> | <i>fbaA, prtF2, sfb1, sof</i>      | + | - | - | - | + | + | G,H,I     | 1 | <i>ermB, tetM</i>                     | 47 | 129119 | 287679 | 1870736 |
| SAMN07153220 | 20154030 | CA | 76   | 50  | -  | + | <i>enn, mrp</i> | <i>fbaA, sfb1, sof</i>             | + | - | - | - | - | + | G,J,Z     | 1 | <i>tetM, ant6-la, aph3-III, sat4A</i> | 39 | 190381 | 299922 | 1836318 |
| SAMN07153507 | 20155209 | GA | 76   | 50  | -  | + | <i>enn, mrp</i> | <i>fbaA, sfb1, sof</i>             | + | - | - | - | - | + | G,J,L,M,Z | 1 | <i>tetM, ant6-la, aph3-III, sat4A</i> | 49 | 87181  | 174775 | 1924644 |
| SAMN07153627 | 20155639 | MD | 76   | 50  | 12 | + | <i>enn, mrp</i> | <i>fbaA, prtF2, sfb1, sof</i>      | + | - | - | - | + | + | G,H,I,Z   | 1 | <i>ermB, tetM</i>                     | 37 | 110955 | 243857 | 1866082 |
| SAMN07153668 | 20156107 | NM | 76   | 50  | -  | + | <i>enn, mrp</i> | <i>fbaA, sfb1, sof</i>             | + | - | - | - | - | + | G,J,Z     | 1 | <i>tetM, ant6-la, aph3-III, sat4A</i> | 26 | 283903 | 428894 | 1838673 |
| SAMN07153713 | 20156264 | OR | 76   | 50  | -  | + | <i>enn, mrp</i> | <i>fbaA, sfb1, sof</i>             | + | - | - | - | - | + | G,J,Z     | 1 | <i>tetM, ant6-la, aph3-III, sat4A</i> | 28 | 224622 | 432387 | 1840060 |
| SAMN07153717 | 20156268 | OR | 76   | 50  | -  | + | <i>enn, mrp</i> | <i>fbaA, sfb1, sof</i>             | + | - | - | - | - | + | C,G,J,Z   | 1 | <i>tetM, ant6-la, aph3-III, sat4A</i> | 37 | 165617 | 428904 | 1920923 |
| SAMN07153867 | 20156791 | MD | 76   | 50  | 12 | + | <i>enn, mrp</i> | <i>fbaA, prtF2, sfb1, sof</i>      | + | - | - | - | + | + | G,H,I,Z   | 4 | <i>ermB, tetM</i>                     | 55 | 191400 | 238924 | 1875348 |
| SAMN07153879 | 20160005 | CO | 76   | 50  | -  | + | <i>enn, mrp</i> | <i>fbaA, sfb1, sof</i>             | + | - | - | - | - | + | G,J,L,M,Z | 1 | <i>tetM, ant6-la, aph3-III, sat4A</i> | 35 | 230077 | 428308 | 1880391 |
| SAMN07153938 | 20160183 | GA | 76   | 50  | -  | + | <i>enn, mrp</i> | <i>fbaA, sfb1, sof</i>             | + | - | - | - | - | + | G,J,L,M,Z | 1 | <i>tetM, ant6-la, aph3-III, sat4A</i> | 39 | 133575 | 329975 | 1931155 |
| SAMN07154045 | 20160959 | OR | 76   | 50  | -  | + | <i>enn, mrp</i> | <i>fbaA, sfb1, sof</i>             | + | - | - | - | - | + | G,J,Z     | 1 | <i>tetM, ant6-la, aph3-III, sat4A</i> | 29 | 227133 | 428984 | 1839349 |
| SAMN07154085 | 20161079 | CO | 76   | 50  | -  | + | <i>enn, mrp</i> | <i>fbaA, sfb1, sof</i>             | + | - | - | - | - | + | G,J,L,M,Z | 1 | <i>tetM, ant6-la, aph3-III, sat4A</i> | 29 | 283952 | 428956 | 1882995 |
| SAMN07154353 | 20162653 | CO | 76   | 50  | -  | + | <i>enn, mrp</i> | <i>fbaA, sfb1, sof</i>             | + | - | - | - | - | + | G,J,L,M,Z | 1 | <i>tetM, ant6-la, aph3-III, sat4A</i> | 37 | 160935 | 428976 | 1889090 |
| SAMN07154404 | 20164912 | CO | 76   | 50  | 12 | + | <i>enn, mrp</i> | <i>fbaA, prtF2, sfb1, sof</i>      | + | - | - | - | + | + | G,H,I,Z   | 1 | <i>ermB, tetM</i>                     | 49 | 109732 | 243770 | 1871905 |
| SAMN07154417 | 20164925 | CO | 76   | 50  | -  | + | <i>enn, mrp</i> | <i>fbaA, sfb1, sof</i>             | + | - | - | - | - | + | G,J,L,M,Z | 1 | <i>tetM, ant6-la, aph3-III, sat4A</i> | 31 | 227176 | 428936 | 1884600 |
| SAMN07153307 | 20154381 | OR | 76.4 | 631 | -  | + | <i>enn, mrp</i> | <i>fbaA, sfb1, sof</i>             | + | - | - | - | - | + | G,H,K,Z   | 1 | -                                     | 59 | 68938  | 248464 | 1808643 |
| SAMN07154334 | 20162634 | CO | 76.4 | 631 | -  | + | <i>enn, mrp</i> | <i>fbaA, sfb1, sof</i>             | + | - | - | - | - | + | G,H,K,Z   | 1 | -                                     | 41 | 117736 | 248392 | 1808868 |
| SAMN07153269 | 20154151 | MN | 77   | 63  | 13 | + | <i>enn, mrp</i> | <i>fbaA, prtF2, R28, sfb1, sof</i> | + | + | - | - | - | - | Z         | 1 | <i>tetO</i>                           | 38 | 133767 | 230301 | 1889700 |
| SAMN07153009 | 20152512 | MN | 77   | 63  | 13 | + | <i>enn, mrp</i> | <i>fbaA, prtF2, sfb1, sof</i>      | + | + | - | - | - | - | A,Z       | 1 | -                                     | 92 | 34227  | 82760  | 1835470 |
| SAMN07153390 | 20154792 | CO | 77   | 63  | 13 | + | <i>mrp</i>      | <i>fbaA, prtF2, R28, sfb1, sof</i> | + | + | - | - | - | - | -         | 1 | <i>tetO</i>                           | 35 | 169652 | 266024 | 1898131 |
| SAMN07153442 | 20155018 | MN | 77   | 63  | 13 | + | <i>enn, mrp</i> | <i>fbaA, prtF2, R28, sfb1, sof</i> | + | + | - | - | - | - | C,Z       | 1 | <i>tetO</i>                           | 22 | 306122 | 466265 | 1906728 |
| SAMN07153452 | 20155030 | MN | 77   | 63  | 13 | + | <i>enn, mrp</i> | <i>fbaA, prtF2, R28, sfb1, sof</i> | + | + | - | - | - | - | C,Z       | 1 | <i>tetO</i>                           | 35 | 269289 | 778607 | 1903845 |
| SAMN07153457 | 20155035 | MN | 77   | 63  | 13 | + | <i>enn, mrp</i> | <i>fbaA, prtF2, R28, sfb1, sof</i> | + | + | - | - | - | - | Z         | 1 | <i>tetO</i>                           | 32 | 204047 | 277631 | 1867965 |
| SAMN07153486 | 20155065 | MN | 77   | 63  | 13 | + | <i>enn, mrp</i> | <i>fbaA, prtF2, R28, sfb1, sof</i> | + | + | - | - | - | - | C,Z       | 1 | <i>tetO</i>                           | 44 | 87984  | 179057 | 1910337 |
| SAMN07153628 | 20155640 | MD | 77   | 63  | 13 | + | <i>enn, mrp</i> | <i>fbaA, prtF2, R28, sfb1, sof</i> | + | - | - | - | - | - | C,Z       | 1 | <i>tetO</i>                           | 28 | 270075 | 778817 | 1865873 |
| SAMN07153629 | 20155641 | MD | 77   | 63  | 13 | + | <i>enn, mrp</i> | <i>fbaA, prtF2, R28, sfb1, sof</i> | + | - | - | - | - | - | C,Z       | 1 | <i>tetO</i>                           | 28 | 180735 | 397252 | 1867010 |
| SAMN07153685 | 20156164 | MN | 77   | 63  | 13 | + | <i>enn, mrp</i> | <i>fbaA, prtF2, R28, sfb1, sof</i> | + | + | - | - | - | - | Z         | 1 | <i>tetO</i>                           | 23 | 269579 | 772798 | 1903584 |
| SAMN07153692 | 20156171 | MN | 77   | 63  | 13 | + | <i>enn, mrp</i> | <i>fbaA, prtF2, R28, sfb1, sof</i> | + | + | - | - | - | - | Z         | 1 | <i>tetO</i>                           | 29 | 119444 | 266011 | 1865319 |
| SAMN07153735 | 20156388 | CA | 77   | 63  | 13 | + | <i>enn, mrp</i> | <i>fbaA, prtF2, sfb1, sof</i>      | + | - | - | - | - | - | Z         | 1 | -                                     | 18 | 180237 | 353796 | 1758323 |
| SAMN07153749 | 20156402 | CA | 77   | 63  | 13 | + | <i>enn, mrp</i> | <i>fbaA, prtF2, R28, sfb1, sof</i> | + | - | - | - | - | - | K,Z       | 1 | <i>tetO</i>                           | 45 | 134284 | 278673 | 1868656 |
| SAMN07153940 | 20160245 | OR | 77   | 63  | 13 | + | <i>enn, mrp</i> | <i>fbaA, prtF2, R28, sfb1, sof</i> | + | + | - | - | - | - | C,Z       | 1 | <i>tetO</i>                           | 41 | 110220 | 225356 | 1937232 |
| SAMN07154082 | 20161076 | CO | 77   | 63  | 13 | + | <i>enn, mrp</i> | <i>fbaA, prtF2, R28, sfb1, sof</i> | + | + | - | - | - | - | C,Z       | 1 | <i>tetO</i>                           | 27 | 200421 | 312714 | 1931893 |
| SAMN07154088 | 20161082 | CO | 77   | 63  | 13 | + | <i>enn, mrp</i> | <i>fbaA, prtF2, R28, sfb1, sof</i> | + | - | - | - | - | - | C,Z       | 1 | <i>tetO</i>                           | 19 | 305819 | 466270 | 1895810 |
| SAMN07154320 | 20162428 | MN | 77   | 63  | 13 | + | <i>enn, mrp</i> | <i>fbaA, prtF2, R28, sfb1, sof</i> | + | + | - | - | - | - | C,Z       | 1 | <i>tetO</i>                           | 24 | 241185 | 778858 | 1910798 |
| SAMN07153235 | 20154045 | CA | 77   | 63  | 13 | + | <i>enn, mrp</i> | <i>fbaA, prtF2, R28, sfb1, sof</i> | + | - | - | - | + | + | L,M,Z     | 1 | <i>ermTR, tetO</i>                    | 23 | 168719 | 466277 | 1933132 |
| SAMN07153328 | 20154558 | CT | 77   | 63  | 13 | + | <i>enn, mrp</i> | <i>fbaA, prtF2, R28, sfb1, sof</i> | + | - | - | - | + | + | K,Z       | 1 | <i>ermTR, tetO</i>                    | 74 | 86762  | 200411 | 1900749 |
| SAMN07153516 | 20155357 | CT | 77   | 63  | 13 | + | <i>enn, mrp</i> | <i>fbaA, prtF2, R28, sfb1, sof</i> | + | - | - | - | + | + | Z         | 1 | <i>ermTR, tetO</i>                    | 36 | 230715 | 466256 | 1895140 |
| SAMN07153570 | 20155578 | TN | 77   | 63  | 13 | + | <i>enn, mrp</i> | <i>fbaA, prtF2, R28, sfb1, sof</i> | + | - | - | - | + | + | L,M,Z     | 1 | <i>ermTR, tetO</i>                    | 37 | 130174 | 464981 | 1937106 |
| SAMN07153640 | 20155652 | MD | 77   | 63  | 13 | + | <i>enn, mrp</i> | <i>fbaA, prtF2, R28, sfb1, sof</i> | + | - | - | - | + | + | L,M,Z     | 1 | <i>ermTR, tetO</i>                    | 46 | 87910  | 212404 | 1977471 |
| SAMN07153655 | 20156017 | GA | 77   | 63  | 13 | + | <i>enn, mrp</i> | <i>fbaA, prtF2, R28, sfb1, sof</i> | + | - | - | - | + | + | K,Z       | 1 | <i>ermTR, tetO</i>                    | 26 | 133016 | 466250 | 1907936 |
| SAMN07153667 | 20156106 | NM | 77   | 63  | 13 | + | <i>enn, mrp</i> | <i>fbaA, prtF2, R28, sfb1, sof</i> | + | - | - | - | + | + | K,Z       | 1 | <i>ermTR, tetO</i>                    | 26 | 180774 | 483662 | 1898536 |
| SAMN07153812 | 20156624 | TN | 77   | 63  | 13 | + | <i>enn, mrp</i> | <i>fbaA, prtF2, R28, sfb1, sof</i> | + | - | - | - | + | + | K,Z       | 1 | <i>ermTR, tetO</i>                    | 30 | 163196 | 466263 | 1899354 |
| SAMN07153868 | 20156792 | MD | 77   | 63  | 13 | + | <i>enn, mrp</i> | <i>fbaA, prtF2, R28, sfb1, sof</i> | + | - | - | - | + | + | L,M,Z     | 1 | <i>ermTR, tetO</i>                    | 58 | 163109 | 466124 | 1984968 |
| SAMN07153898 | 20160025 | CO | 77   | 63  | 13 | + | <i>enn, mrp</i> | <i>fbaA, prtF2, R28, sfb1, sof</i> | + | - | - | - | + | + | K,Z       | 1 | <i>ermTR, tetO</i>                    | 23 | 200454 | 283493 | 1904071 |
| SAMN07153927 | 20160171 | GA | 77   | 63  | 13 | + | <i>enn, mrp</i> | <i>fbaA, prtF2, R28, sfb1, sof</i> | + | - | - | - | + | + | K,Z       | 1 | <i>ermTR, tetO</i>                    | 46 | 87687  | 254082 | 1906486 |

|              |          |    |      |     |    |   |                 |                                    |   |   |   |   |   |   |           |   |                                    |     |        |        |         |
|--------------|----------|----|------|-----|----|---|-----------------|------------------------------------|---|---|---|---|---|---|-----------|---|------------------------------------|-----|--------|--------|---------|
| SAMN07153965 | 20160322 | MN | 77   | 63  | 13 | + | <i>enn, mrp</i> | <i>fbaA, prtF2, R28, sfb1, sof</i> | + | - | - | - | + | + | L,M,Z     | 1 | <i>ermTR, tetO</i>                 | 28  | 168339 | 466250 | 1935981 |
| SAMN07154004 | 20160750 | MD | 77   | 63  | 13 | + | <i>enn, mrp</i> | <i>fbaA, prtF2, R28, sfb1, sof</i> | + | - | - | - | + | + | L,M,Z     | 1 | <i>ermTR, tetO</i>                 | 38  | 163229 | 466294 | 1974297 |
| SAMN07154113 | 20161205 | OR | 77   | 63  | 13 | + | <i>enn, mrp</i> | <i>fbaA, prtF2, R28, sfb1, sof</i> | + | - | - | - | + | + | L,M,Z     | 1 | <i>ermTR, tetO</i>                 | 47  | 119284 | 466238 | 1967021 |
| SAMN07154187 | 20161721 | MD | 77   | 63  | 13 | + | <i>enn, mrp</i> | <i>fbaA, prtF2, R28, sfb1, sof</i> | + | - | - | - | + | + | L,M,Z     | 1 | <i>ermTR, tetO</i>                 | 121 | 39506  | 100138 | 1984951 |
| SAMN07154190 | 20161724 | MD | 77   | 63  | 13 | + | <i>enn, mrp</i> | <i>fbaA, prtF2, R28, sfb1, sof</i> | + | - | - | - | + | + | L,M,Z     | 1 | <i>ermTR, tetO</i>                 | 46  | 82351  | 208063 | 1978207 |
| SAMN07154218 | 20161838 | OR | 77   | 63  | 13 | + | <i>enn, mrp</i> | <i>fbaA, prtF2, R28, sfb1, sof</i> | + | - | - | - | + | + | L,M,Z     | 1 | <i>ermTR, tetO</i>                 | 95  | 58847  | 227581 | 1974414 |
| SAMN07154254 | 20162121 | CA | 77   | 63  | 13 | + | <i>enn, mrp</i> | <i>fbaA, prtF2, R28, sfb1, sof</i> | + | - | - | - | + | + | L,M,Z     | 1 | <i>ermTR, tetO</i>                 | 31  | 168765 | 503635 | 1974542 |
| SAMN07153145 | 20153541 | OR | 77   | 399 | -  | + | <i>enn, mrp</i> | <i>fbaA, prtF2, sof</i>            | + | - | - | - | - | + | G,Z       | 1 | <i>ermT, tetM</i>                  | 38  | 121859 | 243709 | 1746642 |
| SAMN07153148 | 20153553 | GA | 77   | 399 | -  | + | <i>enn, mrp</i> | <i>fbaA, prtF2, sof</i>            | + | - | - | - | - | + | G,Z       | 1 | <i>ermT, tetM</i>                  | 50  | 64367  | 200068 | 1756808 |
| SAMN07153359 | 20154612 | TN | 77   | 399 | -  | + | <i>enn, mrp</i> | <i>fbaA, prtF2, sof</i>            | + | - | - | - | - | + | G,Z       | 1 | <i>ermT, tetM</i>                  | 36  | 125728 | 230756 | 1757678 |
| SAMN07153652 | 20156012 | GA | 77   | 399 | -  | + | <i>enn, mrp</i> | <i>fbaA, prtF2, sof</i>            | + | - | - | - | - | + | G,Z       | 1 | <i>ermT, tetM</i>                  | 38  | 125644 | 243633 | 1749212 |
| SAMN07153726 | 20156324 | GA | 77   | 399 | -  | + | <i>enn, mrp</i> | <i>fbaA, prtF2, sof</i>            | + | - | - | - | - | + | G,Z       | 1 | <i>ermT, tetM</i>                  | 45  | 76973  | 243733 | 1759383 |
| SAMN07153733 | 20156364 | NM | 77   | 399 | -  | + | <i>enn, mrp</i> | <i>fbaA, prtF2, sof</i>            | + | - | - | - | - | + | C,G,H,I,Z | 1 | <i>ermB, tetM, aph3-III, sat4A</i> | 48  | 116425 | 188105 | 1971408 |
| SAMN07153786 | 20156442 | CA | 77   | 399 | -  | + | <i>enn, mrp</i> | <i>fbaA, prtF2, sfb1, sof</i>      | + | - | - | - | - | + | G,K,L,Z   | 1 | <i>tetM</i>                        | 31  | 117796 | 260654 | 1764621 |
| SAMN07153820 | 20156633 | TN | 77   | 399 | -  | + | <i>enn, mrp</i> | <i>fbaA, prtF2, sof</i>            | + | - | - | - | - | + | G,H,I,Z   | 1 | <i>ermB, tetM, aph3-III, sat4A</i> | 30  | 123945 | 337125 | 1942713 |
| SAMN07154081 | 20161075 | CO | 77   | 399 | -  | + | <i>enn, mrp</i> | <i>fbaA, prtF2, sof</i>            | + | - | - | - | - | + | G,Z       | 1 | <i>ermT</i>                        | 37  | 126792 | 243689 | 1735952 |
| SAMN07154123 | 20161238 | NY | 77   | 399 | -  | + | <i>enn, mrp</i> | <i>fbaA, prtF2, sof</i>            | + | - | - | - | - | + | G,Z       | 1 | <i>tetM</i>                        | 34  | 149347 | 229802 | 1835227 |
| SAMN07154188 | 20161722 | MD | 77   | 399 | -  | + | <i>enn, mrp</i> | <i>fbaA, prtF2, sfb1, sof</i>      | + | - | - | - | - | + | G,J,L,M,Z | 1 | <i>ermT, tetM</i>                  | 93  | 54057  | 166541 | 1809550 |
| SAMN07154039 | 20160953 | CT | 77   | 904 | -  | + | <i>enn, mrp</i> | <i>fbaA, sfb1, sof</i>             | + | - | - | - | - | - | G,Z       | 1 | <i>tetM</i>                        | 22  | 216219 | 463337 | 1759685 |
| SAMN07153571 | 20155579 | TN | 77.4 | 133 | 5  | + | <i>enn, mrp</i> | <i>fbaA, prtF2, sfb1, sof</i>      | + | - | - | - | - | - | G,M,Z     | 1 | <i>tetM</i>                        | 28  | 156500 | 245792 | 1786145 |
| SAMN07153572 | 20155580 | TN | 77.4 | 133 | 5  | + | <i>enn, mrp</i> | <i>fbaA, prtF2, sfb1, sof</i>      | + | - | - | - | - | - | G,M,Z     | 1 | <i>tetM</i>                        | 31  | 118844 | 230876 | 1781464 |
| SAMN07153577 | 20155585 | TN | 77.4 | 133 | 5  | + | <i>enn, mrp</i> | <i>fbaA, prtF2, sfb1, sof</i>      | + | - | - | - | - | - | G,M,Z     | 1 | <i>tetM</i>                        | 34  | 178621 | 245744 | 1780935 |
| SAMN07154225 | 20161863 | TN | 77.4 | 133 | 5  | + | <i>enn, mrp</i> | <i>fbaA, prtF2, sfb1, sof</i>      | + | - | - | - | - | - | G,M,Z     | 1 | <i>tetM</i>                        | 24  | 178994 | 309027 | 1780204 |
| SAMN07154226 | 20161864 | TN | 77.4 | 133 | 5  | + | <i>enn, mrp</i> | <i>fbaA, prtF2, sfb1, sof</i>      | + | - | - | - | - | - | G,M,Z     | 1 | <i>tetM</i>                        | 25  | 181389 | 309019 | 1780497 |
| SAMN07154233 | 20161872 | TN | 77.4 | 133 | 5  | + | <i>enn, mrp</i> | <i>fbaA, prtF2, sfb1, sof</i>      | + | - | - | - | - | - | G,M,Z     | 1 | <i>tetM</i>                        | 28  | 243078 | 390581 | 1775634 |
| SAMN07154424 | 20165973 | TN | 77.4 | 133 | 5  | + | <i>enn, mrp</i> | <i>fbaA, prtF2, sfb1, sof</i>      | + | - | - | - | - | - | G,M,Z     | 1 | <i>tetM, parC-D10G</i>             | 44  | 173307 | 243078 | 1785783 |
| SAMN07154324 | 20162594 | NM | 80.1 | 8   | -  | + | <i>enn, mrp</i> | <i>fbaA, prtF2</i>                 | + | - | - | - | - | - | A,G,K,Z   | 1 | -                                  | 26  | 150127 | 264813 | 1822479 |
| SAMN07153144 | 20153540 | OR | 81   | 624 | 89 | + | <i>enn, mrp</i> | <i>fbaA, prtF2, sof</i>            | + | + | - | - | + | + | G,H,I     | 8 | -                                  | 56  | 67560  | 173170 | 1847460 |
| SAMN07153212 | 20154021 | CA | 81   | 624 | 89 | + | <i>enn, mrp</i> | <i>fbaA, prtF2, sof</i>            | + | - | - | - | + | + | G,H       | 8 | -                                  | 36  | 115005 | 207721 | 1820033 |
| SAMN07153380 | 20154679 | NM | 81   | 624 | 89 | + | <i>enn, mrp</i> | <i>fbaA, prtF2, sof</i>            | + | - | - | - | + | + | G,H,L,M   | 8 | -                                  | 57  | 94828  | 207949 | 1876545 |
| SAMN07153403 | 20154805 | CO | 81   | 624 | 89 | + | <i>enn, mrp</i> | <i>fbaA, prtF2, sof</i>            | + | - | - | - | + | + | G,H       | 8 | -                                  | 62  | 86178  | 176808 | 1798543 |
| SAMN07153497 | 20155197 | GA | 81   | 624 | 89 | + | <i>enn, mrp</i> | <i>fbaA, prtF2, sof</i>            | + | - | - | - | + | + | G,H       | 8 | -                                  | 50  | 148752 | 207549 | 1763283 |
| SAMN07153641 | 20155653 | MD | 81   | 624 | 89 | + | <i>enn, mrp</i> | <i>fbaA, prtF2, sof</i>            | + | - | - | - | + | + | G,H,L,M   | 8 | -                                  | 49  | 94864  | 176519 | 1800233 |
| SAMN07153833 | 20156708 | CT | 81   | 624 | 89 | + | <i>enn, mrp</i> | <i>fbaA, prtF2, sof</i>            | + | - | - | - | + | + | G,H       | 8 | -                                  | 34  | 121169 | 207713 | 1819732 |
| SAMN07153850 | 20156727 | CT | 81   | 624 | 89 | + | <i>enn, mrp</i> | <i>fbaA, prtF2, sof</i>            | + | - | - | - | + | + | G,H       | 8 | -                                  | 42  | 99606  | 207677 | 1825101 |
| SAMN07153997 | 20160501 | NM | 81   | 624 | 89 | + | <i>enn, mrp</i> | <i>fbaA, prtF2, sof</i>            | + | - | - | - | + | + | G,H,L,M   | 8 | -                                  | 47  | 94849  | 207937 | 1798894 |
| SAMN07154069 | 20161027 | NM | 81   | 624 | 89 | + | <i>enn, mrp</i> | <i>fbaA, prtF2, sof</i>            | + | - | - | - | + | + | G,H       | 8 | -                                  | 43  | 94859  | 207700 | 1767146 |
| SAMN07154107 | 20161199 | OR | 81   | 624 | 89 | + | <i>enn, mrp</i> | <i>fbaA, prtF2, sof</i>            | + | - | - | - | + | + | G,H       | 8 | -                                  | 36  | 115001 | 207968 | 1807264 |
| SAMN07154157 | 20161441 | MN | 81   | 624 | 89 | + | <i>enn, mrp</i> | <i>fbaA, prtF2, sof</i>            | + | - | - | - | + | + | C,G,H,L,M | 8 | -                                  | 54  | 103170 | 208184 | 1891120 |
| SAMN07154209 | 20161829 | OR | 81   | 624 | 89 | + | <i>mrp</i>      | <i>fbaA, prtF2, sof</i>            | + | + | - | - | + | + | G,H,J     | 8 | -                                  | 159 | 28260  | 92165  | 1783630 |
| SAMN07154397 | 20163531 | NM | 81   | 624 | 89 | + | <i>enn, mrp</i> | <i>fbaA, prtF2, sof</i>            | + | + | - | - | + | + | G,H       | 8 | -                                  | 72  | 63757  | 207609 | 1837936 |
| SAMN07153084 | 20152992 | CT | 81   | 837 | 89 | + | <i>mrp</i>      | <i>fbaA, prtF2, sof</i>            | + | - | - | - | + | + | G,H,L,M   | 8 | -                                  | 47  | 81196  | 207941 | 1807448 |
| SAMN07153071 | 20152839 | GA | 81   | 837 | 89 | + | <i>mrp</i>      | <i>fbaA, prtF2, sof</i>            | + | - | - | - | + | + | G,H,L,M   | 8 | -                                  | 38  | 94869  | 207940 | 1813784 |
| SAMN07153515 | 20155356 | CT | 81   | 837 | 89 | + | <i>mrp</i>      | <i>fbaA, prtF2, sof</i>            | + | - | - | - | + | + | G,H,L,M   | 8 | -                                  | 36  | 114949 | 207917 | 1805714 |
| SAMN07153540 | 20155381 | CT | 81   | 837 | 89 | + | <i>mrp</i>      | <i>fbaA, prtF2, sof</i>            | + | - | - | - | + | + | G,H,L,M   | 8 | -                                  | 35  | 103184 | 207929 | 1812818 |

|              |          |    |      |     |    |   |                 |                               |   |   |   |   |   |   |             |   |                  |     |        |        |         |
|--------------|----------|----|------|-----|----|---|-----------------|-------------------------------|---|---|---|---|---|---|-------------|---|------------------|-----|--------|--------|---------|
| SAMN07153675 | 20156154 | NY | 81   | 837 | 89 | + | <i>mrp</i>      | <i>fbaA, prtF2, sof</i>       | + | - | - | - | + | + | G,H,L,M     | 8 | -                | 32  | 114957 | 221606 | 1806979 |
| SAMN07153774 | 20156430 | CA | 81   | 837 | 89 | + | <i>mrp</i>      | <i>fbaA, prtF2, sof</i>       | + | - | - | - | + | + | G,H,L,M     | 8 | -                | 41  | 114893 | 221541 | 1806402 |
| SAMN07154224 | 20161862 | TN | 81   | 837 | 89 | + | <i>mrp</i>      | <i>fbaA, prtF2, sof</i>       | + | - | - | - | + | + | G,H         | 8 | -                | 39  | 119895 | 207913 | 1762466 |
| SAMN07154271 | 20162138 | CA | 81   | 837 | 89 | + | <i>mrp</i>      | <i>fbaA, prtF2, sof</i>       | + | - | - | - | + | + | G,H,L,M     | 8 | -                | 103 | 87862  | 207349 | 1802201 |
| SAMN07154311 | 20162419 | MN | 81   | 837 | 89 | + | <i>mrp</i>      | <i>fbaA, prtF2, sof</i>       | + | - | - | - | + | + | G,H         | 8 | -                | 38  | 125137 | 207905 | 1810617 |
| SAMN07154315 | 20162423 | MN | 81   | 909 | 89 | + | <i>enn, mrp</i> | <i>fbaA, prtF2, sof</i>       | + | - | - | - | - | + | G,H         | 8 | -                | 63  | 113975 | 213386 | 1868327 |
| SAMN07154251 | 20162118 | CA | 81.1 | 903 | 6  | + | <i>enn, mrp</i> | <i>fbaA, sfb1, sof</i>        | + | - | - | - | - | - | G,J,Z       | 1 | -                | 37  | 162062 | 869483 | 1796864 |
| SAMN07154080 | 20161074 | CO | 81.2 | 901 | 81 | + | <i>enn, mrp</i> | <i>fbaA, prtF2, sfb1, sof</i> | + | - | - | - | - | - | G,Z         | 1 | -                | 26  | 202211 | 315672 | 1823910 |
| SAMN07153241 | 20154051 | CA | 82   | 36  | 12 | + | <i>mrp</i>      | <i>fbaA, prtF2, sfb1, sof</i> | + | + | - | - | + | + | A,C,G,H,I,Z | 1 | -                | 51  | 148351 | 223783 | 1903311 |
| SAMN07153662 | 20156101 | NM | 82   | 334 | 5  | + | <i>enn, mrp</i> | <i>fbaA, prtF2, sfb1, sof</i> | + | - | - | - | - | - | C,G,H,I,Z   | 1 | -                | 49  | 78054  | 183738 | 1797889 |
| SAMN07154259 | 20162126 | CA | 82   | 334 | 5  | + | <i>enn, mrp</i> | <i>fbaA, prtF2, sfb1, sof</i> | + | - | - | - | - | - | C,G,H,I     | 1 | -                | 49  | 109455 | 198903 | 1855571 |
| SAMN07154279 | 20162147 | CA | 82   | 334 | 5  | + | <i>enn, mrp</i> | <i>fbaA, prtF2, sfb1, sof</i> | + | - | - | - | - | - | C,G,H,I,Z   | 1 | -                | 38  | 151123 | 237797 | 1796708 |
| SAMN07154379 | 20163032 | TN | 82   | 334 | 5  | + | <i>enn, mrp</i> | <i>fbaA, prtF2, sfb1, sof</i> | + | - | - | - | - | - | C,G,H,I,Z   | 1 | -                | 44  | 80802  | 177141 | 1795496 |
| SAMN07154380 | 20163033 | TN | 82   | 334 | 5  | + | <i>enn, mrp</i> | <i>fbaA, prtF2, sfb1, sof</i> | + | - | - | - | - | - | C,G,H,I,Z   | 1 | -                | 52  | 80844  | 190171 | 1797096 |
| SAMN07153028 | 20152736 | NM | 82   | 334 | 5  | + | <i>enn, mrp</i> | <i>fbaA, prtF2, sfb1, sof</i> | + | - | - | - | - | - | C,G,H,I,Z   | 1 | -                | 37  | 119673 | 235774 | 1802464 |
| SAMN07153167 | 20153582 | NM | 82   | 334 | 5  | + | <i>enn, mrp</i> | <i>fbaA, prtF2, sfb1, sof</i> | + | - | - | - | - | - | C,G,H,I,Z   | 1 | -                | 34  | 222954 | 237828 | 1795856 |
| SAMN07153171 | 20153599 | CO | 82   | 334 | 5  | + | <i>enn, mrp</i> | <i>fbaA, prtF2, sfb1, sof</i> | + | - | - | - | - | - | C,G,H,I,Z   | 1 | -                | 40  | 97061  | 237801 | 1798538 |
| SAMN07153174 | 20153603 | CO | 82   | 334 | 5  | + | <i>enn, mrp</i> | <i>fbaA, prtF2, sfb1, sof</i> | + | - | - | - | - | - | C,G,H,I,Z   | 1 | -                | 39  | 101859 | 235806 | 1798106 |
| SAMN07153179 | 20153608 | CO | 82   | 334 | 5  | + | <i>enn, mrp</i> | <i>fbaA, prtF2, sfb1, sof</i> | + | - | - | - | - | - | C,G,H,I,Z   | 1 | -                | 30  | 151450 | 237848 | 1795123 |
| SAMN07153189 | 20153618 | CO | 82   | 334 | 5  | + | <i>enn, mrp</i> | <i>fbaA, prtF2, sfb1, sof</i> | + | - | - | - | - | - | C,G,H,I,Z   | 1 | -                | 33  | 122858 | 235778 | 1796057 |
| SAMN07153199 | 20154006 | CA | 82   | 334 | 5  | + | <i>enn, mrp</i> | <i>fbaA, prtF2, sfb1, sof</i> | + | - | - | - | - | - | C,G,H,I,Z   | 1 | -                | 33  | 151139 | 238034 | 1796681 |
| SAMN07153204 | 20154013 | CA | 82   | 334 | 5  | + | <i>enn, mrp</i> | <i>fbaA, prtF2, sfb1, sof</i> | + | - | - | - | - | - | C,G,H,I,Z   | 1 | -                | 31  | 160161 | 232592 | 1795731 |
| SAMN07153210 | 20154019 | CA | 82   | 334 | 5  | + | <i>enn, mrp</i> | <i>fbaA, prtF2, sfb1, sof</i> | + | - | - | - | - | - | C,G,H,I,Z   | 1 | -                | 33  | 148624 | 238130 | 1796690 |
| SAMN07153213 | 20154022 | CA | 82   | 334 | 5  | + | <i>enn, mrp</i> | <i>fbaA, prtF2, sfb1, sof</i> | + | - | - | - | - | - | C,G,H,I,Z   | 1 | -                | 34  | 122853 | 236332 | 1797609 |
| SAMN07153214 | 20154023 | CA | 82   | 334 | 5  | + | <i>enn, mrp</i> | <i>fbaA, prtF2, sfb1, sof</i> | + | - | - | - | - | - | C,G,H,I,Z   | 1 | -                | 37  | 132855 | 238094 | 1797558 |
| SAMN07153219 | 20154029 | CA | 82   | 334 | 5  | + | <i>enn, mrp</i> | <i>fbaA, prtF2, sof</i>       | + | - | - | - | - | - | C,G,H,I,Z   | 1 | -                | 33  | 151119 | 235396 | 1796910 |
| SAMN07153222 | 20154032 | CA | 82   | 334 | 5  | + | <i>enn, mrp</i> | <i>fbaA, prtF2, sfb1, sof</i> | + | - | - | - | - | - | C,G,H,I,Z   | 1 | -                | 36  | 88227  | 237896 | 1797991 |
| SAMN07153227 | 20154037 | CA | 82   | 334 | 5  | + | <i>enn, mrp</i> | <i>fbaA, prtF2, sfb1, sof</i> | + | - | - | - | - | - | C,G,H,I,Z   | 1 | -                | 37  | 151137 | 236296 | 1798745 |
| SAMN07153229 | 20154039 | CA | 82   | 334 | 5  | + | <i>enn, mrp</i> | <i>fbaA, prtF2, sfb1, sof</i> | + | - | - | - | - | - | C,G,H,I,Z   | 1 | <i>parC-D10N</i> | 35  | 163140 | 240961 | 1796627 |
| SAMN07153230 | 20154040 | CA | 82   | 334 | 5  | + | <i>enn, mrp</i> | <i>fbaA, prtF2, sfb1, sof</i> | + | - | - | - | - | - | C,G,H,I,Z   | 1 | -                | 38  | 151074 | 238048 | 1796121 |
| SAMN07153231 | 20154041 | CA | 82   | 334 | 5  | + | <i>enn, mrp</i> | <i>fbaA, prtF2, sfb1, sof</i> | + | - | - | - | - | - | C,G,H,I,Z   | 1 | -                | 42  | 151090 | 238026 | 1799279 |
| SAMN07153240 | 20154050 | CA | 82   | 334 | 5  | + | <i>enn, mrp</i> | <i>fbaA, prtF2, sfb1, sof</i> | + | - | - | - | - | - | C,G,H,I,Z   | 1 | -                | 40  | 222790 | 240358 | 1792623 |
| SAMN07153293 | 20154294 | NM | 82   | 334 | 5  | + | <i>enn, mrp</i> | <i>fbaA, prtF2, sfb1, sof</i> | + | - | - | - | - | - | C,G,H,I,Z   | 1 | -                | 30  | 137110 | 238189 | 1794663 |
| SAMN07153311 | 20154385 | OR | 82   | 334 | 5  | + | <i>enn, mrp</i> | <i>fbaA, prtF2, sfb1, sof</i> | + | - | - | - | - | - | C,G,H,I,Z   | 1 | -                | 41  | 163046 | 240728 | 1795339 |
| SAMN07153340 | 20154593 | TN | 82   | 334 | 5  | + | <i>enn, mrp</i> | <i>fbaA, prtF2, sfb1, sof</i> | + | - | - | - | - | - | C,G,H,I,Z   | 1 | -                | 35  | 125640 | 238184 | 1795923 |
| SAMN07153355 | 20154608 | TN | 82   | 334 | 5  | + | <i>enn, mrp</i> | <i>fbaA, prtF2, sfb1, sof</i> | + | - | - | - | - | - | C,G,H,I,Z   | 1 | -                | 29  | 132526 | 237618 | 1795642 |
| SAMN07153356 | 20154609 | TN | 82   | 334 | 5  | + | <i>enn, mrp</i> | <i>fbaA, prtF2, sfb1, sof</i> | + | - | - | - | - | - | C,G,H,I,Z   | 1 | -                | 34  | 222974 | 238298 | 1797281 |
| SAMN07153384 | 20154786 | CO | 82   | 334 | 5  | + | <i>enn, mrp</i> | <i>fbaA, prtF2, sfb1, sof</i> | + | - | - | - | - | - | C,G,H,I,Z   | 1 | -                | 44  | 151360 | 240940 | 1797537 |
| SAMN07153392 | 20154794 | CO | 82   | 334 | 5  | + | <i>enn, mrp</i> | <i>fbaA, prtF2, sfb1, sof</i> | + | - | - | - | - | - | C,G,H,I,Z   | 1 | -                | 34  | 151109 | 235364 | 1795685 |
| SAMN07153400 | 20154802 | CO | 82   | 334 | 5  | + | <i>enn, mrp</i> | <i>fbaA, prtF2, sfb1, sof</i> | + | - | - | - | - | - | C,G,H,I,Z   | 1 | -                | 39  | 154082 | 235224 | 1794065 |
| SAMN07153411 | 20154815 | CO | 82   | 334 | 5  | + | <i>enn, mrp</i> | <i>fbaA, prtF2, sfb1, sof</i> | + | - | - | - | - | - | C,G,H,I,Z   | 1 | -                | 38  | 112324 | 232728 | 1798343 |
| SAMN07153412 | 20154816 | CO | 82   | 334 | 5  | + | <i>enn, mrp</i> | <i>fbaA, prtF2, sfb1, sof</i> | + | - | - | - | - | - | C,G,H,I,Z   | 1 | -                | 34  | 112395 | 232685 | 1797184 |
| SAMN07153413 | 20154817 | CO | 82   | 334 | 5  | + | <i>enn, mrp</i> | <i>fbaA, prtF2, sfb1, sof</i> | + | - | - | - | - | - | C,G,H,I,Z   | 1 | -                | 34  | 132405 | 238056 | 1796432 |
| SAMN07153418 | 20154822 | CO | 82   | 334 | 5  | + | <i>enn, mrp</i> | <i>fbaA, prtF2, sfb1, sof</i> | + | - | - | - | - | - | C,G,H,I,Z   | 1 | -                | 36  | 151154 | 238158 | 1795416 |
| SAMN07153575 | 20155583 | TN | 82   | 334 | 5  | + | <i>enn, mrp</i> | <i>fbaA, prtF2, sfb1, sof</i> | + | - | - | - | - | - | C,G,H,I,Z   | 1 | -                | 47  | 73526  | 223058 | 1798819 |

|              |          |    |    |     |   |   |                                        |   |   |   |   |   |   |               |   |              |     |        |        |         |
|--------------|----------|----|----|-----|---|---|----------------------------------------|---|---|---|---|---|---|---------------|---|--------------|-----|--------|--------|---------|
| SAMN07153584 | 20155592 | TN | 82 | 334 | 5 | + | <i>enn, mrp fbaA, prtF2, sfb1, sof</i> | + | - | - | - | - | - | C,G,H,I,L,M,Z | 1 | -            | 49  | 122858 | 238130 | 1871392 |
| SAMN07153665 | 20156104 | NM | 82 | 334 | 5 | + | <i>enn, mrp fbaA, prtF2, sfb1, sof</i> | + | - | - | - | - | - | C,G,H,I,Z     | 1 | -            | 34  | 151394 | 240967 | 1795215 |
| SAMN07153679 | 20156158 | NY | 82 | 334 | 5 | + | <i>enn, mrp fbaA, prtF2, sfb1, sof</i> | + | - | - | - | - | - | C,G,H,I,Z     | 1 | -            | 35  | 151448 | 238175 | 1793153 |
| SAMN07153716 | 20156267 | OR | 82 | 334 | 5 | + | <i>enn, mrp fbaA, prtF2, sfb1, sof</i> | + | - | - | - | - | - | C,G,H,I,Z     | 1 | -            | 34  | 151113 | 238178 | 1797710 |
| SAMN07153734 | 20156387 | CA | 82 | 334 | 5 | + | <i>enn, mrp fbaA, prtF2, sfb1, sof</i> | + | - | - | - | - | - | C,G,H,I,Z     | 1 | -            | 42  | 222834 | 238473 | 1795505 |
| SAMN07153739 | 20156392 | CA | 82 | 334 | 5 | + | <i>enn, mrp fbaA, prtF2, sfb1, sof</i> | + | - | - | - | - | - | C,G,H,I,Z     | 1 | -            | 36  | 207486 | 234408 | 1796815 |
| SAMN07153746 | 20156399 | CA | 82 | 334 | 5 | + | <i>enn, mrp fbaA, prtF2, sfb1, sof</i> | + | - | - | - | - | - | C,G,H,I,Z     | 1 | -            | 36  | 151093 | 235686 | 1797039 |
| SAMN07153752 | 20156406 | CA | 82 | 334 | 5 | + | <i>enn, mrp fbaA, prtF2, sfb1, sof</i> | + | - | - | - | - | - | C,G,H,I,Z     | 1 | -            | 36  | 151120 | 238242 | 1795927 |
| SAMN07153766 | 20156422 | CA | 82 | 334 | 5 | + | <i>enn, mrp fbaA, prtF2, sfb1, sof</i> | + | - | - | - | - | - | C,G,H,I,Z     | 1 | -            | 30  | 151145 | 235757 | 1796216 |
| SAMN07153773 | 20156429 | CA | 82 | 334 | 5 | + | <i>enn, mrp fbaA, prtF2, sfb1, sof</i> | + | - | - | - | - | - | C,G,H,I,Z     | 1 | <i>ermTR</i> | 41  | 163050 | 240737 | 1878465 |
| SAMN07153775 | 20156431 | CA | 82 | 334 | 5 | + | <i>enn, mrp fbaA, prtF2, sfb1, sof</i> | + | - | - | - | - | - | C,G,H,I,Z     | 1 | -            | 38  | 163106 | 240754 | 1797171 |
| SAMN07153780 | 20156436 | CA | 82 | 334 | 5 | + | <i>enn, mrp fbaA, prtF2, sfb1, sof</i> | + | - | - | - | - | - | C,G,H,I,Z     | 1 | -            | 68  | 58409  | 188289 | 1859361 |
| SAMN07153784 | 20156440 | CA | 82 | 334 | 5 | + | <i>enn, mrp fbaA, prtF2, sfb1, sof</i> | + | - | - | - | - | - | C,G,H,I,Z     | 1 | -            | 40  | 130005 | 232924 | 1795124 |
| SAMN07153794 | 20156450 | CA | 82 | 334 | 5 | + | <i>enn, mrp fbaA, prtF2, sfb1, sof</i> | + | - | - | - | - | - | C,G,H,I,Z     | 1 | -            | 37  | 150985 | 240342 | 1791138 |
| SAMN07153798 | 20156454 | CA | 82 | 334 | 5 | + | <i>enn, mrp fbaA, prtF2, sfb1, sof</i> | + | - | - | - | - | - | C,G,H,I,Z     | 1 | -            | 30  | 151123 | 241013 | 1794705 |
| SAMN07153799 | 20156455 | CA | 82 | 334 | 5 | + | <i>enn, mrp fbaA, prtF2, sfb1, sof</i> | + | - | - | - | - | - | C,G,H,I,Z     | 1 | -            | 29  | 223010 | 241007 | 1796800 |
| SAMN07153800 | 20156456 | CA | 82 | 334 | 5 | + | <i>enn, mrp fbaA, prtF2, sfb1, sof</i> | + | - | - | - | - | - | C,G,H,I,Z     | 1 | -            | 36  | 222922 | 240904 | 1842488 |
| SAMN07153813 | 20156625 | TN | 82 | 334 | 5 | + | <i>enn, mrp fbaA, prtF2, sfb1, sof</i> | + | - | - | - | - | - | C,G,H,I,Z     | 1 | -            | 36  | 122846 | 235766 | 1797816 |
| SAMN07153818 | 20156631 | TN | 82 | 334 | 5 | + | <i>enn, mrp fbaA, prtF2, sfb1, sof</i> | + | - | - | - | - | - | C,G,H,I,Z     | 1 | -            | 68  | 136746 | 240131 | 1791051 |
| SAMN07153874 | 20156798 | MD | 82 | 334 | 5 | + | <i>enn, mrp fbaA, prtF2, sfb1, sof</i> | + | - | - | - | - | - | C,G,H,I,Z     | 1 | <i>tetM</i>  | 39  | 162993 | 240354 | 1811353 |
| SAMN07153884 | 20160011 | CO | 82 | 334 | 5 | + | <i>enn, mrp fbaA, prtF2, sfb1, sof</i> | + | - | - | - | - | - | C,G,H,I,Z     | 1 | -            | 32  | 220515 | 238182 | 1798094 |
| SAMN07153891 | 20160018 | CO | 82 | 334 | 5 | + | <i>enn, mrp fbaA, prtF2, sfb1, sof</i> | + | - | - | - | - | - | C,G,H,I,Z     | 1 | -            | 168 | 163014 | 240556 | 1824211 |
| SAMN07153897 | 20160024 | CO | 82 | 334 | 5 | + | <i>enn, mrp fbaA, prtF2, sfb1, sof</i> | + | - | - | - | - | - | C,G,H,I,Z     | 1 | -            | 33  | 222934 | 240945 | 1801564 |
| SAMN07153900 | 20160027 | CO | 82 | 334 | 5 | + | <i>enn, mrp fbaA, prtF2, sfb1, sof</i> | + | - | - | - | - | - | C,G,H,I,Z     | 1 | -            | 42  | 222866 | 240591 | 1800821 |
| SAMN07153906 | 20160034 | CO | 82 | 334 | 5 | + | <i>enn, mrp fbaA, prtF2, sfb1, sof</i> | + | - | - | - | - | - | C,G,H,I,Z     | 1 | -            | 29  | 151558 | 241080 | 1801700 |
| SAMN07153907 | 20160035 | CO | 82 | 334 | 5 | + | <i>enn, mrp fbaA, prtF2, sfb1, sof</i> | + | - | - | - | - | - | C,G,H,I,Z     | 1 | -            | 30  | 151457 | 238401 | 1802385 |
| SAMN07153908 | 20160036 | CO | 82 | 334 | 5 | + | <i>enn, mrp fbaA, prtF2, sfb1, sof</i> | + | - | - | - | - | - | C,G,H,I,Z     | 1 | -            | 33  | 163214 | 235396 | 1802011 |
| SAMN07153910 | 20160038 | CO | 82 | 334 | 5 | + | <i>enn, mrp fbaA, prtF2, sfb1, sof</i> | + | - | - | - | - | - | C,G,H,I,Z     | 1 | -            | 33  | 151465 | 238289 | 1802790 |
| SAMN07153911 | 20160040 | CO | 82 | 334 | 5 | + | <i>enn, mrp fbaA, prtF2, sfb1, sof</i> | + | - | - | - | - | - | C,G,H,I,Z     | 1 | -            | 29  | 222994 | 241022 | 1801470 |
| SAMN07153913 | 20160042 | CO | 82 | 334 | 5 | + | <i>enn, mrp fbaA, prtF2, sfb1, sof</i> | + | - | - | - | - | - | C,G,H,I,Z     | 1 | -            | 34  | 151103 | 240981 | 1801387 |
| SAMN07154017 | 20160927 | TN | 82 | 334 | 5 | + | <i>enn, mrp fbaA, prtF2, sfb1, sof</i> | + | - | - | - | - | - | C,G,H,I,Z     | 1 | -            | 31  | 151453 | 238243 | 1797147 |
| SAMN07154023 | 20160934 | TN | 82 | 334 | 5 | + | <i>enn, mrp fbaA, prtF2, sfb1, sof</i> | + | - | - | - | - | - | C,G,H,I,Z     | 1 | -            | 32  | 151187 | 241102 | 1796298 |
| SAMN07154026 | 20160939 | TN | 82 | 334 | 5 | + | <i>enn, mrp fbaA, prtF2, sfb1, sof</i> | + | - | - | - | - | - | C,G,H,I,Z     | 1 | -            | 31  | 151452 | 237880 | 1796403 |
| SAMN07154072 | 20161066 | CO | 82 | 334 | 5 | + | <i>enn, mrp fbaA, prtF2, sfb1, sof</i> | + | - | - | - | - | - | G,H,I,Z       | 1 | -            | 36  | 151431 | 238096 | 1762265 |
| SAMN07154075 | 20161069 | CO | 82 | 334 | 5 | + | <i>enn, mrp fbaA, prtF2, sfb1, sof</i> | + | - | - | - | - | - | C,G,H,I,Z     | 1 | -            | 46  | 137066 | 240874 | 1795452 |
| SAMN07154086 | 20161080 | CO | 82 | 334 | 5 | + | <i>enn, mrp fbaA, prtF2, sfb1, sof</i> | + | - | - | - | - | - | C,G,H,I,Z     | 1 | <i>tetM</i>  | 45  | 163106 | 322247 | 1884759 |
| SAMN07154095 | 20161089 | CO | 82 | 334 | 5 | + | <i>enn, mrp fbaA, prtF2, sfb1, sof</i> | + | - | - | - | - | - | C,G,H,I,Z     | 1 | -            | 34  | 151364 | 238111 | 1795967 |
| SAMN07154098 | 20161092 | CO | 82 | 334 | 5 | + | <i>enn, mrp fbaA, prtF2, sfb1, sof</i> | + | - | - | - | - | - | C,G,H,I,Z     | 1 | -            | 35  | 151406 | 240993 | 1796244 |
| SAMN07154228 | 20161867 | TN | 82 | 334 | 5 | + | <i>enn, mrp fbaA, prtF2, sfb1, sof</i> | + | - | - | - | - | - | C,G,H,I,Z     | 1 | -            | 29  | 216701 | 235328 | 1794815 |
| SAMN07154229 | 20161868 | TN | 82 | 334 | 5 | + | <i>enn, mrp fbaA, prtF2, sfb1, sof</i> | + | - | - | - | - | - | C,G,H,I,Z     | 1 | -            | 32  | 163154 | 240994 | 1795629 |
| SAMN07154230 | 20161869 | TN | 82 | 334 | 5 | + | <i>enn, mrp fbaA, prtF2, sfb1, sof</i> | + | - | - | - | - | - | C,G,H,I,Z     | 1 | -            | 30  | 216319 | 241000 | 1795892 |
| SAMN07154231 | 20161870 | TN | 82 | 334 | 5 | + | <i>enn, mrp fbaA, prtF2, sfb1, sof</i> | + | - | - | - | - | - | C,G,H,I,Z     | 1 | -            | 35  | 122750 | 235312 | 1796244 |
| SAMN07154234 | 20161873 | TN | 82 | 334 | 5 | + | <i>enn, mrp fbaA, prtF2, sfb1, sof</i> | + | - | - | - | - | - | C,G,H,I,Z     | 1 | -            | 32  | 222938 | 238072 | 1795486 |
| SAMN07154240 | 20162106 | CA | 82 | 334 | 5 | + | <i>enn, mrp fbaA, prtF2, sfb1, sof</i> | + | - | - | - | - | - | C,G,H,I,Z     | 1 | -            | 34  | 131937 | 235662 | 1796934 |
| SAMN07154241 | 20162107 | CA | 82 | 334 | 5 | + | <i>enn, mrp fbaA, prtF2, sfb1, sof</i> | + | - | - | - | - | - | C,G,H,I,Z     | 1 | -            | 45  | 125881 | 223986 | 1795221 |



|              |          |    |      |     |    |   |                 |                               |   |   |   |   |   |   |             |    |                                                  |     |        |        |         |
|--------------|----------|----|------|-----|----|---|-----------------|-------------------------------|---|---|---|---|---|---|-------------|----|--------------------------------------------------|-----|--------|--------|---------|
| SAMN07154245 | 20162111 | CA | 82   | 334 | 5  | + | <i>enn, mrp</i> | <i>fbaA, prtF2, sfb1, sof</i> | + | - | - | - | - | - | C,G,H,I,Z   | 1  | -                                                | 53  | 86268  | 236186 | 1837374 |
| SAMN07154266 | 20162133 | CA | 82   | 334 | 5  | + | <i>enn, mrp</i> | <i>fbaA, prtF2, sfb1, sof</i> | + | - | - | - | - | - | C,G,H,I,Z   | 1  | -                                                | 27  | 222986 | 238356 | 1800307 |
| SAMN07154304 | 20162412 | MN | 82   | 334 | 5  | + | <i>enn, mrp</i> | <i>fbaA, prtF2, sfb1, sof</i> | + | - | - | - | - | - | C,G,H,I,Z   | 1  | -                                                | 158 | 85324  | 237553 | 1821659 |
| SAMN07154306 | 20162414 | MN | 82   | 334 | 5  | + | <i>enn, mrp</i> | <i>fbaA, prtF2, sfb1, sof</i> | + | - | - | - | - | - | C,G,H,I,Z   | 1  | -                                                | 41  | 123760 | 240813 | 1798313 |
| SAMN07154331 | 20162631 | CO | 82   | 334 | 5  | + | <i>enn, mrp</i> | <i>fbaA, prtF2, sfb1, sof</i> | + | - | - | - | - | - | C,G,H,I,Z   | 1  | -                                                | 37  | 162994 | 240349 | 1797462 |
| SAMN07154339 | 20162639 | CO | 82   | 334 | 5  | + | <i>enn, mrp</i> | <i>fbaA, prtF2, sfb1, sof</i> | + | - | - | - | - | - | C,G,H,I,Z   | 1  | <i>ant6-la, aph3-III, sat4A</i>                  | 34  | 163126 | 235308 | 1889273 |
| SAMN07154345 | 20162645 | CO | 82   | 334 | 5  | + | <i>enn, mrp</i> | <i>fbaA, prtF2, sfb1, sof</i> | + | - | - | - | - | - | C,G,H,I,Z   | 1  | <i>tetM</i>                                      | 39  | 163114 | 282824 | 1892371 |
| SAMN07154350 | 20162650 | CO | 82   | 334 | 5  | + | <i>enn, mrp</i> | <i>fbaA, prtF2, sfb1, sof</i> | + | - | - | - | - | - | C,G,H,I,Z   | 1  | -                                                | 39  | 222878 | 240451 | 1800494 |
| SAMN07154356 | 20162656 | CO | 82   | 334 | 5  | + | <i>enn, mrp</i> | <i>fbaA, prtF2, sfb1, sof</i> | + | - | - | - | - | - | C,G,H,I,Z   | 1  | -                                                | 86  | 162970 | 240325 | 1806718 |
| SAMN07154368 | 20162668 | CO | 82   | 334 | 5  | + | <i>enn, mrp</i> | <i>fbaA, prtF2, sfb1, sof</i> | + | - | - | - | - | - | C,G,H,I,Z   | 1  | -                                                | 31  | 137098 | 235352 | 1794650 |
| SAMN07154411 | 20164919 | CO | 82   | 334 | 5  | + | <i>enn, mrp</i> | <i>fbaA, prtF2, sfb1, sof</i> | + | - | - | - | - | - | C,G,H,I,Z   | 1  | -                                                | 43  | 101208 | 235071 | 1791517 |
| SAMN07154425 | 20165974 | TN | 82   | 334 | 5  | + | <i>enn, mrp</i> | <i>fbaA, prtF2, sfb1, sof</i> | + | - | - | - | - | - | G,H,I,Z     | 1  | -                                                | 303 | 45752  | 103287 | 1811167 |
| SAMN07153781 | 20156437 | CA | 82   | 334 | 5  | + | <i>enn, mrp</i> | <i>fbaA, prtF2, sfb1, sof</i> | + | - | - | + | - | - | C,G,H,I,Z   | 1  | -                                                | 154 | 163055 | 235630 | 1827621 |
| SAMN07153074 | 20152973 | OR | 82   | 866 | 5  | + | <i>enn, mrp</i> | <i>fbaA, prtF2, sfb1, sof</i> | + | - | - | - | - | - | G,H,I,Z     | 1  | -                                                | 36  | 163575 | 237984 | 1769175 |
| SAMN07153719 | 20156270 | OR | 82   | 866 | 5  | + | <i>enn, mrp</i> | <i>fbaA, prtF2, sfb1, sof</i> | + | - | - | - | - | - | G,H,I,Z     | 1  | -                                                | 37  | 188081 | 238201 | 1762626 |
| SAMN07153941 | 20160246 | OR | 82   | 866 | 5  | + | <i>enn, mrp</i> | <i>fbaA, prtF2, sfb1, sof</i> | + | - | - | - | - | - | G,H,I,Z     | 1  | -                                                | 33  | 151104 | 238004 | 1762244 |
| SAMN07154111 | 20161203 | OR | 82   | 866 | 5  | + | <i>enn, mrp</i> | <i>fbaA, prtF2, sfb1, sof</i> | + | - | - | - | - | - | G,H,I,Z     | 1  | -                                                | 34  | 141260 | 235615 | 1763061 |
| SAMN07154122 | 20161237 | NY | 82   | 896 | 5  | + | <i>enn, mrp</i> | <i>fbaA, prtF2, sfb1, sof</i> | + | - | - | - | - | + | G,H,I,Z     | 1  | <i>ermB, tetM, cat, ant6-la, aph3-III, sat4A</i> | 44  | 82189  | 246039 | 1850060 |
| SAMN07154407 | 20164915 | CO | 82.7 | 36  | 12 | + | <i>mrp</i>      | <i>fbaA, prtF2, sfb1, sof</i> | + | + | - | - | + | + | A,C,G,H,I,Z | 1  | <i>mef, msrD</i>                                 | 60  | 131345 | 220546 | 1893906 |
| SAMN07153233 | 20154043 | CA | 83.1 | 5   | 83 | + | <i>enn, mrp</i> | <i>fbaA, prtF2</i>            | + | - | - | - | - | - | G,K,Z       | 2  | -                                                | 23  | 184970 | 241798 | 1676709 |
| SAMN07153271 | 20154153 | MN | 83.1 | 5   | 83 | + | <i>enn, mrp</i> | <i>fbaA, prtF2</i>            | + | - | - | - | - | - | G,K,Z       | 2  | -                                                | 20  | 203340 | 240953 | 1676073 |
| SAMN07153439 | 20155015 | MN | 83.1 | 5   | 83 | + | <i>enn, mrp</i> | <i>fbaA, prtF2</i>            | + | - | - | - | - | - | G,K,Z       | 2  | -                                                | 21  | 203435 | 240986 | 1676275 |
| SAMN07153748 | 20156401 | CA | 83.1 | 5   | 83 | + | <i>enn, mrp</i> | <i>fbaA, prtF2</i>            | + | - | - | - | - | - | G,K,Z       | 2  | -                                                | 16  | 205002 | 270625 | 1675704 |
| SAMN07153967 | 20160324 | MN | 83.1 | 5   | 83 | + | <i>enn, mrp</i> | <i>fbaA, prtF2</i>            | + | - | - | - | - | - | G,K,Z       | 2  | -                                                | 18  | 203431 | 240944 | 1676466 |
| SAMN07154159 | 20161443 | MN | 83.1 | 5   | 83 | + | <i>enn, mrp</i> | <i>fbaA, prtF2</i>            | + | - | - | - | - | - | G,K,Z       | 2  | -                                                | 15  | 203405 | 270593 | 1685420 |
| SAMN07154215 | 20161835 | OR | 83.1 | 853 | 83 | + | <i>enn, mrp</i> | <i>fbaA, prtF2</i>            | + | - | - | - | - | - | G,L,M,Z     | 2  | <i>ermTR, tetM, aph3-III, sat4A</i>              | 31  | 145837 | 244798 | 1735439 |
| SAMN07153004 | 20152307 | OR | 83.1 | 853 | 83 | + | <i>enn, mrp</i> | <i>fbaA, prtF2</i>            | + | - | - | - | - | - | G,L,M,Z     | 2  | <i>ermTR, tetM, aph3-III, sat4A</i>              | 72  | 55065  | 170360 | 1745134 |
| SAMN07153135 | 20153531 | OR | 83.1 | 853 | 83 | + | <i>enn, mrp</i> | <i>fbaA, prtF2</i>            | + | - | - | - | - | - | G,Z         | 2  | <i>ermTR, tetM, aph3-III, sat4A</i>              | 14  | 204973 | 306123 | 1710870 |
| SAMN07153139 | 20153535 | OR | 83.1 | 853 | 83 | + | <i>enn, mrp</i> | <i>fbaA, prtF2</i>            | + | - | - | - | - | - | G,L,M,Z     | 2  | <i>ermTR, tetM, aph3-III, sat4A</i>              | 22  | 171856 | 240973 | 1735719 |
| SAMN07153425 | 20154949 | OR | 83.1 | 853 | 83 | + | <i>enn, mrp</i> | <i>fbaA, prtF2</i>            | + | - | - | - | - | - | G,L,M,Z     | 2  | <i>ermTR, tetM, aph3-III, sat4A</i>              | 19  | 240060 | 328644 | 1739425 |
| SAMN07153545 | 20155386 | OR | 83.1 | 853 | 83 | + | <i>enn, mrp</i> | <i>fbaA, prtF2</i>            | + | - | - | - | - | - | G,L,M,Z     | 2  | <i>ermTR, tetM, aph3-III, sat4A</i>              | 24  | 203575 | 290835 | 1741888 |
| SAMN07153803 | 20156592 | OR | 83.1 | 853 | 83 | + | <i>enn, mrp</i> | <i>fbaA, prtF2</i>            | + | - | - | - | - | - | G,L,M,Z     | 2  | <i>ermTR, tetM, aph3-III, sat4A</i>              | 23  | 203183 | 250290 | 1734558 |
| SAMN07154109 | 20161201 | OR | 83.1 | 853 | 83 | + | <i>enn, mrp</i> | <i>fbaA, prtF2</i>            | + | - | - | - | - | - | G,L,M,Z     | 2  | <i>ermTR, tetM, aph3-III, sat4A</i>              | 20  | 170030 | 328727 | 1741212 |
| SAMN07153076 | 20152975 | OR | 85   | 849 | 59 | + | <i>enn, mrp</i> | <i>fbaA, prtF2, sfb1, sof</i> | + | - | - | - | - | + | G,H,I,I,Z   | 1  | -                                                | 40  | 88377  | 295075 | 1782570 |
| SAMN07153039 | 20152749 | NM | 87   | 62  | 28 | + | <i>enn, mrp</i> | <i>fbaA, prtF2, sfb1, sof</i> | + | - | - | - | + | + | G,J,S,Z     | 1  | -                                                | 44  | 89314  | 163163 | 1851310 |
| SAMN07153176 | 20153605 | CO | 87   | 62  | 28 | + | <i>enn, mrp</i> | <i>fbaA, prtF2, sfb1, sof</i> | + | - | - | - | + | + | G,J,S,Z     | 1  | -                                                | 57  | 73775  | 151320 | 1851219 |
| SAMN07153291 | 20154292 | NM | 87   | 62  | 28 | + | <i>enn, mrp</i> | <i>fbaA, prtF2, sfb1, sof</i> | + | - | - | - | + | + | C,G,J,S,Z   | 1  | -                                                | 55  | 76789  | 250165 | 1878729 |
| SAMN07153502 | 20155202 | GA | 87   | 62  | 28 | + | <i>enn, mrp</i> | <i>fbaA, prtF2, sfb1, sof</i> | + | - | - | - | + | + | C,G,S,Z     | 1  | -                                                | 89  | 40788  | 89416  | 1880631 |
| SAMN07153513 | 20155269 | NM | 87   | 62  | 28 | + | <i>enn, mrp</i> | <i>fbaA, prtF2, sfb1, sof</i> | + | - | - | - | + | + | C,G,J,S,Z   | 1  | -                                                | 51  | 77461  | 230701 | 1884127 |
| SAMN07153552 | 20155393 | OR | 87   | 62  | -  | + | <i>enn, mrp</i> | <i>fbaA, prtF2, sfb1, sof</i> | + | - | - | - | + | + | G,J,S,Z     | 1  | -                                                | 41  | 107543 | 204959 | 1843835 |
| SAMN07153591 | 20155602 | MD | 87   | 62  | 28 | + | <i>enn, mrp</i> | <i>fbaA, prtF2, sfb1, sof</i> | + | - | - | - | + | + | C,G,J,S,Z   | 1  | -                                                | 52  | 77464  | 262772 | 1879970 |
| SAMN07153646 | 20155658 | MD | 87   | 62  | 28 | + | <i>enn, mrp</i> | <i>fbaA, prtF2, sfb1, sof</i> | + | - | - | - | + | + | C,G,J,S,Z   | 1  | -                                                | 54  | 82310  | 262783 | 1879123 |
| SAMN07153673 | 20156112 | NM | 87   | 62  | 28 | + | <i>enn, mrp</i> | <i>fbaA, prtF2, sfb1, sof</i> | + | - | - | - | + | + | C,G,J,S,Z   | 1  | -                                                | 54  | 77455  | 163119 | 1879950 |
| SAMN07153743 | 20156396 | CA | 87   | 62  | 28 | + | <i>enn, mrp</i> | <i>fbaA, prtF2, sfb1, sof</i> | + | - | - | - | + | + | C,G,J,S,Z   | 28 | -                                                | 55  | 76394  | 152196 | 1876828 |
| SAMN07153756 | 20156412 | CA | 87   | 62  | 28 | + | <i>enn, mrp</i> | <i>fbaA, prtF2, sfb1, sof</i> | + | - | - | - | + | + | G,J,S,Z     | 1  | -                                                | 49  | 82249  | 163139 | 1845682 |

|              |          |    |      |     |    |   |                 |                               |   |   |   |   |   |   |             |   |                  |    |        |        |         |
|--------------|----------|----|------|-----|----|---|-----------------|-------------------------------|---|---|---|---|---|---|-------------|---|------------------|----|--------|--------|---------|
| SAMN07153858 | 20156782 | MD | 87   | 62  | 28 | + | <i>enn, mrp</i> | <i>fbaA, prtF2, sfb1, sof</i> | + | - | - | - | + | + | C,G,I,S,Z   | 1 | -                | 71 | 71365  | 163131 | 1917762 |
| SAMN07153922 | 20160141 | NM | 87   | 62  | 28 | + | <i>enn, mrp</i> | <i>fbaA, prtF2, sfb1, sof</i> | + | - | - | - | + | + | C,G,I,S,Z   | 1 | -                | 68 | 70105  | 163160 | 1881023 |
| SAMN07153991 | 20160495 | NM | 87   | 62  | 28 | + | <i>enn, mrp</i> | <i>fbaA, prtF2, sfb1, sof</i> | + | - | - | - | + | + | C,G,I,S,Z   | 1 | -                | 56 | 82484  | 230531 | 1880552 |
| SAMN07153995 | 20160499 | NM | 87   | 62  | 28 | + | <i>enn, mrp</i> | <i>fbaA, prtF2, sfb1, sof</i> | + | - | - | - | + | + | C,G,I,S,Z   | 1 | -                | 50 | 82461  | 230467 | 1878695 |
| SAMN07154001 | 20160747 | MD | 87   | 62  | 28 | + | <i>enn, mrp</i> | <i>fbaA, prtF2, sfb1, sof</i> | + | - | - | - | + | + | C,G,I,S,Z   | 1 | -                | 49 | 89259  | 275608 | 1830802 |
| SAMN07154051 | 20160975 | NY | 87   | 62  | 28 | + | <i>enn, mrp</i> | <i>fbaA, prtF2, sfb1, sof</i> | + | - | - | - | + | + | C,G,I,S,Z   | 1 | -                | 58 | 76773  | 163111 | 1876850 |
| SAMN07154059 | 20160986 | GA | 87   | 62  | 28 | + | <i>enn, mrp</i> | <i>fbaA, prtF2, sfb1, sof</i> | + | - | - | - | + | + | C,G,I,K,S,Z | 1 | -                | 71 | 77449  | 230729 | 1903330 |
| SAMN07154094 | 20161088 | CO | 87   | 62  | 28 | + | <i>enn, mrp</i> | <i>fbaA, prtF2, sfb1, sof</i> | + | - | - | - | + | + | C,G,I,S,Z   | 1 | -                | 52 | 77461  | 174205 | 1878593 |
| SAMN07154152 | 20161436 | MN | 87   | 62  | 28 | + | <i>enn, mrp</i> | <i>fbaA, prtF2, sfb1, sof</i> | + | - | - | - | + | + | C,G,I,S,Z   | 1 | -                | 56 | 107324 | 264637 | 1876864 |
| SAMN07154301 | 20162409 | MN | 87   | 62  | 28 | + | <i>enn, mrp</i> | <i>fbaA, prtF2, sfb1, sof</i> | + | - | - | - | + | + | C,G,I,S,Z   | 1 | -                | 58 | 107842 | 239693 | 1879248 |
| SAMN07154312 | 20162420 | MN | 87   | 62  | 28 | + | <i>enn, mrp</i> | <i>fbaA, prtF2, sfb1, sof</i> | + | - | - | - | + | + | C,G,I,S,Z   | 1 | -                | 56 | 82441  | 230483 | 1883397 |
| SAMN07154318 | 20162426 | MN | 87   | 62  | 28 | + | <i>enn, mrp</i> | <i>fbaA, prtF2, sfb1, sof</i> | + | - | - | - | + | + | G,I,S,Z     | 1 | -                | 38 | 138134 | 183385 | 1845893 |
| SAMN07154348 | 20162648 | CO | 87   | 62  | 28 | + | <i>enn, mrp</i> | <i>fbaA, prtF2, sfb1, sof</i> | + | - | - | - | + | + | C,G,I,S,Z   | 1 | -                | 58 | 82493  | 222774 | 1887499 |
| SAMN07154302 | 20162410 | MN | 87   | 890 | 28 | + | <i>enn, mrp</i> | <i>fbaA, prtF2, sfb1, sof</i> | + | - | - | - | + | + | C,G,I,S,Z   | 1 | -                | 53 | 82353  | 262721 | 1883582 |
| SAMN07154338 | 20162638 | CO | 87.3 | 62  | 28 | + | <i>enn, mrp</i> | <i>fbaA, prtF2, sfb1, sof</i> | + | - | - | - | + | + | C,G,S,Z     | 1 | -                | 82 | 89126  | 240451 | 1876820 |
| SAMN07154028 | 20160942 | TN | 89   | 101 | 89 | + | <i>enn, mrp</i> | <i>fbaA, prtF2, sfb1, sof</i> | - | - | - | - | + | + | C,G,Z       | 3 | -                | 30 | 111937 | 243572 | 1720925 |
| SAMN07154384 | 20163037 | TN | 89   | 101 | 89 | + | <i>enn, mrp</i> | <i>fbaA, prtF2, sfb1, sof</i> | - | - | - | - | + | + | C,G,Z       | 3 | -                | 27 | 117203 | 243795 | 1721041 |
| SAMN07152987 | 20152231 | NY | 89   | 101 | 89 | + | <i>enn, mrp</i> | <i>fbaA, prtF2, sfb1, sof</i> | - | - | - | - | + | + | C,G,Z       | 3 | -                | 40 | 87171  | 298691 | 1723998 |
| SAMN07152997 | 20152283 | GA | 89   | 101 | 89 | + | <i>enn, mrp</i> | <i>fbaA, prtF2, sfb1, sof</i> | - | - | - | - | + | + | G,Z         | 3 | -                | 63 | 42347  | 115647 | 1697713 |
| SAMN07153006 | 20152310 | OR | 89   | 101 | 89 | + | <i>enn, mrp</i> | <i>fbaA, prtF2, sfb1, sof</i> | - | - | - | - | + | + | G           | 3 | -                | 65 | 41634  | 106543 | 1695359 |
| SAMN07153007 | 20152311 | OR | 89   | 101 | 89 | + | <i>enn, mrp</i> | <i>fbaA, prtF2, sfb1, sof</i> | - | - | - | - | + | + | C,G,Z       | 3 | -                | 60 | 68995  | 138850 | 1727077 |
| SAMN07153021 | 20152525 | MN | 89   | 101 | 89 | + | <i>enn, mrp</i> | <i>fbaA, prtF2, sfb1, sof</i> | - | - | - | - | + | + | C,G,Z       | 3 | -                | 24 | 156512 | 695131 | 1763157 |
| SAMN07153026 | 20152732 | NM | 89   | 101 | 89 | - | <i>enn, mrp</i> | <i>fbaA, prtF2, sfb1, sof</i> | - | - | - | - | + | + | C,G,Z       | 3 | -                | 28 | 156504 | 412376 | 1723845 |
| SAMN07153038 | 20152748 | NM | 89   | 101 | 89 | + | <i>enn, mrp</i> | <i>fbaA, prtF2, sfb1, sof</i> | - | - | - | - | + | + | G,Z         | 3 | -                | 42 | 77309  | 386218 | 1724735 |
| SAMN07153041 | 20152751 | NM | 89   | 101 | 89 | + | <i>enn, mrp</i> | <i>fbaA, prtF2, sfb1, sof</i> | - | - | - | - | + | + | C,G,Z       | 3 | -                | 29 | 155873 | 412437 | 1722672 |
| SAMN07153042 | 20152752 | NM | 89   | 101 | 89 | + | <i>enn, mrp</i> | <i>fbaA, prtF2, sfb1, sof</i> | - | - | - | - | + | + | C,G,Z       | 3 | -                | 33 | 86761  | 412526 | 1725918 |
| SAMN07153062 | 20152791 | GA | 89   | 101 | 89 | + | <i>enn, mrp</i> | <i>fbaA, prtF2, sfb1, sof</i> | - | - | - | - | + | + | C,G,Z       | 3 | -                | 26 | 155993 | 412457 | 1723454 |
| SAMN07153063 | 20152792 | GA | 89   | 101 | 89 | + | <i>enn, mrp</i> | <i>fbaA, prtF2, sfb1, sof</i> | - | - | - | - | + | + | G,Z         | 3 | <i>parC-D10N</i> | 30 | 163137 | 386060 | 1796169 |
| SAMN07153067 | 20152796 | GA | 89   | 101 | 89 | + | <i>enn, mrp</i> | <i>fbaA, prtF2, sfb1, sof</i> | - | - | - | - | + | + | C,G,Z       | 3 | -                | 27 | 140243 | 412232 | 1723114 |
| SAMN07153068 | 20152835 | GA | 89   | 101 | 89 | + | <i>enn, mrp</i> | <i>fbaA, prtF2, sfb1, sof</i> | - | - | - | - | + | + | C,G,Z       | 3 | <i>parC-D10N</i> | 29 | 156742 | 344246 | 1771687 |
| SAMN07153079 | 20152978 | OR | 89   | 101 | 89 | + | <i>enn, mrp</i> | <i>fbaA, prtF2, sfb1, sof</i> | - | - | - | - | + | + | C,G,Z       | 3 | <i>ermTR</i>     | 29 | 144965 | 298671 | 1801059 |
| SAMN07153089 | 20153042 | GA | 89   | 101 | 89 | + | <i>enn, mrp</i> | <i>fbaA, prtF2, sfb1, sof</i> | - | - | - | - | + | + | C,G,Z       | 3 | -                | 28 | 155973 | 412469 | 1717672 |
| SAMN07153106 | 20153099 | TN | 89   | 101 | 89 | + | <i>enn, mrp</i> | <i>fbaA, prtF2, sfb1, sof</i> | - | - | - | - | + | + | C,G,Z       | 3 | -                | 35 | 113942 | 239407 | 1718364 |
| SAMN07153124 | 20153149 | GA | 89   | 101 | 89 | + | <i>enn, mrp</i> | <i>fbaA, prtF2, sfb1, sof</i> | - | - | - | - | + | + | C,G,Z       | 3 | -                | 25 | 127753 | 284912 | 1718391 |
| SAMN07153125 | 20153435 | GA | 89   | 101 | 89 | + | <i>enn, mrp</i> | <i>fbaA, prtF2, sfb1, sof</i> | - | - | - | - | + | + | G,Z         | 3 | <i>parC-D10N</i> | 28 | 156135 | 386063 | 1692602 |
| SAMN07153131 | 20153484 | NY | 89   | 101 | 89 | + | <i>enn, mrp</i> | <i>fbaA, prtF2, sfb1, sof</i> | - | - | - | - | + | + | G,Z         | 3 | -                | 25 | 156241 | 329132 | 1691422 |
| SAMN07153160 | 20153575 | NM | 89   | 101 | 89 | + | <i>enn, mrp</i> | <i>fbaA, prtF2, sfb1, sof</i> | - | - | - | - | + | + | C,G,Z       | 3 | -                | 31 | 155949 | 364336 | 1719069 |
| SAMN07153161 | 20153576 | NM | 89   | 101 | 89 | + | <i>enn, mrp</i> | <i>fbaA, prtF2, sfb1, sof</i> | - | - | - | - | + | + | C,G,Z       | 3 | -                | 32 | 155953 | 412372 | 1719750 |
| SAMN07153163 | 20153578 | NM | 89   | 101 | 89 | + | <i>enn, mrp</i> | <i>fbaA, prtF2, sfb1, sof</i> | - | - | - | - | + | + | C,G,Z       | 3 | -                | 28 | 156520 | 355575 | 1718718 |
| SAMN07153175 | 20153604 | CO | 89   | 101 | 89 | + | <i>enn, mrp</i> | <i>fbaA, prtF2, sfb1, sof</i> | - | - | - | - | + | + | C,G,Z       | 3 | <i>ermTR</i>     | 31 | 116205 | 412602 | 1735053 |
| SAMN07153207 | 20154016 | CA | 89   | 101 | 89 | + | <i>mrp</i>      | <i>fbaA, prtF2, sfb1, sof</i> | - | - | - | - | + | + | C,G,Z       | 3 | -                | 25 | 156232 | 412479 | 1709457 |
| SAMN07153208 | 20154017 | CA | 89   | 101 | 89 | + | <i>enn, mrp</i> | <i>fbaA, prtF2, sfb1, sof</i> | - | - | - | - | + | + | C,G,Z       | 3 | -                | 29 | 156473 | 412480 | 1718139 |
| SAMN07153209 | 20154018 | CA | 89   | 101 | 89 | + | <i>enn, mrp</i> | <i>fbaA, prtF2, sfb1, sof</i> | - | - | - | - | + | + | C,G,Z       | 3 | -                | 27 | 155965 | 412422 | 1716965 |
| SAMN07153211 | 20154020 | CA | 89   | 101 | 89 | + | <i>enn, mrp</i> | <i>fbaA, prtF2, sfb1, sof</i> | - | - | - | - | + | + | C,G,Z       | 3 | -                | 29 | 150009 | 412498 | 1743929 |
| SAMN07153217 | 20154026 | CA | 89   | 101 | 89 | + | <i>enn, mrp</i> | <i>fbaA, prtF2, sfb1, sof</i> | - | - | - | - | + | + | C,G,Z       | 3 | -                | 22 | 156386 | 412524 | 1721508 |

|              |          |    |    |     |    |   |                 |                               |   |   |   |   |   |   |         |   |                         |     |        |        |         |
|--------------|----------|----|----|-----|----|---|-----------------|-------------------------------|---|---|---|---|---|---|---------|---|-------------------------|-----|--------|--------|---------|
| SAMN07153255 | 20154136 | MN | 89 | 101 | 89 | + | <i>enn, mrp</i> | <i>fbaA, prtF2, sfb1, sof</i> | - | - | - | - | + | + | G,Z     | 3 | -                       | 25  | 163025 | 629976 | 1689754 |
| SAMN07153259 | 20154141 | MN | 89 | 101 | 89 | + | <i>enn, mrp</i> | <i>fbaA, prtF2, sfb1, sof</i> | - | - | - | - | + | + | G,Z     | 3 | -                       | 24  | 156277 | 386046 | 1690346 |
| SAMN07153270 | 20154152 | MN | 89 | 101 | 89 | + | <i>enn, mrp</i> | <i>fbaA, prtF2, sfb1, sof</i> | - | - | - | - | + | + | C,G,Z   | 3 | -                       | 26  | 155727 | 412452 | 1716778 |
| SAMN07153280 | 20154162 | MN | 89 | 101 | 89 | + | <i>enn, mrp</i> | <i>fbaA, prtF2, sfb1, sof</i> | - | - | - | - | + | + | G,Z     | 3 | -                       | 30  | 155558 | 629908 | 1688305 |
| SAMN07153289 | 20154290 | NM | 89 | 101 | 89 | + | <i>enn, mrp</i> | <i>fbaA, prtF2, sfb1, sof</i> | - | - | - | - | + | + | C,G,Z   | 3 | -                       | 24  | 156499 | 411443 | 1757262 |
| SAMN07153290 | 20154291 | NM | 89 | 101 | 89 | + | <i>enn, mrp</i> | <i>fbaA, prtF2, sfb1, sof</i> | - | - | - | - | + | + | C,G,Z   | 3 | -                       | 25  | 155861 | 412445 | 1716459 |
| SAMN07153298 | 20154299 | NM | 89 | 101 | 89 | + | <i>enn, mrp</i> | <i>fbaA, prtF2, sfb1, sof</i> | - | - | - | - | + | + | G,Z     | 3 | -                       | 39  | 80749  | 312897 | 1687356 |
| SAMN07153318 | 20154548 | CT | 89 | 101 | 89 | + | <i>mrp</i>      | <i>fbaA, prtF2, sfb1, sof</i> | - | - | - | - | + | + | C,G,Z   | 3 | -                       | 34  | 156165 | 412004 | 1722578 |
| SAMN07153319 | 20154549 | CT | 89 | 101 | 89 | + | <i>enn, mrp</i> | <i>fbaA, prtF2, sfb1, sof</i> | - | - | - | - | + | + | C,G,Z   | 3 | -                       | 36  | 103904 | 202026 | 1720718 |
| SAMN07153342 | 20154595 | TN | 89 | 101 | 89 | + | <i>enn, mrp</i> | <i>fbaA, prtF2, sfb1, sof</i> | - | - | - | - | + | + | C,G,Z   | 3 | -                       | 31  | 155762 | 450967 | 1760880 |
| SAMN07153343 | 20154596 | TN | 89 | 101 | 89 | + | <i>enn, mrp</i> | <i>fbaA, prtF2, sfb1, sof</i> | - | - | - | - | + | + | C,G,Z   | 3 | -                       | 34  | 116218 | 412698 | 1718313 |
| SAMN07153345 | 20154598 | TN | 89 | 101 | 89 | + | <i>enn, mrp</i> | <i>fbaA, prtF2, sfb1, sof</i> | - | - | - | - | + | + | C,G     | 3 | -                       | 25  | 155909 | 355483 | 1716640 |
| SAMN07153351 | 20154604 | TN | 89 | 101 | 89 | + | <i>enn, mrp</i> | <i>fbaA, prtF2, sfb1, sof</i> | - | - | - | - | + | + | G,Z     | 3 | -                       | 23  | 155815 | 385752 | 1695447 |
| SAMN07153360 | 20154614 | TN | 89 | 101 | 89 | + | <i>enn, mrp</i> | <i>fbaA, prtF2, sfb1, sof</i> | - | - | - | - | + | + | C,G,Z   | 3 | -                       | 22  | 163085 | 412473 | 1764348 |
| SAMN07153368 | 20154622 | GA | 89 | 101 | 89 | + | <i>enn, mrp</i> | <i>fbaA, prtF2, sfb1, sof</i> | - | - | - | - | + | + | G,Z     | 3 | -                       | 24  | 155913 | 386025 | 1695100 |
| SAMN07153372 | 20154627 | GA | 89 | 101 | 89 | + | <i>enn, mrp</i> | <i>fbaA, prtF2, sfb1, sof</i> | - | - | - | - | + | + | C,G,Z   | 3 | <i>parC-D10N</i>        | 35  | 76324  | 189857 | 1719844 |
| SAMN07153381 | 20154680 | NM | 89 | 101 | 89 | + | <i>enn, mrp</i> | <i>fbaA, prtF2, sfb1, sof</i> | - | - | - | - | + | + | C,G,Z   | 3 | -                       | 27  | 114341 | 298119 | 1717354 |
| SAMN07153415 | 20154819 | CO | 89 | 101 | 89 | + | <i>enn, mrp</i> | <i>fbaA, prtF2, sfb1, sof</i> | - | - | - | - | + | + | C,G,Z   | 3 | -                       | 29  | 109564 | 280037 | 1719808 |
| SAMN07153416 | 20154820 | CO | 89 | 101 | 89 | + | <i>enn, mrp</i> | <i>fbaA, prtF2, sfb1, sof</i> | - | - | - | - | + | + | G,Z     | 3 | -                       | 30  | 114660 | 271895 | 1692682 |
| SAMN07153426 | 20154950 | OR | 89 | 101 | 89 | + | <i>enn, mrp</i> | <i>fbaA, prtF2, sfb1, sof</i> | - | - | - | - | + | + | G,Z     | 3 | -                       | 44  | 115766 | 649084 | 1714882 |
| SAMN07153429 | 20154953 | OR | 89 | 101 | 89 | + | <i>enn, mrp</i> | <i>fbaA, prtF2, sfb1, sof</i> | - | - | - | - | + | + | C,G,Z   | 3 | -                       | 30  | 155767 | 412592 | 1713756 |
| SAMN07153441 | 20155017 | MN | 89 | 101 | 89 | + | <i>enn, mrp</i> | <i>fbaA, prtF2, sfb1, sof</i> | - | - | - | - | + | + | C,G,Z   | 3 | -                       | 22  | 163001 | 412409 | 1716165 |
| SAMN07153443 | 20155019 | MN | 89 | 101 | 89 | + | <i>enn, mrp</i> | <i>fbaA, prtF2, sfb1, sof</i> | - | - | - | - | + | + | G,Z     | 3 | -                       | 124 | 156261 | 386081 | 1739417 |
| SAMN07153444 | 20155020 | MN | 89 | 101 | 89 | + | <i>enn, mrp</i> | <i>fbaA, prtF2, sfb1, sof</i> | - | - | - | - | + | + | G,Z     | 3 | -                       | 41  | 162801 | 629779 | 1686940 |
| SAMN07153447 | 20155024 | MN | 89 | 101 | 89 | + | <i>enn, mrp</i> | <i>fbaA, prtF2, sfb1, sof</i> | - | - | - | - | + | + | G,Z     | 3 | -                       | 23  | 156512 | 386145 | 1691160 |
| SAMN07153450 | 20155027 | MN | 89 | 101 | 89 | + | <i>enn, mrp</i> | <i>fbaA, prtF2, sfb1, sof</i> | - | - | - | - | + | + | C,G,Z   | 3 | -                       | 23  | 153671 | 451381 | 1757863 |
| SAMN07153461 | 20155039 | MN | 89 | 101 | 89 | + | <i>enn, mrp</i> | <i>fbaA, prtF2, sfb1, sof</i> | - | - | - | - | + | + | C,G,Z   | 3 | -                       | 21  | 156290 | 412410 | 1721886 |
| SAMN07153483 | 20155062 | MN | 89 | 101 | 89 | + | <i>enn, mrp</i> | <i>fbaA, prtF2, sfb1, sof</i> | - | - | - | - | + | + | C,G,Z   | 3 | -                       | 30  | 140469 | 412425 | 1718025 |
| SAMN07153492 | 20155071 | MN | 89 | 101 | 89 | + | <i>enn, mrp</i> | <i>fbaA, prtF2, sfb1, sof</i> | - | - | - | - | + | + | C,G     | 3 | -                       | 33  | 109670 | 412461 | 1718697 |
| SAMN07153501 | 20155201 | GA | 89 | 101 | 89 | + | <i>enn, mrp</i> | <i>fbaA, prtF2, sfb1, sof</i> | - | - | - | - | + | + | C,G,Z   | 3 | <i>ermTR, parC-D10N</i> | 57  | 63124  | 163173 | 1781486 |
| SAMN07153510 | 20155266 | NM | 89 | 101 | 89 | + | <i>enn, mrp</i> | <i>fbaA, prtF2, sfb1, sof</i> | - | - | - | - | + | + | C,G,Z   | 3 | -                       | 31  | 149940 | 412708 | 1743928 |
| SAMN07153518 | 20155359 | CT | 89 | 101 | 89 | + | <i>enn, mrp</i> | <i>fbaA, prtF2, sfb1, sof</i> | - | - | - | - | + | + | G,Z     | 3 | -                       | 27  | 156217 | 386126 | 1688732 |
| SAMN07153533 | 20155374 | CT | 89 | 101 | 89 | + | <i>enn, mrp</i> | <i>fbaA, prtF2, sfb1, sof</i> | - | - | - | - | + | + | G,Z     | 3 | -                       | 25  | 155840 | 386028 | 1689843 |
| SAMN07153535 | 20155376 | CT | 89 | 101 | 89 | + | <i>enn, mrp</i> | <i>fbaA, prtF2, sfb1, sof</i> | - | - | - | - | + | + | C,G,Z   | 3 | -                       | 24  | 155977 | 364186 | 1722491 |
| SAMN07153547 | 20155388 | OR | 89 | 101 | 89 | + | <i>enn, mrp</i> | <i>fbaA, prtF2, sfb1, sof</i> | - | - | - | - | + | + | C,G,Z   | 3 | -                       | 22  | 156310 | 656440 | 1716210 |
| SAMN07153551 | 20155392 | OR | 89 | 101 | 89 | + | <i>enn, mrp</i> | <i>fbaA, prtF2, sfb1, sof</i> | - | - | - | - | + | + | C,G,Z   | 3 | -                       | 33  | 156229 | 325172 | 1754633 |
| SAMN07153561 | 20155413 | NY | 89 | 101 | 89 | + | <i>enn, mrp</i> | <i>fbaA, prtF2, sfb1, sof</i> | - | - | - | - | + | + | C,G,K,Z | 3 | -                       | 37  | 101424 | 250901 | 1746256 |
| SAMN07153568 | 20155576 | TN | 89 | 101 | 89 | + | <i>enn, mrp</i> | <i>fbaA, prtF2, sfb1, sof</i> | - | - | - | - | + | + | C,G,K,Z | 3 | -                       | 35  | 80155  | 247457 | 1843320 |
| SAMN07153586 | 20155596 | MD | 89 | 101 | 89 | + | <i>enn, mrp</i> | <i>fbaA, prtF2, sfb1, sof</i> | - | - | - | - | + | + | C,G,Z   | 3 | -                       | 28  | 155877 | 412434 | 1717169 |
| SAMN07153599 | 20155610 | MD | 89 | 101 | 89 | + | <i>enn, mrp</i> | <i>fbaA, prtF2, sfb1, sof</i> | - | - | - | - | + | + | G,Z     | 3 | <i>tetM</i>             | 23  | 163118 | 426491 | 1818292 |
| SAMN07153601 | 20155612 | MD | 89 | 101 | 89 | + | <i>enn, mrp</i> | <i>fbaA, prtF2, sfb1, sof</i> | - | - | - | - | + | + | G,Z     | 3 | -                       | 26  | 156291 | 386076 | 1692651 |
| SAMN07153625 | 20155637 | MD | 89 | 101 | 89 | + | <i>enn, mrp</i> | <i>fbaA, prtF2, sfb1, sof</i> | - | - | - | - | + | + | C,G,Z   | 3 | -                       | 30  | 144070 | 243890 | 1762573 |
| SAMN07153639 | 20155651 | MD | 89 | 101 | 89 | + | <i>enn, mrp</i> | <i>fbaA, prtF2, sfb1, sof</i> | - | - | - | - | + | + | C,G,Z   | 3 | -                       | 33  | 144006 | 244101 | 1815748 |
| SAMN07153659 | 20156098 | NM | 89 | 101 | 89 | + | <i>enn, mrp</i> | <i>fbaA, prtF2, sfb1, sof</i> | - | - | - | - | + | + | C,G,Z   | 3 | -                       | 62  | 64912  | 143846 | 1714875 |
| SAMN07153674 | 20156113 | NM | 89 | 101 | 89 | + | <i>enn, mrp</i> | <i>fbaA, prtF2, sfb1, sof</i> | - | - | - | - | + | + | C,G,Z   | 3 | -                       | 24  | 156453 | 243892 | 1718535 |

|              |          |    |    |     |    |   |                 |                               |   |   |   |   |   |   |         |   |                        |     |        |        |         |
|--------------|----------|----|----|-----|----|---|-----------------|-------------------------------|---|---|---|---|---|---|---------|---|------------------------|-----|--------|--------|---------|
| SAMN07153676 | 20156155 | NY | 89 | 101 | 89 | + | <i>enn, mrp</i> | <i>fbaA, prtF2, sfb1, sof</i> | - | - | - | - | + | + | C,G,K,Z | 3 | -                      | 28  | 121396 | 243935 | 1745933 |
| SAMN07153681 | 20156160 | NY | 89 | 101 | 89 | + | <i>enn, mrp</i> | <i>fbaA, prtF2, sfb1, sof</i> | - | - | - | - | + | + | C,G,Z   | 3 | -                      | 26  | 156355 | 412405 | 1717349 |
| SAMN07153708 | 20156187 | MN | 89 | 101 | 89 | + | <i>enn, mrp</i> | <i>fbaA, prtF2, sfb1, sof</i> | - | - | - | - | + | + | G,Z     | 3 | -                      | 27  | 114050 | 272111 | 1689927 |
| SAMN07153710 | 20156189 | MN | 89 | 101 | 89 | + | <i>enn, mrp</i> | <i>fbaA, prtF2, sfb1, sof</i> | - | - | - | - | + | + | G,Z     | 3 | -                      | 23  | 156758 | 386111 | 1692137 |
| SAMN07153711 | 20156190 | MN | 89 | 101 | 89 | + | <i>enn, mrp</i> | <i>fbaA, prtF2, sfb1, sof</i> | - | - | - | - | + | + | G,Z     | 3 | -                      | 23  | 155742 | 386072 | 1689054 |
| SAMN07153730 | 20156361 | NM | 89 | 101 | 89 | + | <i>enn, mrp</i> | <i>fbaA, prtF2, sfb1, sof</i> | - | - | - | - | + | + | C,G,Z   | 3 | <i>ermTR, tetM</i>     | 26  | 163125 | 412411 | 1826241 |
| SAMN07153732 | 20156363 | NM | 89 | 101 | 89 | + | <i>enn, mrp</i> | <i>fbaA, prtF2, sfb1, sof</i> | - | - | - | - | + | + | C,G,Z   | 3 | -                      | 32  | 104871 | 298318 | 1720544 |
| SAMN07153767 | 20156423 | CA | 89 | 101 | 89 | + | <i>enn, mrp</i> | <i>fbaA, prtF2, sfb1, sof</i> | - | - | - | - | + | + | G,Z     | 3 | <i>ermT</i>            | 27  | 156242 | 386036 | 1697193 |
| SAMN07153769 | 20156425 | CA | 89 | 101 | 89 | + | <i>enn, mrp</i> | <i>fbaA, prtF2, sfb1, sof</i> | - | - | - | - | + | + | G,Z     | 3 | -                      | 29  | 156116 | 386038 | 1691598 |
| SAMN07153778 | 20156434 | CA | 89 | 101 | 89 | + | <i>enn, mrp</i> | <i>fbaA, prtF2, sfb1, sof</i> | + | - | - | - | + | + | C,G,Z   | 3 | -                      | 43  | 77237  | 355449 | 1722315 |
| SAMN07153795 | 20156451 | CA | 89 | 101 | 89 | + | <i>enn, mrp</i> | <i>fbaA, prtF2, sfb1, sof</i> | - | - | - | - | + | + | G,Z     | 3 | -                      | 32  | 163017 | 385949 | 1733148 |
| SAMN07153809 | 20156598 | OR | 89 | 101 | 89 | + | <i>enn, mrp</i> | <i>fbaA, prtF2, sfb1, sof</i> | - | - | - | - | + | + | C,G,Z   | 3 | -                      | 25  | 156218 | 412460 | 1717665 |
| SAMN07153816 | 20156629 | TN | 89 | 101 | 89 | + | <i>enn, mrp</i> | <i>fbaA, prtF2, sfb1, sof</i> | - | - | - | - | + | + | C,G,Z   | 3 | -                      | 23  | 156100 | 412448 | 1716370 |
| SAMN07153824 | 20156637 | NY | 89 | 101 | 89 | + | <i>enn, mrp</i> | <i>fbaA, prtF2, sfb1, sof</i> | - | - | - | - | + | + | G,Z     | 3 | -                      | 31  | 156245 | 386317 | 1693577 |
| SAMN07153828 | 20156641 | NY | 89 | 101 | 89 | + | <i>enn, mrp</i> | <i>fbaA, prtF2, sfb1, sof</i> | - | - | - | - | + | + | C,G,Z   | 3 | -                      | 31  | 114176 | 298661 | 1716173 |
| SAMN07153838 | 20156714 | CT | 89 | 101 | 89 | + | <i>enn, mrp</i> | <i>fbaA, prtF2, sfb1, sof</i> | - | - | - | - | + | + | C,G,Z   | 3 | -                      | 38  | 116086 | 267954 | 1718857 |
| SAMN07153842 | 20156718 | CT | 89 | 101 | 89 | + | <i>enn, mrp</i> | <i>fbaA, prtF2, sfb1, sof</i> | - | - | - | - | + | + | G,Z     | 3 | -                      | 64  | 155801 | 243825 | 1698988 |
| SAMN07153859 | 20156783 | MD | 89 | 101 | 89 | + | <i>enn, mrp</i> | <i>fbaA, prtF2, sfb1, sof</i> | - | - | - | - | + | + | C,G,Z   | 3 | -                      | 35  | 114379 | 244075 | 1761491 |
| SAMN07153863 | 20156787 | MD | 89 | 101 | 89 | + | <i>enn, mrp</i> | <i>fbaA, prtF2, sfb1, sof</i> | - | - | - | - | + | + | C,G,Z   | 3 | -                      | 52  | 112617 | 244142 | 1808580 |
| SAMN07153872 | 20156796 | MD | 89 | 101 | 89 | + | <i>enn, mrp</i> | <i>fbaA, prtF2, sfb1, sof</i> | - | - | - | - | + | + | C,G     | 3 | -                      | 47  | 148062 | 487429 | 1802953 |
| SAMN07153883 | 20160010 | CO | 89 | 101 | 89 | + | <i>mrp</i>      | <i>fbaA, prtF2, sfb1, sof</i> | - | - | - | - | + | + | C,G,Z   | 3 | -                      | 23  | 112612 | 451263 | 1794487 |
| SAMN07153885 | 20160012 | CO | 89 | 101 | 89 | + | <i>enn, mrp</i> | <i>fbaA, prtF2, sfb1, sof</i> | - | - | - | - | + | + | C,G,Z   | 3 | -                      | 30  | 111859 | 391344 | 1714960 |
| SAMN07153902 | 20160029 | CO | 89 | 101 | 89 | + | <i>enn, mrp</i> | <i>fbaA, prtF2, sfb1, sof</i> | - | - | - | - | + | + | C,G,Z   | 3 | -                      | 243 | 130549 | 282056 | 1761965 |
| SAMN07153909 | 20160037 | CO | 89 | 101 | 89 | - | <i>enn, mrp</i> | <i>fbaA, prtF2, sfb1, sof</i> | - | - | - | - | + | + | C,G,Z   | 3 | -                      | 30  | 155929 | 412448 | 1724465 |
| SAMN07153920 | 20160139 | NM | 89 | 101 | 89 | + | <i>enn, mrp</i> | <i>fbaA, prtF2, sfb1, sof</i> | - | - | - | - | + | + | C,G,Z   | 3 | -                      | 37  | 163017 | 241244 | 1718663 |
| SAMN07153924 | 20160143 | NM | 89 | 101 | 89 | + | <i>enn, mrp</i> | <i>fbaA, prtF2, sfb1, sof</i> | - | - | - | - | + | + | C,G,Z   | 3 | <i>parC-S6F</i>        | 29  | 112049 | 345132 | 1757724 |
| SAMN07153936 | 20160181 | GA | 89 | 101 | 89 | + | <i>enn, mrp</i> | <i>fbaA, prtF2, sfb1, sof</i> | - | - | - | - | + | + | C,G,Z   | 3 | <i>ermTR, parC-D5A</i> | 30  | 112054 | 336016 | 1759492 |
| SAMN07153943 | 20160248 | OR | 89 | 101 | 89 | + | <i>enn, mrp</i> | <i>fbaA, prtF2, sfb1, sof</i> | - | - | - | - | + | + | C,G,Z   | 3 | -                      | 24  | 156849 | 371062 | 1717709 |
| SAMN07153959 | 20160316 | MN | 89 | 101 | 89 | + | <i>enn, mrp</i> | <i>fbaA, prtF2, sfb1, sof</i> | - | - | - | - | + | + | G,Z     | 3 | -                      | 21  | 156853 | 386053 | 1716432 |
| SAMN07153966 | 20160323 | MN | 89 | 101 | 89 | + | <i>enn, mrp</i> | <i>fbaA, prtF2, sfb1, sof</i> | - | - | - | - | + | + | G,Z     | 3 | -                      | 22  | 156401 | 386107 | 1691153 |
| SAMN07153973 | 20160330 | MN | 89 | 101 | 89 | + | <i>enn, mrp</i> | <i>fbaA, prtF2, sfb1, sof</i> | - | - | - | - | + | + | C,G,Z   | 3 | -                      | 20  | 156330 | 481461 | 1790857 |
| SAMN07153974 | 20160331 | MN | 89 | 101 | 89 | + | <i>enn, mrp</i> | <i>fbaA, prtF2, sfb1, sof</i> | - | - | - | - | + | + | C,G,Z   | 3 | -                      | 22  | 111990 | 306079 | 1791242 |
| SAMN07153981 | 20160452 | GA | 89 | 101 | 89 | + | <i>enn, mrp</i> | <i>fbaA, prtF2, sfb1, sof</i> | - | - | - | - | + | + | C,G,Z   | 3 | -                      | 24  | 156077 | 670007 | 1730862 |
| SAMN07153989 | 20160493 | NM | 89 | 101 | 89 | + | <i>enn, mrp</i> | <i>fbaA, prtF2, sfb1, sof</i> | - | - | - | - | + | + | G,Z     | 3 | -                      | 25  | 156772 | 386308 | 1692032 |
| SAMN07153990 | 20160494 | NM | 89 | 101 | 89 | + | <i>enn, mrp</i> | <i>fbaA, prtF2, sfb1, sof</i> | - | - | - | - | + | + | C,G,Z   | 3 | -                      | 23  | 156201 | 412718 | 1722488 |
| SAMN07153993 | 20160497 | NM | 89 | 101 | 89 | + | <i>enn, mrp</i> | <i>fbaA, prtF2, sfb1, sof</i> | - | - | - | - | + | + | G,Z     | 3 | -                      | 26  | 116258 | 386263 | 1692493 |
| SAMN07153996 | 20160500 | NM | 89 | 101 | 89 | + | <i>enn, mrp</i> | <i>fbaA, prtF2, sfb1, sof</i> | - | - | - | - | + | + | C,G,Z   | 3 | -                      | 21  | 156697 | 412730 | 1717780 |
| SAMN07154011 | 20160757 | MD | 89 | 101 | 89 | + | <i>enn, mrp</i> | <i>fbaA, prtF2, sfb1, sof</i> | - | - | - | - | + | + | C,G,Z   | 3 | -                      | 25  | 156673 | 412620 | 1724469 |
| SAMN07154034 | 20160948 | CT | 89 | 101 | 89 | + | <i>mrp</i>      | <i>fbaA, prtF2, sfb1, sof</i> | - | - | - | - | + | + | C,G,Z   | 3 | -                      | 23  | 156864 | 243865 | 1716901 |
| SAMN07154038 | 20160952 | CT | 89 | 101 | 89 | + | <i>enn, mrp</i> | <i>fbaA, prtF2, sfb1, sof</i> | - | - | - | - | + | + | C,G,Z   | 3 | -                      | 27  | 116576 | 412443 | 1718263 |
| SAMN07154042 | 20160956 | OR | 89 | 101 | 89 | + | <i>enn, mrp</i> | <i>fbaA, prtF2, sfb1, sof</i> | - | - | - | - | + | + | C,G,Z   | 3 | -                      | 29  | 155869 | 451394 | 1756727 |
| SAMN07154043 | 20160957 | OR | 89 | 101 | 89 | + | <i>enn, mrp</i> | <i>fbaA, prtF2, sfb1, sof</i> | - | - | - | - | + | + | C,G,Z   | 3 | -                      | 24  | 163114 | 306934 | 1799204 |
| SAMN07154048 | 20160972 | NY | 89 | 101 | 89 | + | <i>enn, mrp</i> | <i>fbaA, prtF2, sfb1, sof</i> | - | - | - | - | + | + | C,G,K,Z | 3 | -                      | 31  | 151817 | 250927 | 1745114 |
| SAMN07154049 | 20160973 | NY | 89 | 101 | 89 | + | <i>enn, mrp</i> | <i>fbaA, prtF2, sfb1, sof</i> | - | - | - | - | + | + | C,G,Z   | 3 | -                      | 28  | 155472 | 412465 | 1717290 |
| SAMN07154050 | 20160974 | NY | 89 | 101 | 89 | + | <i>enn, mrp</i> | <i>fbaA, prtF2, sfb1, sof</i> | - | - | - | - | + | + | C,G,K,Z | 3 | <i>parC-S6F</i>        | 47  | 109387 | 144940 | 1742807 |

|              |          |    |    |     |    |   |          |                        |   |   |   |   |   |   |       |    |       |     |        |        |         |
|--------------|----------|----|----|-----|----|---|----------|------------------------|---|---|---|---|---|---|-------|----|-------|-----|--------|--------|---------|
| SAMN07154054 | 20160978 | NY | 89 | 101 | 89 | + | enn, mrp | fbaA, prtF2, sfb1, sof | - | - | - | - | + | + | G,Z   | 3  | -     | 45  | 69450  | 162243 | 1740771 |
| SAMN07154055 | 20160979 | NY | 89 | 101 | 89 | + | enn, mrp | fbaA, prtF2, sfb1, sof | - | - | - | - | + | + | C,G,Z | 3  | -     | 28  | 140230 | 412444 | 1718328 |
| SAMN07154061 | 20160988 | GA | 89 | 101 | 89 | + | enn, mrp | fbaA, prtF2, sfb1, sof | - | - | - | - | + | + | C,G,Z | 3  | -     | 23  | 156575 | 412684 | 1718041 |
| SAMN07154089 | 20161083 | CO | 89 | 101 | 89 | + | enn, mrp | fbaA, prtF2, sfb1, sof | - | - | - | - | + | + | C,G,Z | 3  | -     | 31  | 112086 | 335991 | 1718252 |
| SAMN07154099 | 20161093 | CO | 89 | 101 | 89 | + | enn, mrp | fbaA, prtF2, sfb1, sof | - | - | - | - | + | + | C,G,Z | 3  | -     | 29  | 116213 | 412739 | 1718563 |
| SAMN07154101 | 20161095 | CO | 89 | 101 | 89 | + | enn, mrp | fbaA, prtF2, sfb1, sof | - | - | - | - | + | + | C,G,Z | 3  | -     | 29  | 116233 | 412704 | 1719332 |
| SAMN07154116 | 20161231 | NY | 89 | 101 | 89 | + | enn, mrp | fbaA, prtF2, sfb1, sof | - | - | - | - | + | + | C,G,Z | 3  | -     | 36  | 155889 | 412507 | 1720051 |
| SAMN07154119 | 20161234 | NY | 89 | 101 | 89 | + | enn, mrp | fbaA, prtF2, sfb1, sof | - | - | - | - | + | + | C,G,Z | 3  | -     | 23  | 156217 | 412711 | 1716270 |
| SAMN07154124 | 20161239 | NY | 89 | 101 | 89 | + | enn, mrp | fbaA, prtF2, sfb1, sof | - | - | - | - | + | + | C,G,Z | 3  | -     | 25  | 156096 | 412657 | 1717676 |
| SAMN07154128 | 20161328 | NM | 89 | 101 | 89 | + | enn, mrp | fbaA, prtF2, sfb1, sof | - | - | - | - | + | + | C,G,Z | 3  | -     | 32  | 147749 | 264933 | 1717253 |
| SAMN07154131 | 20161332 | NM | 89 | 101 | 89 | + | enn, mrp | fbaA, prtF2, sfb1, sof | - | - | - | - | + | + | C,G,Z | 3  | -     | 29  | 112058 | 277221 | 1719065 |
| SAMN07154138 | 20161339 | NM | 89 | 101 | 89 | + | enn, mrp | fbaA, prtF2, sfb1, sof | - | - | - | - | + | + | C,G,Z | 3  | -     | 32  | 161451 | 251106 | 1779021 |
| SAMN07154139 | 20161340 | NM | 89 | 101 | 89 | + | enn, mrp | fbaA, prtF2, sfb1, sof | - | - | - | - | + | + | C,G,Z | 3  | -     | 25  | 155833 | 412431 | 1715794 |
| SAMN07154144 | 20161428 | MN | 89 | 101 | 89 | + | enn, mrp | fbaA, prtF2, sfb1, sof | - | - | - | - | + | + | G,Z   | 3  | -     | 29  | 162961 | 385838 | 1689237 |
| SAMN07154149 | 20161433 | MN | 89 | 101 | 89 | + | enn, mrp | fbaA, prtF2, sfb1, sof | - | - | - | - | + | + | G,Z   | 3  | -     | 27  | 162973 | 272076 | 1689174 |
| SAMN07154151 | 20161435 | MN | 89 | 101 | 89 | + | enn, mrp | fbaA, prtF2, sfb1, sof | - | - | - | - | + | + | C,G,Z | 3  | -     | 23  | 156218 | 412350 | 1715355 |
| SAMN07154155 | 20161439 | MN | 89 | 101 | 89 | + | enn, mrp | fbaA, prtF2, sfb1, sof | - | - | - | - | + | + | C,G,Z | 3  | -     | 28  | 155817 | 412564 | 1722249 |
| SAMN07154162 | 20161446 | MN | 89 | 101 | 89 | + | enn, mrp | fbaA, prtF2, sfb1, sof | - | - | - | - | + | + | C,G,Z | 3  | -     | 37  | 141171 | 412453 | 1766426 |
| SAMN07154167 | 20161451 | MN | 89 | 101 | 89 | + | enn, mrp | fbaA, prtF2, sfb1, sof | - | - | - | - | + | + | G,Z   | 3  | -     | 31  | 106276 | 244099 | 1689479 |
| SAMN07154168 | 20161452 | MN | 89 | 101 | 89 | + | enn, mrp | fbaA, prtF2, sfb1, sof | - | - | - | - | + | + | C,G,Z | 3  | -     | 26  | 156732 | 412721 | 1742588 |
| SAMN07154169 | 20161453 | MN | 89 | 101 | 89 | + | enn, mrp | fbaA, prtF2, sfb1, sof | - | - | - | - | + | + | C,G,Z | 3  | -     | 26  | 156760 | 271323 | 1743730 |
| SAMN07154179 | 20161540 | GA | 89 | 101 | 89 | + | enn, mrp | fbaA, prtF2, sfb1, sof | - | - | - | - | + | + | G,Z   | 16 | -     | 25  | 156508 | 386120 | 1696235 |
| SAMN07154183 | 20161716 | MD | 89 | 101 | 89 | + | enn, mrp | fbaA, prtF2, sfb1, sof | - | - | - | - | + | + | C,G,Z | 3  | -     | 83  | 67974  | 217167 | 1788790 |
| SAMN07154184 | 20161717 | MD | 89 | 101 | 89 | + | enn, mrp | fbaA, prtF2, sfb1, sof | - | - | - | - | + | + | C,G,Z | 3  | -     | 45  | 79882  | 342384 | 1721963 |
| SAMN07154192 | 20161726 | MD | 89 | 101 | 89 | + | enn, mrp | fbaA, prtF2, sfb1, sof | - | - | - | - | + | + | C,G,Z | 3  | -     | 40  | 99017  | 249322 | 1755530 |
| SAMN07154194 | 20161728 | MD | 89 | 101 | 89 | + | enn, mrp | fbaA, prtF2, sfb1, sof | - | - | - | - | + | + | C,G,Z | 3  | -     | 66  | 162765 | 412074 | 1711982 |
| SAMN07154200 | 20161740 | CT | 89 | 101 | 89 | + | enn, mrp | fbaA, prtF2, sfb1, sof | - | - | - | - | + | + | C,G,Z | 3  | -     | 67  | 46204  | 140198 | 1721402 |
| SAMN07154220 | 20161840 | OR | 89 | 101 | 89 | + | enn, mrp | fbaA, prtF2, sfb1, sof | - | - | - | - | + | + | C,G,Z | 3  | -     | 25  | 155871 | 451375 | 1756132 |
| SAMN07154250 | 20162117 | CA | 89 | 101 | 89 | + | enn, mrp | fbaA, prtF2, sfb1, sof | - | - | - | - | + | + | C,G   | 3  | -     | 22  | 156000 | 412367 | 1715801 |
| SAMN07154258 | 20162125 | CA | 89 | 101 | 89 | + | enn, mrp | fbaA, prtF2, sfb1, sof | - | - | - | - | + | + | G,Z   | 3  | -     | 30  | 178379 | 386055 | 1732409 |
| SAMN07154261 | 20162128 | CA | 89 | 101 | 89 | + | enn, mrp | fbaA, prtF2, sfb1, sof | - | - | - | - | + | + | C,G,Z | 3  | -     | 35  | 112400 | 178330 | 1717204 |
| SAMN07154274 | 20162141 | CA | 89 | 101 | 89 | + | enn, mrp | fbaA, prtF2, sfb1, sof | - | - | - | - | + | + | G,Z   | 3  | -     | 36  | 156173 | 630051 | 1723540 |
| SAMN07154278 | 20162146 | CA | 89 | 101 | 89 | + | mrp      | fbaA, prtF2, sfb1, sof | - | - | - | - | + | + | C,G,Z | 3  | -     | 27  | 151755 | 656347 | 1712332 |
| SAMN07154281 | 20162149 | CA | 89 | 101 | 89 | + | enn, mrp | fbaA, prtF2, sfb1, sof | - | - | - | - | + | + | C,G,Z | 3  | -     | 23  | 149997 | 656394 | 1734632 |
| SAMN07154303 | 20162411 | MN | 89 | 101 | 89 | + | enn, mrp | fbaA, prtF2, sfb1, sof | - | - | - | - | + | + | C,G,Z | 3  | -     | 78  | 102988 | 621738 | 1767396 |
| SAMN07154310 | 20162418 | MN | 89 | 101 | 89 | + | enn, mrp | fbaA, prtF2, sfb1, sof | - | - | - | - | + | + | G,Z   | 16 | -     | 32  | 155848 | 385951 | 1697578 |
| SAMN07154313 | 20162421 | MN | 89 | 101 | 89 | + | enn, mrp | fbaA, prtF2, sfb1, sof | - | - | - | - | + | + | G,Z   | 3  | -     | 53  | 60205  | 232215 | 1694929 |
| SAMN07154321 | 20162429 | MN | 89 | 101 | 89 | + | enn, mrp | fbaA, prtF2, sfb1, sof | - | - | - | - | + | + | G,Z   | 3  | -     | 25  | 155742 | 386076 | 1695866 |
| SAMN07154325 | 20162595 | NM | 89 | 101 | 89 | + | enn, mrp | fbaA, prtF2, sfb1, sof | - | - | - | - | + | + | C,G,Z | 3  | -     | 37  | 155797 | 412421 | 1723599 |
| SAMN07154335 | 20162635 | CO | 89 | 101 | 89 | + | enn, mrp | fbaA, prtF2, sfb1, sof | - | - | - | - | + | + | G,Z   | 3  | -     | 31  | 156137 | 386261 | 1720427 |
| SAMN07154336 | 20162636 | CO | 89 | 101 | 89 | + | enn, mrp | fbaA, prtF2, sfb1, sof | - | - | - | - | + | + | C,G,Z | 3  | -     | 33  | 163022 | 656400 | 1722025 |
| SAMN07154341 | 20162641 | CO | 89 | 101 | 89 | + | enn, mrp | fbaA, prtF2, sfb1, sof | - | - | - | - | + | + | C,G,Z | 3  | ermTR | 33  | 156137 | 485279 | 1793670 |
| SAMN07154346 | 20162646 | CO | 89 | 101 | 89 | - | enn, mrp | fbaA, prtF2, sfb1, sof | - | - | - | - | + | + | C,G,Z | 3  | -     | 35  | 163038 | 412702 | 1722649 |
| SAMN07154351 | 20162651 | CO | 89 | 101 | 89 | + | enn, mrp | fbaA, prtF2, sfb1, sof | - | - | - | - | + | + | C,G,Z | 3  | -     | 33  | 116237 | 656483 | 1724097 |
| SAMN07154352 | 20162652 | CO | 89 | 101 | 89 | + | enn, mrp | fbaA, prtF2, sfb1, sof | - | - | - | - | + | + | C,G,Z | 3  | -     | 112 | 116065 | 511637 | 1736942 |

|              |          |    |       |     |    |   |                 |                               |   |   |   |   |   |   |         |   |                                             |     |        |        |         |
|--------------|----------|----|-------|-----|----|---|-----------------|-------------------------------|---|---|---|---|---|---|---------|---|---------------------------------------------|-----|--------|--------|---------|
| SAMN07154359 | 20162659 | CO | 89    | 101 | 89 | + | <i>enn, mrp</i> | <i>fbaA, prtF2, sfb1, sof</i> | - | - | - | - | + | + | C,G,Z   | 3 | -                                           | 31  | 155739 | 412645 | 1723664 |
| SAMN07154366 | 20162666 | CO | 89    | 101 | 89 | + | <i>enn, mrp</i> | <i>fbaA, prtF2, sfb1, sof</i> | - | - | - | - | + | + | C,G,Z   | 3 | -                                           | 40  | 162829 | 412275 | 1712770 |
| SAMN07154371 | 20162671 | CO | 89    | 101 | 89 | + | <i>enn, mrp</i> | <i>fbaA, prtF2, sfb1, sof</i> | - | - | - | - | + | + | C,G,Z   | 3 | -                                           | 101 | 32220  | 86885  | 1731446 |
| SAMN07154377 | 20162682 | CO | 89    | 101 | 89 | + | <i>enn, mrp</i> | <i>fbaA, prtF2, sfb1, sof</i> | - | - | - | - | + | + | C,G,Z   | 3 | -                                           | 42  | 156093 | 487532 | 1746695 |
| SAMN07154392 | 20163515 | NM | 89    | 101 | 89 | + | <i>enn, mrp</i> | <i>fbaA, prtF2, sfb1, sof</i> | - | - | - | - | + | + | C,G,Z   | 3 | -                                           | 31  | 139868 | 244037 | 1721297 |
| SAMN07154398 | 20163960 | MN | 89    | 101 | 89 | + | <i>enn, mrp</i> | <i>fbaA, prtF2, sfb1, sof</i> | - | - | - | - | + | + | G,Z     | 3 | -                                           | 23  | 155837 | 385775 | 1694072 |
| SAMN07154402 | 20164742 | TN | 89    | 101 | 89 | + | <i>enn, mrp</i> | <i>fbaA, prtF2, sfb1, sof</i> | - | - | - | - | + | + | G,Z     | 3 | -                                           | 84  | 155770 | 545254 | 1705275 |
| SAMN07153108 | 20153102 | NY | 89    | 407 | 11 | + | <i>enn, mrp</i> | <i>fbaA, prtF2, sfb1, sof</i> | + | - | - | - | - | + | C,G,Z   | 3 | <i>ermTR, gyrA-S11F, parC-S6F, aadD</i>     | 37  | 90207  | 285448 | 1780332 |
| SAMN07153317 | 20154547 | CT | 89    | 407 | 11 | + | <i>enn, mrp</i> | <i>fbaA, prtF2, sfb1, sof</i> | + | - | - | - | - | + | C,G,Z   | 3 | -                                           | 39  | 112501 | 251125 | 1747693 |
| SAMN07153519 | 20155360 | CT | 89    | 407 | 11 | + | <i>enn, mrp</i> | <i>fbaA, prtF2, sfb1, sof</i> | + | - | - | - | - | + | C,G,Z   | 3 | -                                           | 34  | 112537 | 251352 | 1748132 |
| SAMN07153573 | 20155581 | TN | 89    | 407 | 11 | + | <i>enn, mrp</i> | <i>fbaA, prtF2, sfb1, sof</i> | + | - | - | - | - | + | C,G,Z   | 3 | -                                           | 47  | 83339  | 350064 | 1765740 |
| SAMN07153338 | 20154591 | TN | 89    | 801 | 89 | + | <i>enn, mrp</i> | <i>fbaA, prtF2, sfb1, sof</i> | - | - | - | - | + | + | C,G,Z   | 3 | -                                           | 25  | 155764 | 412447 | 1715649 |
| SAMN07153546 | 20155387 | OR | 89    | 860 | 89 | + | <i>enn, mrp</i> | <i>fbaA, prtF2, sfb1, sof</i> | - | - | - | - | + | + | C,G,Z   | 3 | -                                           | 24  | 156440 | 451565 | 1755872 |
| SAMN07154030 | 20160944 | CT | 89    | 892 | 89 | + | <i>enn, mrp</i> | <i>fbaA, prtF2, sfb1, sof</i> | - | - | - | - | + | + | C,G,Z   | 3 | <i>tetM</i>                                 | 28  | 163005 | 412423 | 1734387 |
| SAMN07154003 | 20160749 | MD | 89.1  | 407 | 11 | + | <i>enn, mrp</i> | <i>fbaA, prtF2, sfb1, sof</i> | + | - | - | - | - | + | G,Z     | 3 | -                                           | 35  | 116213 | 266495 | 1724225 |
| SAMN07153334 | 20154565 | CT | 89.1  | 910 | 11 | + | <i>enn, mrp</i> | <i>fbaA, prtF2, sfb1, sof</i> | + | - | - | - | - | + | C,G,Z   | 3 | -                                           | 42  | 163293 | 416605 | 1777060 |
| SAMN07152986 | 20152230 | NY | 89.24 | 101 | 89 | + | <i>enn, mrp</i> | <i>fbaA, prtF2, sfb1, sof</i> | - | - | - | - | + | + | C,G,Z   | 3 | -                                           | 32  | 112038 | 335976 | 1732681 |
| SAMN07153579 | 20155587 | TN | 89.28 | 101 | 89 | + | <i>enn, mrp</i> | <i>fbaA, prtF2, sfb1, sof</i> | - | - | - | - | + | + | C,G,Z   | 3 | -                                           | 31  | 144965 | 267650 | 1717226 |
| SAMN07154021 | 20160932 | TN | 89.28 | 101 | 89 | + | <i>enn, mrp</i> | <i>fbaA, prtF2, sfb1, sof</i> | - | - | - | - | + | + | C,G,Z   | 3 | -                                           | 35  | 112089 | 243931 | 1720868 |
| SAMN07154135 | 20161336 | NM | 89.28 | 101 | 89 | + | <i>enn, mrp</i> | <i>fbaA, prtF2, sfb1, sof</i> | - | - | - | - | + | + | G,Z     | 3 | -                                           | 44  | 162858 | 385885 | 1690761 |
| SAMN07154213 | 20161833 | OR | 90.2  | 184 | 13 | + | <i>enn, mrp</i> | <i>fbaA, prtF2, sfb1, sof</i> | + | - | - | - | - | + | G,Z     | 1 | <i>tetM</i>                                 | 25  | 127822 | 243618 | 1733758 |
| SAMN07153105 | 20153098 | TN | 90.2  | 184 | 13 | + | <i>enn, mrp</i> | <i>fbaA, prtF2, sfb1, sof</i> | + | - | - | - | - | + | C,G,I,Z | 1 | <i>tetM, parC-S6F</i>                       | 42  | 98962  | 191990 | 1822619 |
| SAMN07154141 | 20161425 | MN | 90.2  | 184 | 13 | + | <i>enn, mrp</i> | <i>fbaA, prtF2, sfb1, sof</i> | + | - | - | - | - | + | C,G,Z   | 1 | <i>tetM</i>                                 | 30  | 274593 | 484264 | 1885368 |
| SAMN07154244 | 20162110 | CA | 90.5  | 184 | 13 | + | <i>enn, mrp</i> | <i>fbaA, prtF2, sfb1, sof</i> | + | - | - | - | - | + | G,Z     | 1 | <i>tetM</i>                                 | 135 | 235927 | 627983 | 1767551 |
| SAMN07154369 | 20162669 | CO | 90.5  | 184 | 13 | + | <i>enn, mrp</i> | <i>fbaA, prtF2, sfb1, sof</i> | + | - | - | - | - | + | G,Z     | 1 | <i>tetM</i>                                 | 65  | 188144 | 444037 | 1747815 |
| SAMN07153808 | 20156597 | OR | 91    | 12  | 91 | + | <i>enn, mrp</i> | <i>fbaA, prtF2</i>            | + | - | - | - | - | - | G,S,Z   | 1 | -                                           | 51  | 170886 | 270145 | 1756217 |
| SAMN07154041 | 20160955 | OR | 91    | 12  | 91 | + | <i>enn, mrp</i> | <i>fbaA, prtF2</i>            | + | - | - | - | - | - | G,S,Z   | 1 | -                                           | 43  | 170938 | 327982 | 1757763 |
| SAMN07154108 | 20161200 | OR | 91    | 12  | 91 | + | <i>enn, mrp</i> | <i>fbaA, prtF2</i>            | + | - | - | - | - | - | G,S,Z   | 1 | -                                           | 45  | 170918 | 327971 | 1758220 |
| SAMN07154027 | 20160940 | TN | 92    | 82  | 92 | + | <i>enn, mrp</i> | <i>fbaA, sfb1, sof</i>        | + | - | - | - | - | - | C,G,I,Z | 1 | <i>ermT, tetM, ant6-la, aph3-III, sat4A</i> | 32  | 101718 | 232188 | 1810555 |
| SAMN07153000 | 20152303 | OR | 92    | 82  | 92 | + | <i>enn, mrp</i> | <i>fbaA, sfb1, sof</i>        | + | - | - | - | - | - | C,G,I,Z | 1 | <i>ermT, tetM, ant6-la, aph3-III, sat4A</i> | 87  | 40377  | 94068  | 1817496 |
| SAMN07153031 | 20152740 | NM | 92    | 82  | 92 | + | <i>enn, mrp</i> | <i>fbaA, sfb1, sof</i>        | + | - | - | - | - | - | C,G,I,Z | 1 | <i>ermT, tetM, ant6-la, aph3-III, sat4A</i> | 36  | 94783  | 211528 | 1815804 |
| SAMN07153136 | 20153532 | OR | 92    | 82  | 92 | + | <i>enn, mrp</i> | <i>fbaA, sfb1, sof</i>        | + | - | - | - | - | - | C,G,I,Z | 1 | <i>ermT, tetM, ant6-la, aph3-III, sat4A</i> | 33  | 124627 | 243732 | 1814406 |
| SAMN07153192 | 20153621 | CO | 92    | 82  | 92 | + | <i>enn, mrp</i> | <i>fbaA, sfb1, sof</i>        | + | - | - | - | - | - | C,G,I,Z | 1 | <i>ermT, tetM, ant6-la, aph3-III, sat4A</i> | 29  | 124607 | 243712 | 1813114 |
| SAMN07153205 | 20154014 | CA | 92    | 82  | 92 | + | <i>enn, mrp</i> | <i>fbaA, sfb1, sof</i>        | + | - | - | - | - | - | C,G,I,Z | 1 | <i>ermT, tetM, ant6-la, aph3-III, sat4A</i> | 32  | 94823  | 243699 | 1813243 |
| SAMN07153226 | 20154036 | CA | 92    | 82  | 92 | + | <i>enn, mrp</i> | <i>fbaA, sfb1, sof</i>        | + | - | - | - | - | - | C,G,I,Z | 1 | <i>ermT, tetM, ant6-la, aph3-III, sat4A</i> | 30  | 124596 | 243700 | 1806532 |
| SAMN07153228 | 20154038 | CA | 92    | 82  | 92 | + | <i>enn, mrp</i> | <i>fbaA, sfb1, sof</i>        | + | - | - | - | - | - | C,G,I,Z | 1 | <i>ermT, tetM, ant6-la, aph3-III, sat4A</i> | 37  | 177765 | 367425 | 1799585 |
| SAMN07153243 | 20154053 | CA | 92    | 82  | 92 | + | <i>enn, mrp</i> | <i>fbaA, sfb1, sof</i>        | + | - | - | - | - | - | C,G,I,Z | 1 | <i>ermT, tetM, ant6-la, aph3-III, sat4A</i> | 29  | 124591 | 243696 | 1812681 |
| SAMN07153244 | 20154054 | CA | 92    | 82  | 92 | + | <i>enn, mrp</i> | <i>fbaA, sfb1, sof</i>        | + | - | - | - | - | - | C,G,I,Z | 1 | <i>ermT, tetM, ant6-la, aph3-III, sat4A</i> | 40  | 124631 | 243736 | 1810387 |
| SAMN07153308 | 20154382 | OR | 92    | 82  | 92 | + | <i>enn, mrp</i> | <i>fbaA, sfb1, sof</i>        | + | - | - | - | - | - | C,G,I,Z | 1 | <i>ermT, tetM, ant6-la, aph3-III, sat4A</i> | 48  | 177729 | 367394 | 1803801 |
| SAMN07153387 | 20154789 | CO | 92    | 82  | 92 | + | <i>enn, mrp</i> | <i>fbaA, sfb1, sof</i>        | + | - | - | - | - | - | C,G,I,Z | 1 | <i>ermT, tetM, ant6-la, aph3-III</i>        | 29  | 124599 | 243704 | 1807546 |
| SAMN07153389 | 20154791 | CO | 92    | 82  | 92 | + | <i>enn, mrp</i> | <i>fbaA, sfb1, sof</i>        | + | - | - | - | - | - | C,G,I,Z | 1 | <i>ermT, tetM, ant6-la, aph3-III, sat4A</i> | 33  | 118829 | 243700 | 1808401 |
| SAMN07153407 | 20154810 | CO | 92    | 82  | 92 | + | <i>enn, mrp</i> | <i>fbaA, sfb1, sof</i>        | + | - | - | - | - | - | C,G,I,Z | 1 | <i>ermT, tetM, ant6-la, aph3-III, sat4A</i> | 32  | 124627 | 243732 | 1808871 |
| SAMN07153414 | 20154818 | CO | 92    | 82  | 92 | + | <i>enn, mrp</i> | <i>fbaA, sfb1, sof</i>        | + | - | - | - | - | - | C,G,I,Z | 1 | <i>ermT, tetM, ant6-la, aph3-III, sat4A</i> | 38  | 92421  | 201494 | 1809993 |
| SAMN07153549 | 20155390 | OR | 92    | 82  | 92 | + | <i>enn, mrp</i> | <i>fbaA, sfb1, sof</i>        | + | - | - | - | - | - | C,G,I,Z | 1 | <i>ermT, tetM, ant6-la, aph3-III, sat4A</i> | 30  | 124587 | 232211 | 1858899 |
| SAMN07153718 | 20156269 | OR | 92    | 82  | 92 | + | <i>enn, mrp</i> | <i>fbaA, sfb1, sof</i>        | + | - | - | - | - | - | C,G,I,Z | 1 | <i>tetM, ant6-la, aph3-III</i>              | 30  | 124602 | 243716 | 1802579 |

|              |          |    |      |     |    |   |                                  |   |   |   |   |   |   |         |    |                                                    |     |        |        |         |
|--------------|----------|----|------|-----|----|---|----------------------------------|---|---|---|---|---|---|---------|----|----------------------------------------------------|-----|--------|--------|---------|
| SAMN07153721 | 20156272 | OR | 92   | 82  | 92 | + | <i>enn, mrp fbaA, sfb1, sof</i>  | + | - | - | - | - | - | C,G,I,Z | 1  | <i>ermT, tetM, ant6-la, aph3-III, sat4A</i>        | 40  | 189034 | 367650 | 1802905 |
| SAMN07153737 | 20156390 | CA | 92   | 82  | 92 | + | <i>enn, mrp fbaA, sfb1, sof</i>  | + | - | - | - | - | - | C,G,I,Z | 1  | <i>ermT, tetM, ant6-la, aph3-III, sat4A</i>        | 38  | 188963 | 367410 | 1799947 |
| SAMN07153750 | 20156403 | CA | 92   | 82  | 92 | + | <i>enn, mrp fbaA, sfb1, sof</i>  | + | - | - | - | - | - | C,G,I,Z | 1  | -                                                  | 31  | 124620 | 243723 | 1773091 |
| SAMN07153764 | 20156420 | CA | 92   | 82  | 92 | + | <i>enn, mrp fbaA, sfb1, sof</i>  | + | - | - | - | - | - | C,G,I,Z | 1  | <i>ermT, tetM, ant6-la, aph3-III, sat4A</i>        | 35  | 124611 | 243716 | 1808475 |
| SAMN07153765 | 20156421 | CA | 92   | 82  | 92 | + | <i>enn, mrp fbaA, sfb1, sof</i>  | + | - | - | - | - | - | C,G,I,Z | 1  | <i>ermT, tetM, ant6-la, aph3-III, sat4A</i>        | 32  | 124579 | 243684 | 1807383 |
| SAMN07153777 | 20156433 | CA | 92   | 82  | 92 | + | <i>enn, mrp fbaA, sfb1, sof</i>  | + | - | - | - | - | - | C,G,I,Z | 1  | <i>ermT, tetM, ant6-la, aph3-III, sat4A</i>        | 40  | 111950 | 243680 | 1808124 |
| SAMN07153785 | 20156441 | CA | 92   | 82  | 92 | + | <i>enn, mrp fbaA, sfb1, sof</i>  | + | - | - | - | - | - | C,G,I,Z | 1  | <i>ermT, tetM, ant6-la, aph3-III, sat4A</i>        | 42  | 94782  | 243732 | 1810335 |
| SAMN07153805 | 20156594 | OR | 92   | 82  | 92 | + | <i>enn, mrp fbaA, sfb1, sof</i>  | + | - | - | - | - | - | C,G,I,Z | 1  | <i>ermT, tetM, ant6-la, aph3-III, sat4A</i>        | 32  | 177837 | 279809 | 1805083 |
| SAMN07153881 | 20160007 | CO | 92   | 82  | 92 | + | <i>enn, mrp fbaA, sfb1, sof</i>  | + | - | - | - | - | - | C,G,I,Z | 1  | <i>ermT, tetM, ant6-la, aph3-III, sat4A</i>        | 111 | 177433 | 344860 | 1800891 |
| SAMN07153886 | 20160013 | CO | 92   | 82  | 92 | + | <i>enn, mrp fbaA, sfb1, sof</i>  | + | - | - | - | - | - | C,G,I,Z | 1  | <i>ermT, tetM, ant6-la, aph3-III, sat4A</i>        | 91  | 177657 | 345016 | 1800971 |
| SAMN07153892 | 20160019 | CO | 92   | 82  | 92 | + | <i>enn, mrp fbaA, sfb1, sof</i>  | + | - | - | - | - | - | C,G,I,Z | 1  | <i>ermT, tetM, ant6-la, aph3-III, sat4A</i>        | 35  | 124634 | 244591 | 1812001 |
| SAMN07153896 | 20160023 | CO | 92   | 82  | 92 | + | <i>enn, mrp fbaA, sfb1, sof</i>  | + | - | - | - | - | - | C,G,I,Z | 1  | <i>ermT, tetM, ant6-la, aph3-III, sat4A</i>        | 37  | 124523 | 243628 | 1812661 |
| SAMN07153942 | 20160247 | OR | 92   | 82  | 92 | + | <i>enn, mrp fbaA, sfb1, sof</i>  | + | - | - | - | - | - | C,G,I,Z | 1  | <i>ermT, tetM, ant6-la, aph3-III, sat4A</i>        | 27  | 102483 | 243708 | 1808515 |
| SAMN07153953 | 20160249 | OR | 92   | 82  | 92 | + | <i>enn, mrp fbaA, sfb1, sof</i>  | + | - | - | - | - | - | C,G,I,Z | 1  | <i>ermT, tetM, ant6-la, aph3-III, sat4A</i>        | 36  | 94792  | 243744 | 1809655 |
| SAMN07153954 | 20160250 | OR | 92   | 82  | 92 | + | <i>enn, mrp fbaA, sfb1, sof</i>  | + | - | - | - | - | - | C,G,I,Z | 1  | <i>ermT, tetM, ant6-la, aph3-III, sat4A</i>        | 27  | 124607 | 243712 | 1803114 |
| SAMN07153955 | 20160251 | OR | 92   | 82  | 92 | + | <i>enn, mrp fbaA, sfb1, sof</i>  | + | - | - | - | - | - | C,G,I,Z | 1  | <i>ermT, tetM, ant6-la, aph3-III, sat4A</i>        | 28  | 124607 | 243712 | 1802494 |
| SAMN07153979 | 20160450 | GA | 92   | 82  | 92 | + | <i>enn, mrp fbaA, sfb1, sof</i>  | + | - | - | - | - | - | C,G,I,Z | 1  | <i>ermT, tetM, ant6-la, aph3-III, sat4A</i>        | 34  | 94750  | 243663 | 1813417 |
| SAMN07154024 | 20160936 | TN | 92   | 82  | 92 | + | <i>enn, mrp fbaA, sfb1, sof</i>  | + | - | - | - | - | - | C,G,I,Z | 1  | <i>ermT, tetM, ant6-la, aph3-III, sat4A</i>        | 30  | 178325 | 243684 | 1809207 |
| SAMN07154040 | 20160954 | OR | 92   | 82  | 92 | + | <i>enn, mrp fbaA, sfb1, sof</i>  | + | - | - | - | - | - | C,G,I,Z | 1  | <i>tetM, ant6-la, aph3-III, sat4A</i>              | 29  | 177961 | 280268 | 1801550 |
| SAMN07154077 | 20161071 | CO | 92   | 82  | 92 | + | <i>enn, mrp fbaA, sfb1, sof</i>  | + | - | - | - | - | - | C,G,I,Z | 1  | <i>ermT, tetM, ant6-la, aph3-III, sat4A</i>        | 31  | 124595 | 243700 | 1807956 |
| SAMN07154079 | 20161073 | CO | 92   | 82  | 92 | + | <i>enn, mrp fbaA, sfb1, sof</i>  | + | - | - | - | - | - | C,G,I,Z | 1  | <i>ermT, tetM, ant6-la, aph3-III, sat4A</i>        | 32  | 124611 | 243716 | 1807968 |
| SAMN07154087 | 20161081 | CO | 92   | 82  | 92 | + | <i>enn, mrp fbaA, sfb1, sof</i>  | + | - | - | - | - | - | C,G,I,Z | 1  | <i>ermT, tetM, ant6-la, aph3-III, sat4A</i>        | 30  | 124583 | 243688 | 1807845 |
| SAMN07154091 | 20161085 | CO | 92   | 82  | 92 | + | <i>enn, mrp fbaA, sfb1, sof</i>  | + | - | - | - | - | - | C,G,I,Z | 1  | <i>ermT, tetM, ant6-la, aph3-III, sat4A</i>        | 33  | 112048 | 243740 | 1808604 |
| SAMN07154096 | 20161090 | CO | 92   | 82  | 92 | + | <i>enn, mrp fbaA, sfb1, sof</i>  | + | - | - | - | - | - | C,G,I,Z | 1  | <i>ermT, tetM, ant6-la, aph3-III, sat4A</i>        | 33  | 124627 | 243732 | 1809108 |
| SAMN07154104 | 20161196 | OR | 92   | 82  | 92 | + | <i>enn, mrp fbaA, sfb1, sof</i>  | + | - | - | - | - | - | C,G,I,Z | 1  | <i>ermT, tetM, ant6-la, aph3-III, sat4A</i>        | 36  | 94775  | 243739 | 1810773 |
| SAMN07154114 | 20161206 | OR | 92   | 82  | 92 | + | <i>enn, mrp fbaA, sfb1, sof</i>  | + | - | - | - | - | - | C,G,I,Z | 1  | <i>ermT, tetM, ant6-la, aph3-III, sat4A</i>        | 30  | 177969 | 273039 | 1807004 |
| SAMN07154214 | 20161834 | OR | 92   | 82  | 92 | + | <i>enn, mrp fbaA, sfb1, sof</i>  | + | - | - | - | - | - | C,G,I,Z | 1  | <i>tetM, ant6-la, aph3-III, sat4A</i>              | 34  | 110883 | 243700 | 1804656 |
| SAMN07154235 | 20161874 | TN | 92   | 82  | 92 | + | <i>enn, mrp fbaA, sfb1, sof</i>  | + | - | - | - | - | - | C,G,I,Z | 1  | <i>ermT, tetM, ant6-la, aph3-III, sat4A</i>        | 33  | 177865 | 367694 | 1806194 |
| SAMN07154247 | 20162114 | CA | 92   | 82  | 92 | + | <i>enn, mrp fbaA, sfb1, sof</i>  | + | - | - | - | - | - | C,G,I,Z | 1  | <i>ermT, tetM, ant6-la, aph3-III, sat4A</i>        | 29  | 177885 | 367729 | 1805386 |
| SAMN07154252 | 20162119 | CA | 92   | 82  | 92 | + | <i>enn, mrp fbaA, sfb1, sof</i>  | + | - | - | - | - | - | C,G,I,Z | 1  | <i>ermT, tetM, ant6-la, aph3-III, sat4A</i>        | 37  | 177753 | 367488 | 1799384 |
| SAMN07154262 | 20162129 | CA | 92   | 82  | 92 | + | <i>enn, mrp fbaA, sfb1, sof</i>  | + | - | - | - | - | - | C,G,I,Z | 1  | <i>ermT, tetM, ant6-la, aph3-III, sat4A</i>        | 35  | 135678 | 243636 | 1806855 |
| SAMN07154264 | 20162131 | CA | 92   | 82  | 92 | + | <i>enn, mrp fbaA, sfb1, sof</i>  | + | - | - | - | - | - | C,G,I,Z | 1  | <i>ermT, tetM, ant6-la, aph3-III, sat4A</i>        | 29  | 177806 | 367766 | 1807060 |
| SAMN07154265 | 20162132 | CA | 92   | 82  | 92 | + | <i>enn, mrp fbaA, sfb1, sof</i>  | + | - | - | - | - | - | C,G,I,Z | 1  | <i>ermT, tetM, ant6-la, aph3-III, sat4A</i>        | 32  | 135731 | 243684 | 1812763 |
| SAMN07154275 | 20162142 | CA | 92   | 82  | 92 | + | <i>enn, mrp fbaA, sfb1, sof</i>  | + | - | - | - | - | - | C,G,I,Z | 1  | <i>tetM, ant6-la, aph3-III, sat4A</i>              | 29  | 178265 | 367745 | 1811916 |
| SAMN07154285 | 20162153 | CA | 92   | 82  | 92 | + | <i>enn, mrp fbaA, sfb1, sof</i>  | + | - | - | - | - | - | C,G,I,Z | 1  | <i>ermT, tetM, ant6-la, aph3-III, sat4A</i>        | 30  | 178297 | 367777 | 1859911 |
| SAMN07154330 | 20162630 | CO | 92   | 82  | 92 | + | <i>enn, mrp fbaA, sfb1, sof</i>  | + | - | - | - | - | - | C,G,I,Z | 1  | <i>ermT, tetM, ant6-la, aph3-III, sat4A</i>        | 34  | 135682 | 243672 | 1813025 |
| SAMN07154332 | 20162632 | CO | 92   | 82  | 92 | + | <i>enn, mrp fbaA, sfb1, sof</i>  | + | - | - | - | - | - | C,G,I,Z | 1  | <i>ermT, tetM, ant6-la, aph3-III, sat4A</i>        | 44  | 177885 | 367714 | 1813763 |
| SAMN07154361 | 20162661 | CO | 92   | 82  | 92 | + | <i>enn, mrp fbaA, sfb1, sof</i>  | + | - | - | - | - | - | C,G,I,Z | 1  | <i>ermT, tetM, ant6-la, aph3-III, sat4A</i>        | 35  | 176436 | 273105 | 1805911 |
| SAMN07154390 | 20163342 | OR | 92   | 82  | 92 | + | <i>enn, mrp fbaA, sfb1, sof</i>  | + | - | - | - | - | - | C,G,I,Z | 1  | <i>ermT, tetM, ant6-la, aph3-III, sat4A</i>        | 189 | 84043  | 174416 | 1812289 |
| SAMN07153245 | 20154055 | CA | 92   | 855 | 92 | + | <i>enn, mrp fbaA, sfb1, sof</i>  | + | - | - | - | - | - | C,G,I,Z | 1  | <i>ermT, tetM, ant6-la, aph3-III, sat4A</i>        | 30  | 124551 | 243656 | 1806627 |
| SAMN07153801 | 20156457 | CA | 92.2 | 82  | 92 | + | <i>enn, mrp fbaA, sfb1, sof</i>  | + | - | - | - | - | - | C,G,I,Z | 1  | <i>ermT, ermTR, tetM, ant6-la, aph3-III, sat4A</i> | 34  | 124559 | 273194 | 1835229 |
| SAMN07153070 | 20152838 | GA | 94   | 89  | 89 | + | <i>enn, mrp fbaA, prtF2, sof</i> | + | - | - | - | - | + | G,H,Z   | 1  | -                                                  | 40  | 163523 | 421437 | 1825883 |
| SAMN07153464 | 20155042 | MN | 101  | 182 | 13 | + | <i>enn, mrp fbaA, prtF2</i>      | + | + | - | - | - | - | G,I,K,Z | 14 | -                                                  | 24  | 216587 | 414003 | 1767840 |
| SAMN07153686 | 20156165 | MN | 101  | 182 | 13 | + | <i>enn, mrp fbaA, prtF2</i>      | + | + | - | - | - | - | G,I,K,Z | 14 | <i>tetM, ant6-la, aph3-III, sat4A</i>              | 29  | 171549 | 288336 | 1830797 |
| SAMN07153972 | 20160329 | MN | 101  | 182 | 13 | + | <i>enn, mrp fbaA, prtF2</i>      | + | + | - | - | - | - | G,I,K,Z | 14 | -                                                  | 26  | 144250 | 287961 | 1766693 |

|              |          |    |       |     |    |   |                 |                               |  |  |  |  |  |  |  |  |  |  |               |    |   |                                       |     |        |        |         |
|--------------|----------|----|-------|-----|----|---|-----------------|-------------------------------|--|--|--|--|--|--|--|--|--|--|---------------|----|---|---------------------------------------|-----|--------|--------|---------|
| SAMN07154308 | 20162416 | MN | 101   | 182 | 13 | + | <i>enn, mrp</i> | <i>fbaA, prtF2</i>            |  |  |  |  |  |  |  |  |  |  | G,J,K,Z       | 14 | - |                                       | 35  | 171494 | 288187 | 1771757 |
| SAMN07154374 | 20162674 | CO | 101   | 182 | 13 | + | <i>enn, mrp</i> | <i>fbaA, prtF2</i>            |  |  |  |  |  |  |  |  |  |  | G,J,K,Z       | 14 |   | <i>tetM, ant6-la, aph3-III, sat4A</i> | 38  | 148092 | 288239 | 1833512 |
| SAMN07153848 | 20156725 | CT | 102.2 | 895 | -  | + | <i>enn, mrp</i> | <i>fbaA, sfb1, sof</i>        |  |  |  |  |  |  |  |  |  |  | C,G,J,L,M,Z   | 1  |   | <i>ermB, tetM</i>                     | 102 | 33433  | 101197 | 1979660 |
| SAMN07154418 | 20164926 | CO | 103   | 327 | -  | + | <i>enn, mrp</i> | <i>fbaA, prtF2, sfb1, sof</i> |  |  |  |  |  |  |  |  |  |  | G,H,I,Z       | 1  |   |                                       | 56  | 82613  | 163059 | 1783669 |
| SAMN07153747 | 20156400 | CA | 104   | 137 | 11 | + | <i>enn, mrp</i> | <i>fbaA, prtF2, sfb1, sof</i> |  |  |  |  |  |  |  |  |  |  | L,M,Z         | 1  |   | <i>tetM</i>                           | 20  | 257935 | 517799 | 1857647 |
| SAMN07153792 | 20156448 | CA | 104   | 137 | 11 | + | <i>enn, mrp</i> | <i>fbaA, prtF2, sfb1, sof</i> |  |  |  |  |  |  |  |  |  |  | L,M,Z         | 1  |   | <i>tetM</i>                           | 55  | 64325  | 180683 | 1865369 |
| SAMN07153332 | 20154563 | CT | 106   | 338 | 3  | + | <i>enn, mrp</i> | <i>fbaA, prtF2, sfb1, sof</i> |  |  |  |  |  |  |  |  |  |  | G,Z           | 1  |   | <i>tetM</i>                           | 24  | 202323 | 278290 | 1718521 |
| SAMN07154182 | 20161543 | GA | 106   | 900 | 59 | + | <i>enn, mrp</i> | <i>fbaA, prtF2, sfb1, sof</i> |  |  |  |  |  |  |  |  |  |  | G,Z           | 1  |   |                                       | 41  | 82358  | 248251 | 1712266 |
| SAMN07153987 | 20160491 | NM | 108.1 | 14  | -  | + | <i>enn, mrp</i> | <i>fbaA, sfb1</i>             |  |  |  |  |  |  |  |  |  |  | C,G,I,L,M,S,Z | 1  |   | <i>tetM, folA-H11D</i>                | 76  | 183603 | 255119 | 1908454 |
| SAMN07153232 | 20154042 | CA | 108.2 | 14  | -  | + | <i>enn, mrp</i> | <i>fbaA, sfb1</i>             |  |  |  |  |  |  |  |  |  |  | G,I,L,M,S,Z   | 1  |   | <i>tetM, folA-H11D</i>                | 66  | 93258  | 380570 | 1859602 |
| SAMN07153976 | 20160333 | MN | 111.1 | 214 | 91 | + | <i>enn, mrp</i> | <i>fbaA, prtF2</i>            |  |  |  |  |  |  |  |  |  |  | G,I,S,Z       | 1  |   |                                       | 25  | 177578 | 217729 | 1755126 |
| SAMN07153201 | 20154010 | CA | 113.2 | 148 | 12 | + | <i>enn, mrp</i> | <i>fbaA, prtF2, sfb1, sof</i> |  |  |  |  |  |  |  |  |  |  | G,Z           | 1  |   |                                       | 52  | 157184 | 316103 | 1793563 |
| SAMN07153706 | 20156185 | MN | 114.6 | 220 | 13 | + | <i>enn, mrp</i> | <i>fbaA, prtF2, sfb1, sof</i> |  |  |  |  |  |  |  |  |  |  | G,Z           | 1  |   | <i>tetM</i>                           | 26  | 228567 | 289839 | 1723285 |
| SAMN07153352 | 20154605 | TN | 114.8 | 188 | 81 | + | <i>enn, mrp</i> | <i>fbaA, prtF2, sfb1, sof</i> |  |  |  |  |  |  |  |  |  |  | G,Z           | 1  |   | <i>ermTR, tetM, aph3-III, sat4A</i>   | 31  | 127366 | 320321 | 1787320 |
| SAMN07153890 | 20160017 | CO | 118   | 167 | 13 | + | <i>enn, mrp</i> | <i>fbaA, prtF2, sfb1, sof</i> |  |  |  |  |  |  |  |  |  |  | C,G,Z         | 1  |   |                                       | 28  | 243664 | 684679 | 1770134 |
| SAMN07154193 | 20161727 | MD | 118   | 167 | 13 | + | <i>enn, mrp</i> | <i>fbaA, prtF2, sfb1, sof</i> |  |  |  |  |  |  |  |  |  |  | C,G,Z         | 1  |   |                                       | 24  | 243543 | 772815 | 1769217 |
| SAMN07153044 | 20152754 | NM | 118   | 167 | 13 | + | <i>enn, mrp</i> | <i>fbaA, prtF2, sfb1, sof</i> |  |  |  |  |  |  |  |  |  |  | C,G,Z         | 1  |   |                                       | 26  | 199371 | 248902 | 1778944 |
| SAMN07153080 | 20152979 | OR | 118   | 167 | 13 | + | <i>enn, mrp</i> | <i>fbaA, prtF2, sfb1, sof</i> |  |  |  |  |  |  |  |  |  |  | C,G,Z         | 1  |   |                                       | 23  | 233374 | 417619 | 1777775 |
| SAMN07153095 | 20153048 | GA | 118   | 167 | 13 | + | <i>enn, mrp</i> | <i>fbaA, prtF2, sfb1, sof</i> |  |  |  |  |  |  |  |  |  |  | C,G,Z         | 1  |   |                                       | 16  | 275529 | 774338 | 1775768 |
| SAMN07153113 | 20153107 | NY | 118   | 167 | 13 | + | <i>enn, mrp</i> | <i>fbaA, prtF2, sfb1, sof</i> |  |  |  |  |  |  |  |  |  |  | C,G,Z         | 1  |   |                                       | 18  | 243635 | 774058 | 1770366 |
| SAMN07153137 | 20153533 | OR | 118   | 167 | 13 | + | <i>enn, mrp</i> | <i>fbaA, prtF2, sfb1, sof</i> |  |  |  |  |  |  |  |  |  |  | C,G,Z         | 1  |   |                                       | 74  | 243410 | 434119 | 1771773 |
| SAMN07153260 | 20154142 | MN | 118   | 167 | 13 | + | <i>enn, mrp</i> | <i>fbaA, prtF2, sfb1, sof</i> |  |  |  |  |  |  |  |  |  |  | C,G,Z         | 1  |   |                                       | 20  | 243615 | 416972 | 1768930 |
| SAMN07153272 | 20154154 | MN | 118   | 167 | 13 | + | <i>mrp</i>      | <i>fbaA, prtF2, sfb1, sof</i> |  |  |  |  |  |  |  |  |  |  | C,G,Z         | 1  |   |                                       | 35  | 243515 | 401377 | 1767751 |
| SAMN07153347 | 20154600 | TN | 118   | 167 | 13 | + | <i>enn, mrp</i> | <i>fbaA, prtF2, sfb1, sof</i> |  |  |  |  |  |  |  |  |  |  | C,G,Z         | 1  |   |                                       | 13  | 243711 | 573932 | 1774993 |
| SAMN07153375 | 20154630 | GA | 118   | 167 | 13 | + | <i>enn, mrp</i> | <i>fbaA, prtF2, sfb1, sof</i> |  |  |  |  |  |  |  |  |  |  | C,G,Z         | 1  |   |                                       | 12  | 275530 | 773432 | 1774270 |
| SAMN07153435 | 20154967 | NY | 118   | 167 | 13 | + | <i>enn, mrp</i> | <i>fbaA, prtF2, sfb1, sof</i> |  |  |  |  |  |  |  |  |  |  | C,G,Z         | 1  |   |                                       | 23  | 275397 | 773993 | 1770584 |
| SAMN07153459 | 20155037 | MN | 118   | 167 | 13 | + | <i>enn, mrp</i> | <i>fbaA, prtF2, sfb1, sof</i> |  |  |  |  |  |  |  |  |  |  | C,G,Z         | 1  |   |                                       | 13  | 243691 | 774495 | 1776060 |
| SAMN07153504 | 20155205 | GA | 118   | 167 | 13 | + | <i>enn, mrp</i> | <i>fbaA, prtF2, sfb1, sof</i> |  |  |  |  |  |  |  |  |  |  | C,G,Z         | 1  |   |                                       | 19  | 233263 | 285192 | 1770783 |
| SAMN07153524 | 20155365 | CT | 118   | 167 | 13 | + | <i>enn, mrp</i> | <i>fbaA, prtF2, sfb1, sof</i> |  |  |  |  |  |  |  |  |  |  | C,G,Z         | 1  |   |                                       | 24  | 272888 | 774003 | 1768681 |
| SAMN07153574 | 20155582 | TN | 118   | 167 | 13 | + | <i>enn, mrp</i> | <i>fbaA, prtF2, sfb1, sof</i> |  |  |  |  |  |  |  |  |  |  | C,G,Z         | 1  |   |                                       | 12  | 243590 | 773213 | 1774198 |
| SAMN07153654 | 20156016 | GA | 118   | 167 | 13 | + | <i>enn, mrp</i> | <i>fbaA, prtF2, sfb1, sof</i> |  |  |  |  |  |  |  |  |  |  | C,G,Z         | 1  |   |                                       | 22  | 243591 | 774382 | 1776454 |
| SAMN07153823 | 20156636 | NY | 118   | 167 | 13 | + | <i>enn, mrp</i> | <i>fbaA, prtF2, sfb1, sof</i> |  |  |  |  |  |  |  |  |  |  | C,G,H,Z       | 1  |   |                                       | 16  | 243676 | 813638 | 1809448 |
| SAMN07153929 | 20160173 | GA | 118   | 167 | 13 | + | <i>enn, mrp</i> | <i>fbaA, prtF2, sfb1, sof</i> |  |  |  |  |  |  |  |  |  |  | C,G,Z         | 1  |   |                                       | 13  | 243703 | 542572 | 1770020 |
| SAMN07153984 | 20160455 | GA | 118   | 167 | 13 | + | <i>enn, mrp</i> | <i>fbaA, prtF2, sfb1, sof</i> |  |  |  |  |  |  |  |  |  |  | C,G,Z         | 1  |   |                                       | 15  | 233297 | 541598 | 1770006 |
| SAMN07153992 | 20160496 | NM | 118   | 167 | 13 | + | <i>enn, mrp</i> | <i>fbaA, prtF2, sfb1, sof</i> |  |  |  |  |  |  |  |  |  |  | C,G,Z         | 1  |   |                                       | 15  | 315913 | 692031 | 1771178 |
| SAMN07154203 | 20161739 | CT | 118   | 167 | 13 | + | <i>enn, mrp</i> | <i>fbaA, prtF2, sfb1, sof</i> |  |  |  |  |  |  |  |  |  |  | C,G,Z         | 1  |   |                                       | 31  | 116259 | 212929 | 1771396 |
| SAMN07153015 | 20152519 | MN | 118   | 848 | 13 | + | <i>enn, mrp</i> | <i>fbaA, prtF2, sfb1, sof</i> |  |  |  |  |  |  |  |  |  |  | C,G,Z         | 1  |   |                                       | 62  | 56219  | 114825 | 1780982 |
| SAMN07153184 | 20153613 | CO | 118   | 854 | 13 | + | <i>enn, mrp</i> | <i>fbaA, prtF2, sfb1, sof</i> |  |  |  |  |  |  |  |  |  |  | C,G,Z         | 1  |   |                                       | 18  | 233348 | 539058 | 1767897 |
| SAMN07153663 | 20156102 | NM | 118   | 863 | 13 | + | <i>enn, mrp</i> | <i>fbaA, prtF2, sfb1, sof</i> |  |  |  |  |  |  |  |  |  |  | C,G,Z         | 1  |   |                                       | 16  | 465671 | 538203 | 1816888 |
| SAMN07154267 | 20162134 | CA | 151.1 | 433 | 49 | + | <i>enn, mrp</i> | <i>fbaA, prtF2, sof</i>       |  |  |  |  |  |  |  |  |  |  | G,H,I         | 1  |   |                                       | 39  | 112916 | 474976 | 1752382 |
| SAMN07154290 | 20162158 | CA | 151.1 | 433 | 49 | + | <i>enn, mrp</i> | <i>fbaA, prtF2, sof</i>       |  |  |  |  |  |  |  |  |  |  | G,H,I         | 1  |   |                                       | 37  | 112796 | 296422 | 1748608 |
| SAMN07154421 | 20165275 | CA | 151.1 | 433 | 49 | + | <i>enn, mrp</i> | <i>fbaA, prtF2, sof</i>       |  |  |  |  |  |  |  |  |  |  | G,H,I         | 1  |   |                                       | 102 | 99382  | 303207 | 1755263 |
| SAMN07153556 | 20155408 | NY | 165   | 768 | -  | + | <i>enn, mrp</i> | <i>fbaA, sfb1, sof</i>        |  |  |  |  |  |  |  |  |  |  | H,I,L,M,Z     | 1  |   | <i>tetM</i>                           | 45  | 81224  | 208953 | 1849704 |
| SAMN07153671 | 20156110 | NM | 216.1 | 865 | -  | + | <i>enn, mrp</i> | <i>fbaA</i>                   |  |  |  |  |  |  |  |  |  |  | A,S,Z         | 8  |   | <i>parC-S6A</i>                       | 48  | 85513  | 242949 | 1784813 |
| SAMN07154243 | 20162109 | CA | 227.1 | 28  | 1  | + | -               | <i>fbaA</i>                   |  |  |  |  |  |  |  |  |  |  | A,G,I,Z       | 1  |   |                                       | 33  | 221630 | 478784 | 1807277 |



|              |          |    |                |       |    |   |                 |                               |   |   |   |   |   |   |           |    |                                        |     |        |        |         |
|--------------|----------|----|----------------|-------|----|---|-----------------|-------------------------------|---|---|---|---|---|---|-----------|----|----------------------------------------|-----|--------|--------|---------|
| SAMN07153904 | 20160031 | CO | 232            | 902   | 11 | + | <i>enn, mrp</i> | <i>fbaA, prtF2, sfb1, sof</i> | + | - | - | - | - | + | G,H,I,J,Z | 1  | -                                      | 24  | 181040 | 286749 | 1773188 |
| SAMN07153843 | 20156719 | CT | 234.8          | 914   | -  | + | -               | <i>fbaA, sfb1</i>             | + | - | - | - | - | - | G         | 29 | -                                      | 47  | 88181  | 169087 | 1726832 |
| SAMN07153804 | 20156593 | OR | 238.1          | 868   | -  | + | -               | <i>fbaA, sfb1</i>             | + | - | + | - | - | - | A,G,I,Z   | 1  | -                                      | 28  | 179797 | 257940 | 1799495 |
| SAMN07153776 | 20156432 | CA | 238.2          | 867   | -  | + | -               | <i>fbaA, sfb1</i>             | + | - | + | - | - | - | G,J,Z     | 1  | -                                      | 59  | 47084  | 192956 | 1702309 |
| SAMN07153935 | 20160179 | GA | emm-neg: 36 12 |       | +  | - | -               | <i>prtF2, sfb1</i>            | + | + | - | - | + | + | C,G,H,I,Z | 4  | -                                      | 48  | 123300 | 201699 | 1803651 |
| SAMN07153302 | 20154376 | NY | stG245.0       | se128 | -  | + | -               | <i>sfb1</i>                   | - | - | - | - | - | + | -         | 5  | <i>mef, folA-13V,K5E,E8D,D14E,I19V</i> | 163 | 28939  | 73406  | 2147443 |
| SAMN07153560 | 20155412 | NY | stG245.0       | se128 | -  | + | -               | -                             | - | - | - | - | - | + | -         | 5  | <i>mef, folA-13V,K5E,E8D,D14E,I19V</i> | 102 | 47696  | 127725 | 2137649 |
| SAMN07153678 | 20156157 | NY | stG245.0       | se128 | -  | + | -               | -                             | - | - | - | - | - | + | -         | 5  | <i>mef, folA-13V,K5E,E8D,D14E,I19V</i> | 97  | 73666  | 227820 | 2180091 |
| SAMN07154052 | 20160976 | NY | stG485.0       | se128 | -  | + | -               | -                             | - | - | - | - | - | + | -         | 5  | <i>folA-13V,K5E,E8D,D14E,I19V</i>      | 101 | 53735  | 100234 | 2225851 |
| SAMN07154253 | 20162120 | CA | stG485.0       | se128 | -  | + | -               | -                             | - | - | - | - | - | + | -         | 5  | <i>folA-13V,K5E,E8D,D14E,I19V</i>      | 130 | 64239  | 139935 | 2016757 |
| SAMN07154273 | 20162140 | CA | stG485.0       | se128 | -  | + | -               | -                             | - | - | - | - | - | + | -         | 5  | <i>folA-13V,K5E,E8D,D14E,I19V</i>      | 111 | 63720  | 139865 | 2007008 |
| SAMN07153383 | 20154682 | NM | stG652.0       | se128 | -  | + | -               | <i>sfb1</i>                   | - | - | - | - | - | + | -         | 5  | <i>folA-13V,K5E,E8D,D14E,I19V</i>      | 80  | 54335  | 152842 | 2009673 |
| SAMN07153783 | 20156439 | CA | stG652.0       | se128 | -  | + | -               | <i>sfb1</i>                   | - | - | - | - | - | + | -         | 5  | <i>folA-13V,K5E,E8D,D14E,I19V</i>      | 206 | 62834  | 139977 | 2005443 |
| SAMN07153796 | 20156452 | CA | stG652.0       | se128 | -  | + | -               | -                             | - | - | - | - | - | + | -         | 5  | <i>folA-13V,K5E,E8D,D14E,I19V</i>      | 119 | 68899  | 157358 | 2086019 |
| SAMN07154238 | 20162102 | CA | stG652.0       | se128 | -  | + | -               | -                             | - | - | - | - | - | + | -         | 5  | <i>folA-13V,K5E,E8D,D14E,I19V</i>      | 113 | 64533  | 220134 | 2084996 |
| SAMN07154260 | 20162127 | CA | stG652.0       | se128 | -  | + | -               | -                             | - | - | - | - | - | + | -         | 5  | <i>folA-13V,K5E,E8D,D14E,I19V</i>      | 108 | 68871  | 152694 | 2003295 |
| SAMN07154389 | 20163069 | CT | stG652.0       | se128 | -  | + | -               | -                             | - | - | - | - | - | + | -         | 5  | <i>folA-13V,K5E,E8D,D14E,I19V</i>      | 201 | 37456  | 125007 | 2036244 |
